# Supplementary material for: Pregnancy Induces Transcriptional Activation of the Peripheral Innate Immune System and Increases Oxidative DNA Damage among Healthy Third Trimester Pregnant Women
Source: PLoS One. 2012 Nov 2;7(11):e46736. doi: 10.1371/journal.pone.0046736 (PMC3487782; doi:10.1371/journal.pone.0046736)
Supplement: Table S1 — Genes differentially expressed in third trimester pregnant women and non-pregnant women at week 0 (baseline) and week 12 (study end) of the controlled feeding study. Benjamini-Hochberg adjusted P values<0.05; Data were analyzed with the LEMMA statistical package. (XLSX) [file pone.0046736.s001.xlsx]

## Sheet: Table S1
Gene symbol	Gene name	Gene ontology	Week 0 fold change	Week 12 fold change
Expression altered both at week 0 and week 12
AATK	apoptosis-associated tyrosine kinase	GO:0000166(nucleotide binding)|GO:0004674(protein serine/threonine kinase activity)|GO:0004713(protein tyrosine kinase activity)|GO:0005515(protein binding)|GO:0005524(ATP binding)|GO:0005737(cytoplasm)|GO:0005739(mitochondrion)|GO:0006915(apoptosis)|GO:0016020(membrane)|GO:0016021(integral to membrane)|GO:0016740(transferase activity)|GO:0046777(protein amino acid autophosphorylation)|GO:0048471…	2.02015	2.13346
ABCA13	ATP-binding cassette, sub-family A (ABC1), member 13	GO:0000166(nucleotide binding)|GO:0005524(ATP binding)|GO:0006810(transport)|GO:0016020(membrane)|GO:0016021(integral to membrane)|GO:0016887(ATPase activity)	18.4034	13.4432
ABCC13	ATP-binding cassette, sub-family C (CFTR/MRP), member 13	GO:0005524(ATP binding)|GO:0005634(nucleus)|GO:0016020(membrane)|GO:0016021(integral to membrane)|GO:0042626(ATPase activity, coupled to transmembrane movement of substances)|GO:0055085(transmembrane transport)	2.99202	2.93001
ACER1	alkaline ceramidase 1	GO:0000139(Golgi membrane)|GO:0005783(endoplasmic reticulum)|GO:0005789(endoplasmic reticulum membrane)|GO:0006665(sphingolipid metabolic process)|GO:0016020(membrane)|GO:0016021(integral to membrane)|GO:0016787(hydrolase activity)|GO:0017040(ceramidase activity)|GO:0019216(regulation of lipid metabolic process)|GO:0046514(ceramide catabolic process)	2.10804	2.70605
ACOT12	acyl-CoA thioesterase 12	GO:0003986(acetyl-CoA hydrolase activity)|GO:0004091(carboxylesterase activity)|GO:0005524(ATP binding)|GO:0005737(cytoplasm)|GO:0005829(cytosol)|GO:0006084(acetyl-CoA metabolic process)|GO:0006629(lipid metabolic process)|GO:0006637(acyl-CoA metabolic process)|GO:0016787(hydrolase activity)	2.2284	2.58772
ACSL1	acyl-CoA synthetase long-chain family member 1	GO:0000166(nucleotide binding)|GO:0000287(magnesium ion binding)|GO:0004467(long-chain-fatty-acid-CoA ligase activity)|GO:0005524(ATP binding)|GO:0005625(soluble fraction)|GO:0005739(mitochondrion)|GO:0005741(mitochondrial outer membrane)|GO:0005777(peroxisome)|GO:0005778(peroxisomal membrane)|GO:0005783(endoplasmic reticulum)|GO:0005792(microsome)|GO:0005829(cytosol)|GO:0005886(plasma membrane)|…	4.54976	4.11259
ADAM23	ADAM metallopeptidase domain 23	GO:0004222(metalloendopeptidase activity)|GO:0005178(integrin binding)|GO:0005515(protein binding)|GO:0005576(extracellular region)|GO:0005886(plasma membrane)|GO:0005887(integral to plasma membrane)|GO:0006508(proteolysis)|GO:0007155(cell adhesion)|GO:0007417(central nervous system development)|GO:0008270(zinc ion binding)	0.274713	0.254726
ADAM28	ADAM metallopeptidase domain 28	GO:0004222(metalloendopeptidase activity)|GO:0005576(extracellular region)|GO:0005886(plasma membrane)|GO:0006508(proteolysis)|GO:0007283(spermatogenesis)|GO:0008233(peptidase activity)|GO:0008270(zinc ion binding)|GO:0016021(integral to membrane)|GO:0046872(metal ion binding)	0.431732	0.452403
ADAMTS7	ADAM metallopeptidase with thrombospondin type 1 motif, 7	GO:0004222(metalloendopeptidase activity)|GO:0005576(extracellular region)|GO:0005578(proteinaceous extracellular matrix)|GO:0006508(proteolysis)|GO:0008233(peptidase activity)|GO:0008270(zinc ion binding)|GO:0046872(metal ion binding)	2.10696	2.35944
ADM	adrenomedullin	GO:0001666(response to hypoxia)|GO:0005179(hormone activity)|GO:0005576(extracellular region)|GO:0005615(extracellular space)|GO:0005625(soluble fraction)|GO:0005737(cytoplasm)|GO:0006171(cAMP biosynthetic process)|GO:0006701(progesterone biosynthetic process)|GO:0007165(signal transduction)|GO:0007186(G-protein coupled receptor protein signaling pathway)|GO:0007204(elevation of cytosolic calcium…	4.88823	4.29232
ADORA1	adenosine A1 receptor	GO:0000186(activation of MAPKK activity)|GO:0001609(adenosine receptor activity, G-protein coupled)|GO:0001659(temperature homeostasis)|GO:0001883(purine nucleoside binding)|GO:0002087(regulation of respiratory gaseous exchange by neurological system process)|GO:0002686(negative regulation of leukocyte migration)|GO:0002793(positive regulation of peptide secretion)|GO:0004872(receptor activity)|G…	2.27113	2.21172
ADORA3	adenosine A3 receptor	GO:0001609(adenosine receptor activity, G-protein coupled)|GO:0004872(receptor activity)|GO:0004930(G-protein coupled receptor activity)|GO:0005886(plasma membrane)|GO:0005887(integral to plasma membrane)|GO:0006954(inflammatory response)|GO:0007165(signal transduction)|GO:0007186(G-protein coupled receptor protein signaling pathway)|GO:0007190(activation of adenylate cyclase activity)|GO:0008016…	2.33253	2.09751
ADRA1A	adrenergic, alpha-1A-, receptor	GO:0004872(receptor activity)|GO:0004930(G-protein coupled receptor activity)|GO:0004935(adrenoceptor activity)|GO:0004937(alpha1-adrenergic receptor activity)|GO:0005886(plasma membrane)|GO:0005887(integral to plasma membrane)|GO:0006915(apoptosis)|GO:0006939(smooth muscle contraction)|GO:0007165(signal transduction)|GO:0007186(G-protein coupled receptor protein signaling pathway)|GO:0007243(pro…	2.91024	2.64239
AGAP3	ArfGAP with GTPase domain, ankyrin repeat and PH domain 3	GO:0000166(nucleotide binding)|GO:0003924(GTPase activity)|GO:0005525(GTP binding)|GO:0005622(intracellular)|GO:0005737(cytoplasm)|GO:0007165(signal transduction)|GO:0007264(small GTPase mediated signal transduction)|GO:0008060(ARF GTPase activator activity)|GO:0008270(zinc ion binding)|GO:0016020(membrane)|GO:0032312(regulation of ARF GTPase activity)|GO:0046872(metal ion binding)	2.07099	2.23141
AGPAT2	1-acylglycerol-3-phosphate O-acyltransferase 2 (lysophosphatidic acid acyltransferase, beta)	GO:0001819(positive regulation of cytokine production)|GO:0001961(positive regulation of cytokine-mediated signaling pathway)|GO:0003841(1-acylglycerol-3-phosphate O-acyltransferase activity)|GO:0005783(endoplasmic reticulum)|GO:0005829(cytosol)|GO:0006654(phosphatidic acid biosynthetic process)|GO:0008152(metabolic process)|GO:0008415(acyltransferase activity)|GO:0008654(phospholipid biosyntheti…	3.43119	3.09294
AGRN	agrin	GO:0005200(structural constituent of cytoskeleton)|GO:0005576(extracellular region)|GO:0005605(basal lamina)|GO:0007009(plasma membrane organization)|GO:0007165(signal transduction)|GO:0007213(muscarinic acetylcholine receptor signaling pathway)|GO:0007416(synapse assembly)|GO:0007528(neuromuscular junction development)|GO:0008582(regulation of synaptic growth at neuromuscular junction)|GO:000998…	2.36723	2.47128
AHSG	alpha-2-HS-glycoprotein	GO:0001501(skeletal system development)|GO:0004869(cysteine-type endopeptidase inhibitor activity)|GO:0005515(protein binding)|GO:0005576(extracellular region)|GO:0005615(extracellular space)|GO:0006907(pinocytosis)|GO:0006953(acute-phase response)|GO:0019210(kinase inhibitor activity)|GO:0030502(negative regulation of bone mineralization)|GO:0046627(negative regulation of insulin receptor signal…	2.28686	2.6154
AHSP	alpha hemoglobin stabilizing protein	GO:0005737(cytoplasm)|GO:0005833(hemoglobin complex)|GO:0006457(protein folding)|GO:0020027(hemoglobin metabolic process)|GO:0030097(hemopoiesis)|GO:0030492(hemoglobin binding)|GO:0050821(protein stabilization)|GO:0051082(unfolded protein binding)	4.98254	4.70008
AIM2	absent in melanoma 2	GO:0005515(protein binding)|GO:0005634(nucleus)|GO:0006955(immune response)	2.22438	2.06352
AK1	adenylate kinase 1	GO:0000166(nucleotide binding)|GO:0004017(adenylate kinase activity)|GO:0005515(protein binding)|GO:0005524(ATP binding)|GO:0005634(nucleus)|GO:0005737(cytoplasm)|GO:0005829(cytosol)|GO:0006139(nucleobase, nucleoside, nucleotide and nucleic acid metabolic process)|GO:0016740(transferase activity)|GO:0019206(nucleoside kinase activity)|GO:0046034(ATP metabolic process)	3.14465	3.23627
AKT3	v-akt murine thymoma viral oncogene homolog 3 (protein kinase B, gamma)	GO:0000166(nucleotide binding)|GO:0004674(protein serine/threonine kinase activity)|GO:0005515(protein binding)|GO:0005524(ATP binding)|GO:0005737(cytoplasm)|GO:0006468(protein amino acid phosphorylation)|GO:0007165(signal transduction)|GO:0016020(membrane)|GO:0016740(transferase activity)|GO:0019898(extrinsic to membrane)	0.468738	0.489342
ALAS2	aminolevulinate, delta-, synthase 2	GO:0001666(response to hypoxia)|GO:0003870(5-aminolevulinate synthase activity)|GO:0005515(protein binding)|GO:0005739(mitochondrion)|GO:0005743(mitochondrial inner membrane)|GO:0005759(mitochondrial matrix)|GO:0006778(porphyrin metabolic process)|GO:0006783(heme biosynthetic process)|GO:0006879(cellular iron ion homeostasis)|GO:0008415(acyltransferase activity)|GO:0009058(biosynthetic process)|G…	3.40558	3.44955
ALPK1	alpha-kinase 1	GO:0004674(protein serine/threonine kinase activity)|GO:0005524(ATP binding)|GO:0006468(protein amino acid phosphorylation)|GO:0016301(kinase activity)|GO:0016740(transferase activity)	2.58747	2.62804
ALPL	alkaline phosphatase, liver/bone/kidney	GO:0000287(magnesium ion binding)|GO:0001501(skeletal system development)|GO:0004035(alkaline phosphatase activity)|GO:0005886(plasma membrane)|GO:0008152(metabolic process)|GO:0008270(zinc ion binding)|GO:0016021(integral to membrane)|GO:0016787(hydrolase activity)|GO:0031214(biomineral formation)|GO:0031225(anchored to membrane)|GO:0033280(response to vitamin D)|GO:0046677(response to antibioti…	4.48195	4.45333
AMN	amnionless homolog (mouse)	GO:0007275(multicellular organismal development)|GO:0007588(excretion)|GO:0008104(protein localization)|GO:0016020(membrane)|GO:0016021(integral to membrane)|GO:0045177(apical part of cell)	2.63612	3.10124
AMOTL1	angiomotin like 1	GO:0005737(cytoplasm)|GO:0005923(tight junction)|GO:0030054(cell junction)|GO:0042802(identical protein binding)	2.18602	2.2118
ANK1	ankyrin 1, erythrocytic	GO:0005200(structural constituent of cytoskeleton)|GO:0005737(cytoplasm)|GO:0005886(plasma membrane)|GO:0006887(exocytosis)|GO:0007010(cytoskeleton organization)|GO:0007165(signal transduction)|GO:0008093(cytoskeletal adaptor activity)|GO:0014731(spectrin-associated cytoskeleton)|GO:0016323(basolateral plasma membrane)|GO:0016529(sarcoplasmic reticulum)|GO:0019899(enzyme binding)|GO:0030507(spect…	2.30755	2.50732
ANKRD22	ankyrin repeat domain 22		6.15646	5.67961
ANKRD53	ankyrin repeat domain 53		2.02228	2.07632
ANKRD9	ankyrin repeat domain 9		2.23268	2.1828
ANLN	anillin, actin binding protein	GO:0000910(cytokinesis)|GO:0000921(septin ring assembly)|GO:0003779(actin binding)|GO:0005634(nucleus)|GO:0005737(cytoplasm)|GO:0005826(actomyosin contractile ring)|GO:0005938(cell cortex)|GO:0007049(cell cycle)|GO:0007067(mitosis)|GO:0007096(regulation of exit from mitosis)	3.16983	3.04259
ANPEP	alanyl (membrane) aminopeptidase	GO:0001525(angiogenesis)|GO:0004177(aminopeptidase activity)|GO:0004872(receptor activity)|GO:0005625(soluble fraction)|GO:0005737(cytoplasm)|GO:0005793(ER-Golgi intermediate compartment)|GO:0005829(cytosol)|GO:0005886(plasma membrane)|GO:0005887(integral to plasma membrane)|GO:0006508(proteolysis)|GO:0006725(cellular aromatic compound metabolic process)|GO:0007275(multicellular organismal develo…	2.67419	2.40322
ANXA3	annexin A3	GO:0005509(calcium ion binding)|GO:0005544(calcium-dependent phospholipid binding)|GO:0005737(cytoplasm)|GO:0007165(signal transduction)|GO:0019834(phospholipase A2 inhibitor activity)	10.9866	8.31273
APOBEC3A	apolipoprotein B mRNA editing enzyme, catalytic polypeptide-like 3A	GO:0005575(cellular_component)|GO:0008150(biological_process)|GO:0008270(zinc ion binding)|GO:0016787(hydrolase activity)|GO:0016814(hydrolase activity, acting on carbon-nitrogen (but not peptide) bonds, in cyclic amidines)|GO:0046872(metal ion binding)	3.79459	2.81565
APOBEC3B	apolipoprotein B mRNA editing enzyme, catalytic polypeptide-like 3B	GO:0003723(RNA binding)|GO:0005575(cellular_component)|GO:0008150(biological_process)|GO:0008270(zinc ion binding)|GO:0016787(hydrolase activity)|GO:0016814(hydrolase activity, acting on carbon-nitrogen (but not peptide) bonds, in cyclic amidines)|GO:0046872(metal ion binding)	3.25758	2.81217
AQP9	aquaporin 9	GO:0005215(transporter activity)|GO:0005275(amine transmembrane transporter activity)|GO:0005345(purine transmembrane transporter activity)|GO:0005350(pyrimidine transmembrane transporter activity)|GO:0005792(microsome)|GO:0005887(integral to plasma membrane)|GO:0006833(water transport)|GO:0006863(purine transport)|GO:0006955(immune response)|GO:0006970(response to osmotic stress)|GO:0007588(excr…	3.33933	3.1642
ARG1	arginase, liver	GO:0000050(urea cycle)|GO:0004053(arginase activity)|GO:0005737(cytoplasm)|GO:0006527(arginine catabolic process)|GO:0016787(hydrolase activity)|GO:0030145(manganese ion binding)|GO:0046872(metal ion binding)	11.7023	11.318
ARHGEF16	Rho guanine exchange factor (GEF) 16	GO:0005085(guanyl-nucleotide exchange factor activity)|GO:0005089(Rho guanyl-nucleotide exchange factor activity)|GO:0005622(intracellular)|GO:0005829(cytosol)|GO:0006915(apoptosis)|GO:0008624(induction of apoptosis by extracellular signals)|GO:0035023(regulation of Rho protein signal transduction)	2.10249	2.18003
ARL11	ADP-ribosylation factor-like 11	GO:0000166(nucleotide binding)|GO:0005515(protein binding)|GO:0005525(GTP binding)|GO:0005622(intracellular)|GO:0007264(small GTPase mediated signal transduction)	2.12399	2.4901
ART4	ADP-ribosyltransferase 4 (Dombrock blood group)	GO:0003956(NAD(P)+-protein-arginine ADP-ribosyltransferase activity)|GO:0005886(plasma membrane)|GO:0006471(protein amino acid ADP-ribosylation)|GO:0006525(arginine metabolic process)|GO:0016757(transferase activity, transferring glycosyl groups)|GO:0031225(anchored to membrane)	3.62045	3.17572
ARTN	artemin	GO:0005576(extracellular region)|GO:0007165(signal transduction)|GO:0007405(neuroblast proliferation)|GO:0008083(growth factor activity)	2.96976	2.68299
ASCL5	achaete-scute complex homolog 5 (Drosophila)	GO:0003677(DNA binding)|GO:0005634(nucleus)|GO:0030528(transcription regulator activity)|GO:0045449(regulation of transcription)	2.2356	2.44386
ASPH	aspartate beta-hydroxylase	GO:0004597(peptide-aspartate beta-dioxygenase activity)|GO:0005488(binding)|GO:0005506(iron ion binding)|GO:0005509(calcium ion binding)|GO:0005783(endoplasmic reticulum)|GO:0005789(endoplasmic reticulum membrane)|GO:0006936(muscle contraction)|GO:0007389(pattern specification process)|GO:0008285(negative regulation of cell proliferation)|GO:0008307(structural constituent of muscle)|GO:0009055(el…	2.10151	2.08582
ASPHD1	aspartate beta-hydroxylase domain containing 1	GO:0004597(peptide-aspartate beta-dioxygenase activity)|GO:0016020(membrane)|GO:0016021(integral to membrane)|GO:0016491(oxidoreductase activity)|GO:0016702(oxidoreductase activity, acting on single donors with incorporation of molecular oxygen, incorporation of two atoms of oxygen)|GO:0018193(peptidyl-amino acid modification)|GO:0030176(integral to endoplasmic reticulum membrane)|GO:0055114(oxid…	2.45602	2.63349
ASPM	asp (abnormal spindle) homolog, microcephaly associated (Drosophila)	GO:0000922(spindle pole)|GO:0005516(calmodulin binding)|GO:0005634(nucleus)|GO:0005737(cytoplasm)|GO:0007049(cell cycle)|GO:0007067(mitosis)|GO:0021873(forebrain neuroblast division)|GO:0045665(negative regulation of neuron differentiation)|GO:0045769(negative regulation of asymmetric cell division)|GO:0051301(cell division)|GO:0051661(maintenance of centrosome location)	2.02915	2.06814
ATP2C2	ATPase, Ca++ transporting, type 2C, member 2	GO:0000166(nucleotide binding)|GO:0000287(magnesium ion binding)|GO:0005388(calcium-transporting ATPase activity)|GO:0005509(calcium ion binding)|GO:0005524(ATP binding)|GO:0006754(ATP biosynthetic process)|GO:0006812(cation transport)|GO:0006816(calcium ion transport)|GO:0008152(metabolic process)|GO:0016020(membrane)|GO:0016021(integral to membrane)|GO:0016787(hydrolase activity)|GO:0016820(hyd…	4.12839	3.12859
AUTS2	autism susceptibility candidate 2	GO:0003674(molecular_function)|GO:0005575(cellular_component)|GO:0008150(biological_process)	0.427975	0.422815
AZU1	azurocidin 1	GO:0001774(microglial cell activation)|GO:0003824(catalytic activity)|GO:0004252(serine-type endopeptidase activity)|GO:0005576(extracellular region)|GO:0006508(proteolysis)|GO:0006916(anti-apoptosis)|GO:0006935(chemotaxis)|GO:0006954(inflammatory response)|GO:0007205(activation of protein kinase C activity by G-protein coupled receptor protein signaling pathway)|GO:0008201(heparin binding)|GO:00…	3.33013	2.94438
B3GALT2	UDP-Gal:betaGlcNAc beta 1,3-galactosyltransferase, polypeptide 2	GO:0005794(Golgi apparatus)|GO:0006486(protein amino acid glycosylation)|GO:0008378(galactosyltransferase activity)|GO:0008499(UDP-galactose:beta-N-acetylglucosamine beta-1,3-galactosyltransferase activity)|GO:0009312(oligosaccharide biosynthetic process)|GO:0016020(membrane)|GO:0016021(integral to membrane)|GO:0016757(transferase activity, transferring glycosyl groups)|GO:0030145(manganese ion b…	0.492428	0.477852
B3GNT5	UDP-GlcNAc:betaGal beta-1,3-N-acetylglucosaminyltransferase 5	GO:0005622(intracellular)|GO:0005794(Golgi apparatus)|GO:0006486(protein amino acid glycosylation)|GO:0007275(multicellular organismal development)|GO:0007417(central nervous system development)|GO:0008378(galactosyltransferase activity)|GO:0008457(beta-galactosyl-N-acetylglucosaminylgalactosylglucosyl-ceramide beta-1,3-acetylglucosaminyltransferase activity)|GO:0008917(lipopolysaccharide N-acety…	3.07131	3.05545
B4GALT5	UDP-Gal:betaGlcNAc beta 1,4- galactosyltransferase, polypeptide 5	GO:0005794(Golgi apparatus)|GO:0005975(carbohydrate metabolic process)|GO:0008378(galactosyltransferase activity)|GO:0016020(membrane)|GO:0016021(integral to membrane)|GO:0016757(transferase activity, transferring glycosyl groups)|GO:0030145(manganese ion binding)|GO:0046872(metal ion binding)	2.70672	2.58972
BAALC	brain and acute leukemia, cytoplasmic	GO:0005737(cytoplasm)|GO:0016020(membrane)	0.455635	0.36006
BASP1	brain abundant, membrane attached signal protein 1	GO:0005856(cytoskeleton)|GO:0005886(plasma membrane)|GO:0030426(growth cone)|GO:0031225(anchored to membrane)|GO:0042995(cell projection)	3.17049	3.24383
BATF2	basic leucine zipper transcription factor, ATF-like 2	GO:0003700(transcription factor activity)|GO:0005634(nucleus)|GO:0006355(regulation of transcription, DNA-dependent)|GO:0043565(sequence-specific DNA binding)|GO:0046983(protein dimerization activity)	2.7649	2.83961
BBS5	Bardet-Biedl syndrome 5	GO:0001947(heart looping)|GO:0005622(intracellular)|GO:0005737(cytoplasm)|GO:0005886(plasma membrane)|GO:0005929(cilium)|GO:0005932(microtubule basal body)|GO:0007601(visual perception)|GO:0009296(flagellum assembly)|GO:0032266(phosphatidylinositol 3-phosphate binding)|GO:0032402(melanosome transport)|GO:0034464(BBSome)|GO:0042384(cilium assembly)|GO:0050896(response to stimulus)|GO:0060170(ciliu…	0.428233	0.386811
BCL2	B-cell CLL/lymphoma 2	GO:0000082(G1/S transition of mitotic cell cycle)|GO:0000159(protein phosphatase type 2A complex)|GO:0000902(cell morphogenesis)|GO:0001541(ovarian follicle development)|GO:0001657(ureteric bud development)|GO:0001658(branching involved in ureteric bud morphogenesis)|GO:0001662(behavioral fear response)|GO:0001666(response to hypoxia)|GO:0001782(B cell homeostasis)|GO:0001836(release of cytochrom…	2.04075	2.15086
BCL2A1	BCL2-related protein A1	GO:0005515(protein binding)|GO:0005737(cytoplasm)|GO:0006916(anti-apoptosis)|GO:0042981(regulation of apoptosis)	2.74798	2.30372
BCL2L1	BCL2-like 1	GO:0001541(ovarian follicle development)|GO:0001666(response to hypoxia)|GO:0001701(in utero embryonic development)|GO:0001836(release of cytochrome c from mitochondria)|GO:0005622(intracellular)|GO:0005634(nucleus)|GO:0005739(mitochondrion)|GO:0005741(mitochondrial outer membrane)|GO:0005829(cytosol)|GO:0006979(response to oxidative stress)|GO:0007281(germ cell development)|GO:0007283(spermatoge…	2.07627	2.33166
BCL3	B-cell CLL/lymphoma 3	GO:0000060(protein import into nucleus, translocation)|GO:0002268(follicular dendritic cell differentiation)|GO:0002315(marginal zone B cell differentiation)|GO:0002455(humoral immune response mediated by circulating immunoglobulin)|GO:0002467(germinal center formation)|GO:0003700(transcription factor activity)|GO:0005634(nucleus)|GO:0005737(cytoplasm)|GO:0006974(response to DNA damage stimulus)|…	2.39029	2.12722
BCL6	B-cell CLL/lymphoma 6	GO:0000060(protein import into nucleus, translocation)|GO:0000122(negative regulation of transcription from RNA polymerase II promoter)|GO:0000902(cell morphogenesis)|GO:0001953(negative regulation of cell-matrix adhesion)|GO:0002634(regulation of germinal center formation)|GO:0002829(negative regulation of T-helper 2 type immune response)|GO:0002903(negative regulation of B cell apoptosis)|GO:00…	3.09747	2.57353
BEND7	BEN domain containing 7	GO:0005515(protein binding)	2.43331	2.23846
BEST1	bestrophin 1	GO:0005216(ion channel activity)|GO:0005254(chloride channel activity)|GO:0005509(calcium ion binding)|GO:0005624(membrane fraction)|GO:0005829(cytosol)|GO:0005886(plasma membrane)|GO:0006811(ion transport)|GO:0007601(visual perception)|GO:0016021(integral to membrane)|GO:0016323(basolateral plasma membrane)|GO:0030321(transepithelial chloride transport)|GO:0031404(chloride ion binding)|GO:003470…	2.70793	2.46237
BHLHE41	basic helix-loop-helix family, member e41	GO:0003700(transcription factor activity)|GO:0005634(nucleus)|GO:0006355(regulation of transcription, DNA-dependent)|GO:0008283(cell proliferation)|GO:0009887(organ morphogenesis)|GO:0030154(cell differentiation)	0.390033	0.408674
BLK	B lymphoid tyrosine kinase	GO:0000166(nucleotide binding)|GO:0004715(non-membrane spanning protein tyrosine kinase activity)|GO:0005515(protein binding)|GO:0005524(ATP binding)|GO:0006468(protein amino acid phosphorylation)|GO:0007243(protein kinase cascade)|GO:0016740(transferase activity)	0.424525	0.456885
BLNK	B-cell linker	GO:0005068(transmembrane receptor protein tyrosine kinase adaptor protein activity)|GO:0005070(SH3/SH2 adaptor activity)|GO:0005515(protein binding)|GO:0005622(intracellular)|GO:0005737(cytoplasm)|GO:0005886(plasma membrane)|GO:0006954(inflammatory response)|GO:0006959(humoral immune response)|GO:0007242(intracellular signaling cascade)|GO:0030183(B cell differentiation)	0.484512	0.378583
BMP2	bone morphogenetic protein 2	GO:0001658(branching involved in ureteric bud morphogenesis)|GO:0005125(cytokine activity)|GO:0005576(extracellular region)|GO:0005615(extracellular space)|GO:0005737(cytoplasm)|GO:0006954(inflammatory response)|GO:0007267(cell-cell signaling)|GO:0008083(growth factor activity)|GO:0008285(negative regulation of cell proliferation)|GO:0009612(response to mechanical stimulus)|GO:0009790(embryonic d…	2.49373	2.08299
BMX	BMX non-receptor tyrosine kinase	GO:0000166(nucleotide binding)|GO:0004715(non-membrane spanning protein tyrosine kinase activity)|GO:0004871(signal transducer activity)|GO:0005515(protein binding)|GO:0005524(ATP binding)|GO:0005737(cytoplasm)|GO:0005813(centrosome)|GO:0005829(cytosol)|GO:0006468(protein amino acid phosphorylation)|GO:0007242(intracellular signaling cascade)|GO:0007498(mesoderm development)|GO:0008270(zinc ion b…	5.16364	4.55219
BPGM	2,3-bisphosphoglycerate mutase	GO:0004082(bisphosphoglycerate mutase activity)|GO:0004083(2,3-bisphospho-D-glycerate 2-phosphohydrolase activity)|GO:0004619(phosphoglycerate mutase activity)|GO:0005975(carbohydrate metabolic process)|GO:0006096(glycolysis)|GO:0007585(respiratory gaseous exchange)|GO:0008152(metabolic process)|GO:0016787(hydrolase activity)|GO:0016853(isomerase activity)|GO:0048821(erythrocyte development)	4.5596	4.10858
BPI	bactericidal/permeability-increasing protein	GO:0001530(lipopolysaccharide binding)|GO:0005576(extracellular region)|GO:0005737(cytoplasm)|GO:0005887(integral to plasma membrane)|GO:0006955(immune response)|GO:0008289(lipid binding)|GO:0008368(Gram-negative bacterial binding)|GO:0016020(membrane)|GO:0032715(negative regulation of interleukin-6 production)|GO:0032717(negative regulation of interleukin-8 production)|GO:0032720(negative regula…	14.2271	9.69373
BSG	basigin (Ok blood group)	GO:0000139(Golgi membrane)|GO:0005515(protein binding)|GO:0005529(sugar binding)|GO:0005537(mannose binding)|GO:0005739(mitochondrion)|GO:0006090(pyruvate metabolic process)|GO:0007166(cell surface receptor linked signal transduction)|GO:0007566(embryo implantation)|GO:0015129(lactate transmembrane transporter activity)|GO:0016021(integral to membrane)|GO:0042383(sarcolemma)|GO:0042470(melanosome…	2.47164	2.48679
BST1	bone marrow stromal cell antigen 1	GO:0003953(NAD+ nucleosidase activity)|GO:0005488(binding)|GO:0005886(plasma membrane)|GO:0006959(humoral immune response)|GO:0007275(multicellular organismal development)|GO:0008152(metabolic process)|GO:0016787(hydrolase activity)|GO:0019898(extrinsic to membrane)|GO:0031225(anchored to membrane)	2.90377	2.40483
BZRAP1	benzodiazapine receptor (peripheral) associated protein 1	GO:0005737(cytoplasm)|GO:0005739(mitochondrion)|GO:0008150(biological_process)|GO:0030156(benzodiazepine receptor binding)	0.467284	0.42181
C11orf16	chromosome 11 open reading frame 16		2.15265	2.02112
C11orf80	chromosome 11 open reading frame 80		0.487948	0.45848
C13orf33	chromosome 13 open reading frame 33		3.8738	2.97501
C14orf143	chromosome 14 open reading frame 143	GO:0005509(calcium ion binding)	0.371298	0.413456
C14orf68	chromosome 14 open reading frame 68	GO:0005215(transporter activity)|GO:0005488(binding)|GO:0005739(mitochondrion)|GO:0005743(mitochondrial inner membrane)|GO:0016020(membrane)|GO:0016021(integral to membrane)|GO:0055085(transmembrane transport)	2.30327	2.93978
C16orf13	chromosome 16 open reading frame 13		2.08451	2.43044
C16orf3	chromosome 16 open reading frame 3	GO:0003674(molecular_function)|GO:0005575(cellular_component)|GO:0008150(biological_process)	2.27855	2.47542
C16orf45	chromosome 16 open reading frame 45	GO:0005515(protein binding)	0.468621	0.48455
C17orf54	chromosome 17 open reading frame 54		2.08137	2.22557
C17orf65	chromosome 17 open reading frame 65		2.01358	2.06755
C17orf96	chromosome 17 open reading frame 96		2.79445	3.24002
C19orf34	chromosome 19 open reading frame 34		2.11204	2.46941
C1orf113	chromosome 1 open reading frame 113		2.04594	2.27873
C1orf128	chromosome 1 open reading frame 128		2.28155	2.13294
C1orf70	chromosome 1 open reading frame 70	GO:0016020(membrane)|GO:0016021(integral to membrane)	2.03172	2.06622
C1orf89	chromosome 1 open reading frame 89	GO:0000166(nucleotide binding)|GO:0005525(GTP binding)|GO:0005622(intracellular)|GO:0007264(small GTPase mediated signal transduction)	3.3216	2.51211
C1QB	complement component 1, q subcomponent, B chain	GO:0005576(extracellular region)|GO:0005602(complement component C1 complex)|GO:0006958(complement activation, classical pathway)|GO:0007420(brain development)|GO:0007568(aging)|GO:0010033(response to organic substance)|GO:0042803(protein homodimerization activity)|GO:0045087(innate immune response)|GO:0051384(response to glucocorticoid stimulus)	3.47695	3.3532
C1QC	complement component 1, q subcomponent, C chain	GO:0005576(extracellular region)|GO:0005634(nucleus)|GO:0005730(nucleolus)|GO:0005737(cytoplasm)|GO:0006958(complement activation, classical pathway)|GO:0030853(negative regulation of granulocyte differentiation)|GO:0045087(innate immune response)|GO:0045650(negative regulation of macrophage differentiation)	2.31531	2.2033
C2	complement component 2	GO:0004252(serine-type endopeptidase activity)|GO:0005576(extracellular region)|GO:0005615(extracellular space)|GO:0006508(proteolysis)|GO:0006957(complement activation, alternative pathway)|GO:0006958(complement activation, classical pathway)|GO:0008233(peptidase activity)	2.73616	3.58131
C20orf141	chromosome 20 open reading frame 141	GO:0016020(membrane)|GO:0016021(integral to membrane)	2.05342	2.31252
C22orf25	chromosome 22 open reading frame 25		3.08933	3.54775
C2orf3	chromosome 2 open reading frame 3	GO:0003700(transcription factor activity)|GO:0005515(protein binding)|GO:0005634(nucleus)|GO:0045449(regulation of transcription)	2.05739	2.23644
C2orf39	chromosome 2 open reading frame 39		5.57524	4.57921
C2orf58	chromosome 2 open reading frame 58		2.4014	2.18914
C3AR1	complement component 3a receptor 1	GO:0001850(complement component C3a binding)|GO:0002430(complement receptor mediated signaling pathway)|GO:0004435(phosphoinositide phospholipase C activity)|GO:0004872(receptor activity)|GO:0004876(complement component C3a receptor activity)|GO:0004930(G-protein coupled receptor activity)|GO:0004943(C3a anaphylatoxin receptor activity)|GO:0005886(plasma membrane)|GO:0005887(integral to plasma me…	2.24031	2.13372
C3orf22	chromosome 3 open reading frame 22		2.13364	2.0794
C4orf12	chromosome 4 open reading frame 12		2.05651	2.05037
C5AR1	complement component 5a receptor 1	GO:0000187(activation of MAPK activity)|GO:0004872(receptor activity)|GO:0004930(G-protein coupled receptor activity)|GO:0004944(C5a anaphylatoxin receptor activity)|GO:0005886(plasma membrane)|GO:0005887(integral to plasma membrane)|GO:0006935(chemotaxis)|GO:0006955(immune response)|GO:0006968(cellular defense response)|GO:0007165(signal transduction)|GO:0007186(G-protein coupled receptor protei…	2.54233	2.12904
C5orf32	chromosome 5 open reading frame 32		5.20073	4.50818
C5orf36	chromosome 5 open reading frame 36		2.68387	2.63606
C7orf43	chromosome 7 open reading frame 43		2.58147	2.72179
C8orf31	chromosome 8 open reading frame 31		5.70739	5.77937
C8orf4	chromosome 8 open reading frame 4	GO:0006915(apoptosis)	2.01557	2.25067
C8orf73	chromosome 8 open reading frame 73	GO:0005488(binding)|GO:0005794(Golgi apparatus)	2.06374	2.08911
C9orf109	chromosome 9 open reading frame 109		2.05191	2.24489
C9orf130	chromosome 9 open reading frame 130		3.14134	3.60913
C9orf25	chromosome 9 open reading frame 25		2.50056	3.01363
C9orf45	chromosome 9 open reading frame 45		0.413053	0.368003
C9orf72	chromosome 9 open reading frame 72		2.00989	2.08246
CA1	carbonic anhydrase I	GO:0004089(carbonate dehydratase activity)|GO:0005737(cytoplasm)|GO:0006730(one-carbon metabolic process)|GO:0008270(zinc ion binding)|GO:0016829(lyase activity)|GO:0046872(metal ion binding)	9.94876	9.52109
CA4	carbonic anhydrase IV	GO:0004089(carbonate dehydratase activity)|GO:0005624(membrane fraction)|GO:0006730(one-carbon metabolic process)|GO:0007601(visual perception)|GO:0008270(zinc ion binding)|GO:0016324(apical plasma membrane)|GO:0016529(sarcoplasmic reticulum)|GO:0016829(lyase activity)|GO:0031225(anchored to membrane)|GO:0042383(sarcolemma)|GO:0042493(response to drug)|GO:0046872(metal ion binding)|GO:0048513(org…	5.81183	5.38122
CABP5	calcium binding protein 5	GO:0005509(calcium ion binding)|GO:0005575(cellular_component)|GO:0005737(cytoplasm)|GO:0007165(signal transduction)	2.05209	2.76704
CACNA1I	calcium channel, voltage-dependent, T type, alpha 1I subunit	GO:0005244(voltage-gated ion channel activity)|GO:0005509(calcium ion binding)|GO:0005515(protein binding)|GO:0005891(voltage-gated calcium channel complex)|GO:0006811(ion transport)|GO:0006816(calcium ion transport)|GO:0007165(signal transduction)|GO:0008332(low voltage-gated calcium channel activity)|GO:0016020(membrane)|GO:0016021(integral to membrane)|GO:0055085(transmembrane transport)	2.30722	2.84278
CACNB3	calcium channel, voltage-dependent, beta 3 subunit	GO:0005244(voltage-gated ion channel activity)|GO:0005509(calcium ion binding)|GO:0005515(protein binding)|GO:0005829(cytosol)|GO:0005891(voltage-gated calcium channel complex)|GO:0006811(ion transport)|GO:0006816(calcium ion transport)|GO:0015270(dihydropyridine-sensitive calcium channel activity)|GO:0016020(membrane)|GO:0016324(apical plasma membrane)|GO:0050852(T cell receptor signaling pathwa…	2.17086	2.35512
CACNG5	calcium channel, voltage-dependent, gamma subunit 5	GO:0005244(voltage-gated ion channel activity)|GO:0005245(voltage-gated calcium channel activity)|GO:0005509(calcium ion binding)|GO:0006811(ion transport)|GO:0006816(calcium ion transport)|GO:0016020(membrane)|GO:0016021(integral to membrane)	2.23613	2.24756
CADM3	cell adhesion molecule 3	GO:0005509(calcium ion binding)|GO:0005515(protein binding)|GO:0005886(plasma membrane)|GO:0005911(cell-cell junction)|GO:0007155(cell adhesion)|GO:0007156(homophilic cell adhesion)|GO:0007157(heterophilic cell adhesion)|GO:0016021(integral to membrane)|GO:0042803(protein homodimerization activity)	2.00994	2.2915
CALML5	calmodulin-like 5	GO:0005509(calcium ion binding)|GO:0005515(protein binding)|GO:0007165(signal transduction)|GO:0008544(epidermis development)	5.22852	3.77477
CAMK2N1	calcium/calmodulin-dependent protein kinase II inhibitor 1	GO:0005886(plasma membrane)|GO:0008427(calcium-dependent protein kinase inhibitor activity)|GO:0014069(postsynaptic density)|GO:0019717(synaptosome)|GO:0019901(protein kinase binding)|GO:0030054(cell junction)|GO:0030425(dendrite)|GO:0043025(cell soma)|GO:0045202(synapse)|GO:0045211(postsynaptic membrane)	0.468813	0.461137
CAMP	cathelicidin antimicrobial peptide	GO:0005576(extracellular region)|GO:0042581(specific granule)|GO:0050829(defense response to Gram-negative bacterium)	19.5996	17.4752
CAMTA1	calmodulin binding transcription activator 1	GO:0005516(calmodulin binding)|GO:0005634(nucleus)|GO:0005737(cytoplasm)|GO:0030528(transcription regulator activity)|GO:0045449(regulation of transcription)	0.401439	0.388442
CAND2	cullin-associated and neddylation-dissociated 2 (putative)	GO:0005622(intracellular)|GO:0005634(nucleus)|GO:0016563(transcription activator activity)|GO:0017025(TATA-binding protein binding)|GO:0019941(modification-dependent protein catabolic process)|GO:0045449(regulation of transcription)	0.40221	0.375753
CAPN6	calpain 6	GO:0004198(calcium-dependent cysteine-type endopeptidase activity)|GO:0005622(intracellular)|GO:0006508(proteolysis)	3.23493	2.08515
CBS	cystathionine-beta-synthase	GO:0004122(cystathionine beta-synthase activity)|GO:0005634(nucleus)|GO:0005730(nucleolus)|GO:0005737(cytoplasm)|GO:0005829(cytosol)|GO:0006535(cysteine biosynthetic process from serine)|GO:0006565(L-serine catabolic process)|GO:0008152(metabolic process)|GO:0008652(cellular amino acid biosynthetic process)|GO:0016829(lyase activity)|GO:0019343(cysteine biosynthetic process via cystathionine)|GO:…	3.50147	2.23673
CCDC120	coiled-coil domain containing 120	GO:0005515(protein binding)	2.40859	2.95019
CCDC13	coiled-coil domain containing 13		2.22785	2.03394
CCDC19	coiled-coil domain containing 19	GO:0005625(soluble fraction)|GO:0005739(mitochondrion)	2.26307	2.03414
CCDC26	coiled-coil domain containing 26		2.43175	2.06427
CCDC46	coiled-coil domain containing 46		0.404869	0.44574
CCDC85C	coiled-coil domain containing 85C		0.481909	0.493186
CCND1	cyclin D1	GO:0000082(G1/S transition of mitotic cell cycle)|GO:0000307(cyclin-dependent protein kinase holoenzyme complex)|GO:0000320(re-entry into mitotic cell cycle)|GO:0001889(liver development)|GO:0001934(positive regulation of protein amino acid phosphorylation)|GO:0004672(protein kinase activity)|GO:0005575(cellular_component)|GO:0005622(intracellular)|GO:0005634(nucleus)|GO:0005654(nucleoplasm)|GO:0…	2.05188	2.42865
CCNJL	cyclin J-like	GO:0005634(nucleus)	2.60023	2.15912
CCR1	chemokine (C-C motif) receptor 1	GO:0004872(receptor activity)|GO:0004930(G-protein coupled receptor activity)|GO:0005515(protein binding)|GO:0005886(plasma membrane)|GO:0005887(integral to plasma membrane)|GO:0006935(chemotaxis)|GO:0006954(inflammatory response)|GO:0006955(immune response)|GO:0007155(cell adhesion)|GO:0007187(G-protein signaling, coupled to cyclic nucleotide second messenger)|GO:0007204(elevation of cytosolic c…	2.49876	2.31579
CCR10	chemokine (C-C motif) receptor 10	GO:0004872(receptor activity)|GO:0004930(G-protein coupled receptor activity)|GO:0005515(protein binding)|GO:0005886(plasma membrane)|GO:0005887(integral to plasma membrane)|GO:0006935(chemotaxis)|GO:0007165(signal transduction)|GO:0007186(G-protein coupled receptor protein signaling pathway)|GO:0007204(elevation of cytosolic calcium ion concentration)|GO:0016493(C-C chemokine receptor activity)	2.48715	3.41717
CCR6	chemokine (C-C motif) receptor 6	GO:0004872(receptor activity)|GO:0004930(G-protein coupled receptor activity)|GO:0005515(protein binding)|GO:0005886(plasma membrane)|GO:0005887(integral to plasma membrane)|GO:0006928(cell motion)|GO:0006935(chemotaxis)|GO:0006959(humoral immune response)|GO:0006968(cellular defense response)|GO:0007165(signal transduction)|GO:0007186(G-protein coupled receptor protein signaling pathway)|GO:0007…	0.384215	0.336642
CCR9	chemokine (C-C motif) receptor 9	GO:0004872(receptor activity)|GO:0004930(G-protein coupled receptor activity)|GO:0005515(protein binding)|GO:0005886(plasma membrane)|GO:0005887(integral to plasma membrane)|GO:0006935(chemotaxis)|GO:0006955(immune response)|GO:0006968(cellular defense response)|GO:0007165(signal transduction)|GO:0007186(G-protein coupled receptor protein signaling pathway)|GO:0007204(elevation of cytosolic calci…	0.489368	0.496797
CD14	CD14 molecule	GO:0001530(lipopolysaccharide binding)|GO:0001847(opsonin receptor activity)|GO:0005515(protein binding)|GO:0005576(extracellular region)|GO:0005886(plasma membrane)|GO:0006909(phagocytosis)|GO:0006915(apoptosis)|GO:0006954(inflammatory response)|GO:0006955(immune response)|GO:0007166(cell surface receptor linked signal transduction)|GO:0016019(peptidoglycan receptor activity)|GO:0031225(anchored…	2.46694	2.29776
CD177	CD177 molecule	GO:0005886(plasma membrane)|GO:0031225(anchored to membrane)	12.2113	11.5864
CD1E	CD1e molecule	GO:0005764(lysosome)|GO:0005769(early endosome)|GO:0005770(late endosome)|GO:0005794(Golgi apparatus)|GO:0005887(integral to plasma membrane)|GO:0006955(immune response)|GO:0016020(membrane)|GO:0019882(antigen processing and presentation)	0.479324	0.423084
CD24	CD24 molecule	GO:0001666(response to hypoxia)|GO:0001775(cell activation)|GO:0001959(regulation of cytokine-mediated signaling pathway)|GO:0002237(response to molecule of bacterial origin)|GO:0002329(pre-B cell differentiation)|GO:0002523(leukocyte migration during inflammatory response)|GO:0002768(immune response-regulating cell surface receptor signaling pathway)|GO:0002842(positive regulation of T cell medi…	2.58934	2.65283
CD274	CD274 molecule	GO:0004872(receptor activity)|GO:0005515(protein binding)|GO:0005886(plasma membrane)|GO:0006955(immune response)|GO:0007166(cell surface receptor linked signal transduction)|GO:0008283(cell proliferation)|GO:0009897(external side of plasma membrane)|GO:0016021(integral to membrane)|GO:0042130(negative regulation of T cell proliferation)	2.49161	2.06334
CD36	CD36 molecule (thrombospondin receptor)	GO:0001954(positive regulation of cell-matrix adhesion)|GO:0005041(low-density lipoprotein receptor activity)|GO:0005624(membrane fraction)|GO:0005794(Golgi apparatus)|GO:0005886(plasma membrane)|GO:0005887(integral to plasma membrane)|GO:0006629(lipid metabolic process)|GO:0006810(transport)|GO:0007155(cell adhesion)|GO:0007263(nitric oxide mediated signal transduction)|GO:0007596(blood coagulat…	2.17691	2.0145
CD70	CD70 molecule	GO:0000299(integral to membrane of membrane fraction)|GO:0005125(cytokine activity)|GO:0005164(tumor necrosis factor receptor binding)|GO:0005615(extracellular space)|GO:0005886(plasma membrane)|GO:0005887(integral to plasma membrane)|GO:0006917(induction of apoptosis)|GO:0006955(immune response)|GO:0007165(signal transduction)|GO:0007267(cell-cell signaling)|GO:0008283(cell proliferation)	0.447411	0.472927
CDA	cytidine deaminase	GO:0001882(nucleoside binding)|GO:0004126(cytidine deaminase activity)|GO:0005576(extracellular region)|GO:0005829(cytosol)|GO:0007166(cell surface receptor linked signal transduction)|GO:0008270(zinc ion binding)|GO:0008655(pyrimidine salvage)|GO:0009972(cytidine deamination)|GO:0016787(hydrolase activity)|GO:0019858(cytosine metabolic process)|GO:0030308(negative regulation of cell growth)|GO:0…	3.56625	2.96542
CDC42EP5	CDC42 effector protein (Rho GTPase binding) 5	GO:0005515(protein binding)|GO:0005737(cytoplasm)|GO:0005856(cytoskeleton)|GO:0005886(plasma membrane)|GO:0007254(JNK cascade)|GO:0007266(Rho protein signal transduction)|GO:0008360(regulation of cell shape)|GO:0017049(GTP-Rho binding)|GO:0019898(extrinsic to membrane)|GO:0030838(positive regulation of actin filament polymerization)|GO:0031274(positive regulation of pseudopodium assembly)	2.10845	2.21886
CDCA3	cell division cycle associated 3	GO:0003674(molecular_function)|GO:0005575(cellular_component)|GO:0005737(cytoplasm)|GO:0005829(cytosol)|GO:0007049(cell cycle)|GO:0007067(mitosis)|GO:0008150(biological_process)|GO:0019941(modification-dependent protein catabolic process)|GO:0051301(cell division)	2.86002	2.14708
CDH24	cadherin-like 24	GO:0005509(calcium ion binding)|GO:0005515(protein binding)|GO:0005886(plasma membrane)|GO:0005911(cell-cell junction)|GO:0007156(homophilic cell adhesion)|GO:0016021(integral to membrane)	2.56324	3.4243
CDSN	corneodesmosin	GO:0001533(cornified envelope)|GO:0003674(molecular_function)|GO:0005576(extracellular region)|GO:0008544(epidermis development)|GO:0016337(cell-cell adhesion)|GO:0030057(desmosome)|GO:0030216(keratinocyte differentiation)|GO:0042803(protein homodimerization activity)	2.52525	3.00711
CEACAM1	carcinoembryonic antigen-related cell adhesion molecule 1 (biliary glycoprotein)	GO:0001525(angiogenesis)|GO:0003674(molecular_function)|GO:0005576(extracellular region)|GO:0005624(membrane fraction)|GO:0005886(plasma membrane)|GO:0005887(integral to plasma membrane)|GO:0007156(homophilic cell adhesion)|GO:0007229(integrin-mediated signaling pathway)|GO:0016477(cell migration)	3.75347	3.93221
CEACAM3	carcinoembryonic antigen-related cell adhesion molecule 3	GO:0016020(membrane)|GO:0016021(integral to membrane)	4.36824	3.66032
CEACAM4	carcinoembryonic antigen-related cell adhesion molecule 4	GO:0005624(membrane fraction)|GO:0005887(integral to plasma membrane)|GO:0016020(membrane)	2.57738	2.40595
CEACAM6	carcinoembryonic antigen-related cell adhesion molecule 6 (non-specific cross reacting antigen)	GO:0005886(plasma membrane)|GO:0005887(integral to plasma membrane)|GO:0007165(signal transduction)|GO:0007267(cell-cell signaling)|GO:0031225(anchored to membrane)	28.4723	26.544
CEACAM7	carcinoembryonic antigen-related cell adhesion molecule 7	GO:0005886(plasma membrane)|GO:0016021(integral to membrane)|GO:0031225(anchored to membrane)	4.00593	4.67204
CEACAM8	carcinoembryonic antigen-related cell adhesion molecule 8	GO:0005615(extracellular space)|GO:0005886(plasma membrane)|GO:0005887(integral to plasma membrane)|GO:0006955(immune response)|GO:0031225(anchored to membrane)	33.6822	32.5624
CEBPB	CCAAT/enhancer binding protein (C/EBP), beta	GO:0001892(embryonic placenta development)|GO:0003705(RNA polymerase II transcription factor activity, enhancer binding)|GO:0005634(nucleus)|GO:0005737(cytoplasm)|GO:0006355(regulation of transcription, DNA-dependent)|GO:0006916(anti-apoptosis)|GO:0006917(induction of apoptosis)|GO:0006953(acute-phase response)|GO:0006954(inflammatory response)|GO:0006955(immune response)|GO:0016363(nuclear matri…	2.39039	2.14011
CEBPE	CCAAT/enhancer binding protein (C/EBP), epsilon	GO:0003700(transcription factor activity)|GO:0005634(nucleus)|GO:0005730(nucleolus)|GO:0006355(regulation of transcription, DNA-dependent)|GO:0006909(phagocytosis)|GO:0016563(transcription activator activity)|GO:0030099(myeloid cell differentiation)|GO:0030225(macrophage differentiation)|GO:0042089(cytokine biosynthetic process)|GO:0042742(defense response to bacterium)|GO:0042803(protein homodim…	2.33501	2.02174
CECR6	cat eye syndrome chromosome region, candidate 6		2.44799	2.05376
CENPB	centromere protein B, 80kDa	GO:0000775(chromosome, centromeric region)|GO:0003677(DNA binding)|GO:0003682(chromatin binding)|GO:0003696(satellite DNA binding)|GO:0005634(nucleus)|GO:0005694(chromosome)|GO:0045449(regulation of transcription)	2.10661	2.18461
CES1	carboxylesterase 1 (monocyte/macrophage serine esterase 1)	GO:0004091(carboxylesterase activity)|GO:0005783(endoplasmic reticulum)|GO:0005788(endoplasmic reticulum lumen)|GO:0008152(metabolic process)|GO:0009636(response to toxin)|GO:0016787(hydrolase activity)	2.56085	2.76351
CHI3L1	chitinase 3-like 1 (cartilage glycoprotein-39)	GO:0003824(catalytic activity)|GO:0004568(chitinase activity)|GO:0005201(extracellular matrix structural constituent)|GO:0005529(sugar binding)|GO:0005576(extracellular region)|GO:0005578(proteinaceous extracellular matrix)|GO:0005615(extracellular space)|GO:0005975(carbohydrate metabolic process)|GO:0006032(chitin catabolic process)|GO:0043169(cation binding)	2.45692	2.26937
CHIT1	chitinase 1 (chitotriosidase)	GO:0000272(polysaccharide catabolic process)|GO:0004568(chitinase activity)|GO:0005576(extracellular region)|GO:0005615(extracellular space)|GO:0005764(lysosome)|GO:0005975(carbohydrate metabolic process)|GO:0006032(chitin catabolic process)|GO:0006955(immune response)|GO:0008061(chitin binding)|GO:0008152(metabolic process)|GO:0009617(response to bacterium)|GO:0043169(cation binding)	3.98145	4.06991
CHST13	carbohydrate (chondroitin 4) sulfotransferase 13	GO:0001537(N-acetylgalactosamine 4-O-sulfotransferase activity)|GO:0005794(Golgi apparatus)|GO:0016020(membrane)|GO:0016021(integral to membrane)|GO:0016051(carbohydrate biosynthetic process)|GO:0016740(transferase activity)|GO:0030206(chondroitin sulfate biosynthetic process)|GO:0047756(chondroitin 4-sulfotransferase activity)	2.12779	2.00984
CLCNKA	chloride channel Ka	GO:0005244(voltage-gated ion channel activity)|GO:0005247(voltage-gated chloride channel activity)|GO:0005887(integral to plasma membrane)|GO:0006811(ion transport)|GO:0006821(chloride transport)|GO:0007588(excretion)|GO:0016020(membrane)|GO:0031404(chloride ion binding)|GO:0034707(chloride channel complex)|GO:0055085(transmembrane transport)	2.45529	2.13208
CLEC4D	C-type lectin domain family 4, member D	GO:0005488(binding)|GO:0005529(sugar binding)|GO:0006955(immune response)|GO:0016020(membrane)|GO:0016021(integral to membrane)	5.29951	4.41434
CLEC5A	C-type lectin domain family 5, member A	GO:0005488(binding)|GO:0005529(sugar binding)|GO:0005887(integral to plasma membrane)|GO:0006955(immune response)|GO:0006968(cellular defense response)|GO:0007165(signal transduction)|GO:0016020(membrane)	2.49664	2.38084
CLEC7A	C-type lectin domain family 7, member A	GO:0001846(opsonin binding)|GO:0001874(zymosan receptor activity)|GO:0001879(detection of yeast)|GO:0002238(response to molecule of fungal origin)|GO:0002752(cell surface pattern recognition receptor signaling pathway)|GO:0005488(binding)|GO:0005529(sugar binding)|GO:0005737(cytoplasm)|GO:0006910(phagocytosis, recognition)|GO:0006911(phagocytosis, engulfment)|GO:0006954(inflammatory response)|GO:…	2.42482	2.01535
CLECL1	C-type lectin-like 1	GO:0005488(binding)|GO:0005529(sugar binding)|GO:0005886(plasma membrane)|GO:0016021(integral to membrane)	0.480063	0.454648
CLPS	colipase, pancreatic	GO:0005576(extracellular region)|GO:0007586(digestion)|GO:0008047(enzyme activator activity)|GO:0009791(post-embryonic development)|GO:0016042(lipid catabolic process)|GO:0032094(response to food)|GO:0043085(positive regulation of catalytic activity)	2.10896	2.47312
CMBL	carboxymethylenebutenolidase homolog (Pseudomonas)	GO:0005515(protein binding)|GO:0016787(hydrolase activity)	3.46304	3.00676
CMTM2	CKLF-like MARVEL transmembrane domain containing 2	GO:0005125(cytokine activity)|GO:0005615(extracellular space)|GO:0006935(chemotaxis)|GO:0016020(membrane)|GO:0016021(integral to membrane)	2.91973	2.62346
CNR2	cannabinoid receptor 2 (macrophage)	GO:0004872(receptor activity)|GO:0004949(cannabinoid receptor activity)|GO:0005886(plasma membrane)|GO:0005887(integral to plasma membrane)|GO:0006954(inflammatory response)|GO:0006955(immune response)|GO:0007165(signal transduction)|GO:0007187(G-protein signaling, coupled to cyclic nucleotide second messenger)|GO:0007610(behavior)|GO:0030425(dendrite)|GO:0042995(cell projection)|GO:0043204(perik…	0.463512	0.46312
CNTNAP1	contactin associated protein 1	GO:0004872(receptor activity)|GO:0005070(SH3/SH2 adaptor activity)|GO:0005102(receptor binding)|GO:0005887(integral to plasma membrane)|GO:0007155(cell adhesion)|GO:0007165(signal transduction)|GO:0016020(membrane)|GO:0017124(SH3 domain binding)|GO:0033270(paranode region of axon)	2.34695	2.08466
COCH	coagulation factor C homolog, cochlin (Limulus polyphemus)	GO:0005576(extracellular region)|GO:0005578(proteinaceous extracellular matrix)|GO:0007605(sensory perception of sound)	0.315878	0.263186
COL13A1	collagen, type XIII, alpha 1	GO:0001763(morphogenesis of a branching structure)|GO:0001958(endochondral ossification)|GO:0005201(extracellular matrix structural constituent)|GO:0005515(protein binding)|GO:0005600(collagen type XIII)|GO:0005886(plasma membrane)|GO:0007160(cell-matrix adhesion)|GO:0007275(multicellular organismal development)|GO:0008150(biological_process)|GO:0008201(heparin binding)|GO:0016021(integral to mem…	0.32903	0.338923
COL17A1	collagen, type XVII, alpha 1	GO:0005576(extracellular region)|GO:0005604(basement membrane)|GO:0005887(integral to plasma membrane)|GO:0005911(cell-cell junction)|GO:0007160(cell-matrix adhesion)|GO:0008544(epidermis development)|GO:0016020(membrane)|GO:0030056(hemidesmosome)	38.1599	35.1109
COL27A1	collagen, type XXVII, alpha 1	GO:0005201(extracellular matrix structural constituent)|GO:0005576(extracellular region)|GO:0005581(collagen)|GO:0007155(cell adhesion)	2.01751	2.36373
COL4A3	collagen, type IV, alpha 3 (Goodpasture antigen)	GO:0005178(integrin binding)|GO:0005201(extracellular matrix structural constituent)|GO:0005515(protein binding)|GO:0005576(extracellular region)|GO:0005581(collagen)|GO:0005587(collagen type IV)|GO:0006917(induction of apoptosis)|GO:0006919(activation of caspase activity)|GO:0007155(cell adhesion)|GO:0007166(cell surface receptor linked signal transduction)|GO:0007605(sensory perception of sound…	0.306026	0.34479
COL9A3	collagen, type IX, alpha 3	GO:0005576(extracellular region)|GO:0005578(proteinaceous extracellular matrix)|GO:0005594(collagen type IX)|GO:0030020(extracellular matrix structural constituent conferring tensile strength)	2.15879	2.16991
CORIN	corin, serine peptidase	GO:0004252(serine-type endopeptidase activity)|GO:0005044(scavenger receptor activity)|GO:0005886(plasma membrane)|GO:0005887(integral to plasma membrane)|GO:0006508(proteolysis)|GO:0006629(lipid metabolic process)|GO:0008217(regulation of blood pressure)|GO:0008233(peptidase activity)|GO:0009653(anatomical structure morphogenesis)|GO:0009986(cell surface)|GO:0051605(protein maturation by peptide…	2.81829	2.10434
CORT	cortistatin	GO:0001664(G-protein-coupled receptor binding)|GO:0005184(neuropeptide hormone activity)|GO:0005576(extracellular region)|GO:0005625(soluble fraction)|GO:0007193(inhibition of adenylate cyclase activity by G-protein signaling)|GO:0007268(synaptic transmission)	2.22521	2.54719
CPA5	carboxypeptidase A5	GO:0004181(metallocarboxypeptidase activity)|GO:0005576(extracellular region)|GO:0006508(proteolysis)|GO:0008233(peptidase activity)|GO:0008237(metallopeptidase activity)|GO:0008270(zinc ion binding)|GO:0046872(metal ion binding)	2.98693	2.24094
CPEB4	cytoplasmic polyadenylation element binding protein 4	GO:0000166(nucleotide binding)|GO:0003723(RNA binding)	2.07901	2.07827
CPLX2	complexin 2	GO:0005737(cytoplasm)|GO:0005829(cytosol)|GO:0006836(neurotransmitter transport)|GO:0006904(vesicle docking during exocytosis)|GO:0019905(syntaxin binding)|GO:0043303(mast cell degranulation)	2.38054	2.96652
CPLX3	complexin 3	GO:0005326(neurotransmitter transporter activity)|GO:0005829(cytosol)|GO:0005886(plasma membrane)|GO:0006836(neurotransmitter transport)|GO:0016079(synaptic vesicle exocytosis)|GO:0019905(syntaxin binding)|GO:0030054(cell junction)|GO:0030073(insulin secretion)|GO:0031225(anchored to membrane)|GO:0045202(synapse)|GO:0046928(regulation of neurotransmitter secretion)	2.6699	2.79621
CPNE6	copine VI (neuronal)	GO:0001786(phosphatidylserine binding)|GO:0005215(transporter activity)|GO:0005509(calcium ion binding)|GO:0005624(membrane fraction)|GO:0006629(lipid metabolic process)|GO:0007268(synaptic transmission)|GO:0007399(nervous system development)|GO:0016192(vesicle-mediated transport)|GO:0030424(axon)|GO:0030425(dendrite)	2.1297	2.68463
CPNE7	copine VII	GO:0005215(transporter activity)|GO:0006629(lipid metabolic process)	2.17565	2.13433
CR1	complement component (3b/4b) receptor 1 (Knops blood group)	GO:0004872(receptor activity)|GO:0004875(complement receptor activity)|GO:0005887(integral to plasma membrane)|GO:0006958(complement activation, classical pathway)|GO:0016020(membrane)|GO:0045087(innate immune response)	3.36201	3.20191
CRB2	crumbs homolog 2 (Drosophila)	GO:0005509(calcium ion binding)|GO:0005576(extracellular region)|GO:0005886(plasma membrane)|GO:0007601(visual perception)|GO:0016021(integral to membrane)|GO:0050896(response to stimulus)	2.11541	2.63904
CREB5	cAMP responsive element binding protein 5	GO:0003700(transcription factor activity)|GO:0005622(intracellular)|GO:0005634(nucleus)|GO:0006366(transcription from RNA polymerase II promoter)|GO:0008270(zinc ion binding)|GO:0043565(sequence-specific DNA binding)|GO:0045893(positive regulation of transcription, DNA-dependent)|GO:0046872(metal ion binding)|GO:0046983(protein dimerization activity)	3.35355	3.41737
CRIM1	cysteine rich transmembrane BMP regulator 1 (chordin-like)	GO:0001558(regulation of cell growth)|GO:0004857(enzyme inhibitor activity)|GO:0004867(serine-type endopeptidase inhibitor activity)|GO:0005010(insulin-like growth factor receptor activity)|GO:0005520(insulin-like growth factor binding)|GO:0005576(extracellular region)|GO:0005886(plasma membrane)|GO:0007399(nervous system development)|GO:0016021(integral to membrane)	0.308035	0.214073
CRISP2	cysteine-rich secretory protein 2	GO:0005576(extracellular region)|GO:0005615(extracellular space)	9.86939	8.09765
CRISP3	cysteine-rich secretory protein 3	GO:0003674(molecular_function)|GO:0005576(extracellular region)|GO:0005578(proteinaceous extracellular matrix)|GO:0042581(specific granule)|GO:0045087(innate immune response)	25.7186	18.1509
CRISPLD2	cysteine-rich secretory protein LCCL domain containing 2	GO:0005576(extracellular region)|GO:0008201(heparin binding)|GO:0030133(transport vesicle)|GO:0030198(extracellular matrix organization)|GO:0031012(extracellular matrix)	2.73982	2.571
CSF2RA	colony stimulating factor 2 receptor, alpha, low-affinity (granulocyte-macrophage)	GO:0004872(receptor activity)|GO:0004896(cytokine receptor activity)|GO:0005515(protein binding)|GO:0005576(extracellular region)|GO:0005886(plasma membrane)|GO:0005887(integral to plasma membrane)	2.43238	2.20567
CSF2RB	colony stimulating factor 2 receptor, beta, low-affinity (granulocyte-macrophage)	GO:0004872(receptor activity)|GO:0004912(interleukin-3 receptor activity)|GO:0004914(interleukin-5 receptor activity)|GO:0005515(protein binding)|GO:0007165(signal transduction)|GO:0007585(respiratory gaseous exchange)|GO:0016020(membrane)|GO:0019221(cytokine-mediated signaling pathway)|GO:0030526(granulocyte macrophage colony-stimulating factor receptor complex)	2.75515	2.45409
CSF3R	colony stimulating factor 3 receptor (granulocyte)	GO:0004872(receptor activity)|GO:0004896(cytokine receptor activity)|GO:0005515(protein binding)|GO:0005576(extracellular region)|GO:0005886(plasma membrane)|GO:0005887(integral to plasma membrane)|GO:0006952(defense response)|GO:0007155(cell adhesion)|GO:0007165(signal transduction)	2.8363	2.84343
CTAGE1	cutaneous T-cell lymphoma-associated antigen 1	GO:0005575(cellular_component)|GO:0008150(biological_process)|GO:0016020(membrane)|GO:0016021(integral to membrane)	2.36068	2.13129
CTBS	chitobiase, di-N-acetyl-	GO:0004568(chitinase activity)|GO:0005764(lysosome)|GO:0005975(carbohydrate metabolic process)|GO:0006032(chitin catabolic process)|GO:0008152(metabolic process)|GO:0009313(oligosaccharide catabolic process)|GO:0043169(cation binding)	2.14396	2.06061
CTF1	cardiotrophin 1	GO:0005125(cytokine activity)|GO:0005146(leukemia inhibitory factor receptor binding)|GO:0005576(extracellular region)|GO:0005615(extracellular space)|GO:0007267(cell-cell signaling)|GO:0007399(nervous system development)|GO:0007517(muscle organ development)|GO:0008284(positive regulation of cell proliferation)|GO:0048666(neuron development)|GO:0048861(leukemia inhibitory factor signaling pathway)	2.15563	2.05764
CTSE	cathepsin E	GO:0004190(aspartic-type endopeptidase activity)|GO:0005768(endosome)|GO:0006508(proteolysis)|GO:0007586(digestion)|GO:0008233(peptidase activity)|GO:0019886(antigen processing and presentation of exogenous peptide antigen via MHC class II)|GO:0042803(protein homodimerization activity)	2.30048	2.32701
CTSG	cathepsin G	GO:0004252(serine-type endopeptidase activity)|GO:0005515(protein binding)|GO:0005886(plasma membrane)|GO:0006508(proteolysis)|GO:0006955(immune response)|GO:0008233(peptidase activity)|GO:0009986(cell surface)|GO:0042742(defense response to bacterium)	9.75822	7.49548
CTSL1	cathepsin L1	GO:0004177(aminopeptidase activity)|GO:0004197(cysteine-type endopeptidase activity)|GO:0005576(extracellular region)|GO:0005625(soluble fraction)|GO:0005764(lysosome)|GO:0006508(proteolysis)|GO:0008233(peptidase activity)|GO:0030984(kininogen binding)|GO:0042277(peptide binding)	2.37379	2.22764
CUX2	cut-like homeobox 2	GO:0003700(transcription factor activity)|GO:0005634(nucleus)|GO:0016564(transcription repressor activity)|GO:0043565(sequence-specific DNA binding)|GO:0045892(negative regulation of transcription, DNA-dependent)	0.474581	0.394012
CXADR	coxsackie virus and adenovirus receptor	GO:0004872(receptor activity)|GO:0005515(protein binding)|GO:0005576(extracellular region)|GO:0005737(cytoplasm)|GO:0005794(Golgi apparatus)|GO:0005886(plasma membrane)|GO:0005887(integral to plasma membrane)|GO:0005911(cell-cell junction)|GO:0005912(adherens junction)|GO:0005923(tight junction)|GO:0007005(mitochondrion organization)|GO:0007155(cell adhesion)|GO:0007507(heart development)|GO:0044…	0.412042	0.454855
CXCL1	chemokine (C-X-C motif) ligand 1 (melanoma growth stimulating activity, alpha)	GO:0005576(extracellular region)|GO:0005615(extracellular space)|GO:0006935(chemotaxis)|GO:0006954(inflammatory response)|GO:0006955(immune response)|GO:0007186(G-protein coupled receptor protein signaling pathway)|GO:0007242(intracellular signaling cascade)|GO:0007399(nervous system development)|GO:0008009(chemokine activity)|GO:0008047(enzyme activator activity)|GO:0008083(growth factor activit…	3.07499	3.07586
CXCL10	chemokine (C-X-C motif) ligand 10	GO:0005576(extracellular region)|GO:0005615(extracellular space)|GO:0006935(chemotaxis)|GO:0006954(inflammatory response)|GO:0006955(immune response)|GO:0007186(G-protein coupled receptor protein signaling pathway)|GO:0007267(cell-cell signaling)|GO:0007517(muscle organ development)|GO:0008009(chemokine activity)|GO:0008015(blood circulation)|GO:0008284(positive regulation of cell proliferation)|…	2.45917	2.15171
CXCL6	chemokine (C-X-C motif) ligand 6 (granulocyte chemotactic protein 2)	GO:0005576(extracellular region)|GO:0005615(extracellular space)|GO:0006935(chemotaxis)|GO:0006954(inflammatory response)|GO:0006955(immune response)|GO:0007165(signal transduction)|GO:0007186(G-protein coupled receptor protein signaling pathway)|GO:0007267(cell-cell signaling)|GO:0008009(chemokine activity)|GO:0008201(heparin binding)	2.10371	2.02835
CYBB	cytochrome b-245, beta polypeptide	GO:0005244(voltage-gated ion channel activity)|GO:0005515(protein binding)|GO:0005737(cytoplasm)|GO:0005739(mitochondrion)|GO:0005886(plasma membrane)|GO:0006811(ion transport)|GO:0006954(inflammatory response)|GO:0009055(electron carrier activity)|GO:0016175(superoxide-generating NADPH oxidase activity)|GO:0016491(oxidoreductase activity)|GO:0020037(heme binding)|GO:0022900(electron transport ch…	2.12826	2.23215
CYP11B1	cytochrome P450, family 11, subfamily B, polypeptide 1	GO:0004497(monooxygenase activity)|GO:0004507(steroid 11-beta-monooxygenase activity)|GO:0005739(mitochondrion)|GO:0005743(mitochondrial inner membrane)|GO:0006629(lipid metabolic process)|GO:0006950(response to stress)|GO:0006955(immune response)|GO:0008217(regulation of blood pressure)|GO:0009055(electron carrier activity)|GO:0016020(membrane)|GO:0020037(heme binding)|GO:0032342(aldosterone bio…	2.4776	2.9718
CYP4A11	cytochrome P450, family 4, subfamily A, polypeptide 11	GO:0005783(endoplasmic reticulum)|GO:0005789(endoplasmic reticulum membrane)|GO:0005792(microsome)|GO:0006631(fatty acid metabolic process)|GO:0008393(fatty acid (omega-1)-hydroxylase activity)|GO:0009055(electron carrier activity)|GO:0016020(membrane)|GO:0018685(alkane 1-monooxygenase activity)|GO:0019825(oxygen binding)|GO:0019898(extrinsic to membrane)|GO:0020037(heme binding)|GO:0046872(metal…	2.42453	2.32937
CYP4F12	cytochrome P450, family 4, subfamily F, polypeptide 12	GO:0004497(monooxygenase activity)|GO:0005783(endoplasmic reticulum)|GO:0005789(endoplasmic reticulum membrane)|GO:0005792(microsome)|GO:0009055(electron carrier activity)|GO:0016020(membrane)|GO:0016021(integral to membrane)|GO:0019825(oxygen binding)|GO:0020037(heme binding)|GO:0046872(metal ion binding)|GO:0055114(oxidation reduction)|GO:0070330(aromatase activity)	2.64623	2.48235
CYP4F2	cytochrome P450, family 4, subfamily F, polypeptide 2	GO:0004497(monooxygenase activity)|GO:0005515(protein binding)|GO:0005783(endoplasmic reticulum)|GO:0005789(endoplasmic reticulum membrane)|GO:0005792(microsome)|GO:0006691(leukotriene metabolic process)|GO:0009055(electron carrier activity)|GO:0016020(membrane)|GO:0019825(oxygen binding)|GO:0019898(extrinsic to membrane)|GO:0020037(heme binding)|GO:0046872(metal ion binding)|GO:0050051(leukotrie…	3.0996	2.98545
CYP4F3	cytochrome P450, family 4, subfamily F, polypeptide 3	GO:0004497(monooxygenase activity)|GO:0005783(endoplasmic reticulum)|GO:0005789(endoplasmic reticulum membrane)|GO:0005792(microsome)|GO:0006691(leukotriene metabolic process)|GO:0009055(electron carrier activity)|GO:0016020(membrane)|GO:0016021(integral to membrane)|GO:0019825(oxygen binding)|GO:0020037(heme binding)|GO:0046872(metal ion binding)|GO:0050051(leukotriene-B4 20-monooxygenase activi…	2.72512	2.60631
CYP4F8	cytochrome P450, family 4, subfamily F, polypeptide 8	GO:0005515(protein binding)|GO:0005783(endoplasmic reticulum)|GO:0005792(microsome)|GO:0006693(prostaglandin metabolic process)|GO:0008393(fatty acid (omega-1)-hydroxylase activity)|GO:0009055(electron carrier activity)|GO:0016020(membrane)|GO:0016021(integral to membrane)|GO:0020037(heme binding)|GO:0046872(metal ion binding)|GO:0055114(oxidation reduction)|GO:0070330(aromatase activity)	3.07591	2.98487
DACH1	dachshund homolog 1 (Drosophila)	GO:0000166(nucleotide binding)|GO:0003700(transcription factor activity)|GO:0005515(protein binding)|GO:0005634(nucleus)|GO:0005667(transcription factor complex)|GO:0005737(cytoplasm)|GO:0007275(multicellular organismal development)|GO:0045449(regulation of transcription)	2.33814	2.11631
DARC	Duffy blood group, chemokine receptor	GO:0004930(G-protein coupled receptor activity)|GO:0004950(chemokine receptor activity)|GO:0005886(plasma membrane)|GO:0006952(defense response)|GO:0007165(signal transduction)|GO:0007186(G-protein coupled receptor protein signaling pathway)|GO:0016021(integral to membrane)	2.11815	2.06922
DAZ2	deleted in azoospermia 2	GO:0000166(nucleotide binding)|GO:0003723(RNA binding)|GO:0005634(nucleus)|GO:0005737(cytoplasm)|GO:0007275(multicellular organismal development)|GO:0007283(spermatogenesis)|GO:0007338(single fertilization)|GO:0030154(cell differentiation)	2.46122	2.08845
DBF4B	DBF4 homolog B (S. cerevisiae)	GO:0003676(nucleic acid binding)|GO:0005634(nucleus)|GO:0007049(cell cycle)|GO:0008270(zinc ion binding)|GO:0046872(metal ion binding)	2.15242	2.17697
DBP	D site of albumin promoter (albumin D-box) binding protein	GO:0003700(transcription factor activity)|GO:0003702(RNA polymerase II transcription factor activity)|GO:0005634(nucleus)|GO:0006357(regulation of transcription from RNA polymerase II promoter)|GO:0042127(regulation of cell proliferation)|GO:0043565(sequence-specific DNA binding)|GO:0046983(protein dimerization activity)|GO:0048511(rhythmic process)	2.63967	3.09307
DCAF12	DDB1 and CUL4 associated factor 12	GO:0005737(cytoplasm)|GO:0005813(centrosome)	2.42379	2.61988
DCHS1	dachsous 1 (Drosophila)	GO:0005509(calcium ion binding)|GO:0005515(protein binding)|GO:0005886(plasma membrane)|GO:0007155(cell adhesion)|GO:0007156(homophilic cell adhesion)|GO:0016021(integral to membrane)|GO:0016339(calcium-dependent cell-cell adhesion)	0.456898	0.46579
DEFA1	defensin, alpha 1	GO:0005576(extracellular region)|GO:0005615(extracellular space)|GO:0006935(chemotaxis)|GO:0006955(immune response)|GO:0009615(response to virus)|GO:0031640(killing of cells of another organism)|GO:0042742(defense response to bacterium)|GO:0050832(defense response to fungus)	7.79589	4.76401
DEFA3	defensin, alpha 3, neutrophil-specific	GO:0005576(extracellular region)|GO:0005615(extracellular space)|GO:0009615(response to virus)|GO:0031640(killing of cells of another organism)|GO:0042742(defense response to bacterium)|GO:0050832(defense response to fungus)	6.95927	7.53449
DEFA4	defensin, alpha 4, corticostatin	GO:0005576(extracellular region)|GO:0005615(extracellular space)|GO:0031640(killing of cells of another organism)|GO:0042742(defense response to bacterium)|GO:0050832(defense response to fungus)	27.886	26.9523
DEFT1P2	defensin, theta 1 pseudogene 2		4.39521	4.66195
DENND5B	DENN/MADD domain containing 5B	GO:0016020(membrane)|GO:0016021(integral to membrane)	0.403188	0.406371
DGAT2	diacylglycerol O-acyltransferase homolog 2 (mouse)	GO:0003846(2-acylglycerol O-acyltransferase activity)|GO:0004144(diacylglycerol O-acyltransferase activity)|GO:0005624(membrane fraction)|GO:0005783(endoplasmic reticulum)|GO:0005792(microsome)|GO:0006071(glycerol metabolic process)|GO:0008415(acyltransferase activity)|GO:0008610(lipid biosynthetic process)|GO:0016020(membrane)|GO:0016021(integral to membrane)|GO:0016740(transferase activity)|GO:…	3.53886	3.54489
DHRS13	dehydrogenase/reductase (SDR family) member 13	GO:0005488(binding)|GO:0005576(extracellular region)|GO:0016491(oxidoreductase activity)|GO:0055114(oxidation reduction)	2.42551	2.3398
DIO2	deiodinase, iodothyronine, type II	GO:0001514(selenocysteine incorporation)|GO:0004800(thyroxine 5'-deiodinase activity)|GO:0005886(plasma membrane)|GO:0006590(thyroid hormone generation)|GO:0008430(selenium binding)|GO:0009409(response to cold)|GO:0016021(integral to membrane)|GO:0042404(thyroid hormone catabolic process)|GO:0042446(hormone biosynthetic process)|GO:0055114(oxidation reduction)	2.17028	2.41574
DKK3	dickkopf homolog 3 (Xenopus laevis)	GO:0005576(extracellular region)|GO:0005615(extracellular space)|GO:0007275(multicellular organismal development)|GO:0009653(anatomical structure morphogenesis)|GO:0030178(negative regulation of Wnt receptor signaling pathway)	0.401651	0.36996
DLG5	discs, large homolog 5 (Drosophila)	GO:0005515(protein binding)|GO:0005622(intracellular)|GO:0005737(cytoplasm)|GO:0005886(plasma membrane)|GO:0005913(cell-cell adherens junction)|GO:0007242(intracellular signaling cascade)|GO:0008285(negative regulation of cell proliferation)|GO:0016337(cell-cell adhesion)|GO:0019898(extrinsic to membrane)|GO:0030054(cell junction)|GO:0030159(receptor signaling complex scaffold activity)|GO:004298…	0.457452	0.47474
DLX2	distal-less homeobox 2	GO:0000122(negative regulation of transcription from RNA polymerase II promoter)|GO:0003682(chromatin binding)|GO:0003700(transcription factor activity)|GO:0003727(single-stranded RNA binding)|GO:0005515(protein binding)|GO:0005634(nucleus)|GO:0006355(regulation of transcription, DNA-dependent)|GO:0007275(multicellular organismal development)|GO:0007420(brain development)|GO:0009954(proximal/dist…	2.17654	2.65154
DLX3	distal-less homeobox 3	GO:0001568(blood vessel development)|GO:0001890(placenta development)|GO:0003700(transcription factor activity)|GO:0005634(nucleus)|GO:0006355(regulation of transcription, DNA-dependent)|GO:0007275(multicellular organismal development)|GO:0043565(sequence-specific DNA binding)	2.94549	2.51498
DMD	dystrophin	GO:0003779(actin binding)|GO:0005200(structural constituent of cytoskeleton)|GO:0005509(calcium ion binding)|GO:0005515(protein binding)|GO:0005626(insoluble fraction)|GO:0005634(nucleus)|GO:0005737(cytoplasm)|GO:0005792(microsome)|GO:0005856(cytoskeleton)|GO:0007517(muscle organ development)|GO:0007519(skeletal muscle tissue development)|GO:0008270(zinc ion binding)|GO:0008307(structural constit…	0.336106	0.330068
DNAH10	dynein, axonemal, heavy chain 10	GO:0000166(nucleotide binding)|GO:0003777(microtubule motor activity)|GO:0005524(ATP binding)|GO:0005874(microtubule)|GO:0005929(cilium)|GO:0007018(microtubule-based movement)|GO:0016887(ATPase activity)|GO:0030286(dynein complex)|GO:0035085(cilium axoneme)	2.8699	2.33885
DNAH11	dynein, axonemal, heavy chain 11	GO:0000166(nucleotide binding)|GO:0003777(microtubule motor activity)|GO:0005524(ATP binding)|GO:0005858(axonemal dynein complex)|GO:0005874(microtubule)|GO:0007018(microtubule-based movement)|GO:0016887(ATPase activity)	2.70225	2.09271
DNASE1L3	deoxyribonuclease I-like 3	GO:0003677(DNA binding)|GO:0004520(endodeoxyribonuclease activity)|GO:0005509(calcium ion binding)|GO:0005634(nucleus)|GO:0006308(DNA catabolic process)|GO:0006309(DNA fragmentation involved in apoptosis)|GO:0006915(apoptosis)|GO:0016787(hydrolase activity)	0.414694	0.379931
DOCK3	dedicator of cytokinesis 3	GO:0005085(guanyl-nucleotide exchange factor activity)|GO:0005515(protein binding)|GO:0005525(GTP binding)|GO:0005625(soluble fraction)|GO:0005737(cytoplasm)|GO:0017124(SH3 domain binding)|GO:0051020(GTPase binding)	0.470288	0.47823
DOCK4	dedicator of cytokinesis 4	GO:0005085(guanyl-nucleotide exchange factor activity)|GO:0005515(protein binding)|GO:0016020(membrane)|GO:0017124(SH3 domain binding)|GO:0019898(extrinsic to membrane)|GO:0030165(PDZ domain binding)|GO:0030675(Rac GTPase activator activity)|GO:0032420(stereocilium)|GO:0048365(Rac GTPase binding)	3.99334	3.93142
DOCK5	dedicator of cytokinesis 5	GO:0005085(guanyl-nucleotide exchange factor activity)|GO:0005737(cytoplasm)	2.48996	2.08348
DOK3	docking protein 3	GO:0005158(insulin receptor binding)|GO:0005515(protein binding)|GO:0005737(cytoplasm)|GO:0005886(plasma membrane)|GO:0007265(Ras protein signal transduction)	2.58552	2.30738
DOK7	docking protein 7	GO:0005158(insulin receptor binding)|GO:0005886(plasma membrane)|GO:0019898(extrinsic to membrane)|GO:0030054(cell junction)|GO:0045202(synapse)	0.285614	0.314809
DPY19L1P1	dpy-19-like 1 pseudogene 1 (C. elegans)		2.98744	2.61754
DPYS	dihydropyrimidinase	GO:0002058(uracil binding)|GO:0002059(thymine binding)|GO:0004157(dihydropyrimidinase activity)|GO:0005625(soluble fraction)|GO:0005829(cytosol)|GO:0006210(thymine catabolic process)|GO:0006212(uracil catabolic process)|GO:0008270(zinc ion binding)|GO:0016597(amino acid binding)|GO:0016810(hydrolase activity, acting on carbon-nitrogen (but not peptide) bonds)|GO:0019482(beta-alanine metabolic pro…	2.47497	2.58549
DRD4	dopamine receptor D4	GO:0000187(activation of MAPK activity)|GO:0001593(dopamine D4 receptor activity)|GO:0001662(behavioral fear response)|GO:0001975(response to amphetamine)|GO:0004872(receptor activity)|GO:0004930(G-protein coupled receptor activity)|GO:0005515(protein binding)|GO:0005886(plasma membrane)|GO:0005887(integral to plasma membrane)|GO:0006874(cellular calcium ion homeostasis)|GO:0007165(signal transdu…	2.10122	2.44003
DSC2	desmocollin 2	GO:0005509(calcium ion binding)|GO:0005515(protein binding)|GO:0005886(plasma membrane)|GO:0007155(cell adhesion)|GO:0007156(homophilic cell adhesion)|GO:0016021(integral to membrane)|GO:0030054(cell junction)|GO:0030057(desmosome)	5.73791	4.82137
DSCR8	Down syndrome critical region gene 8	GO:0003674(molecular_function)|GO:0005575(cellular_component)|GO:0008150(biological_process)	2.18441	2.52189
DUSP13	dual specificity phosphatase 13	GO:0004725(protein tyrosine phosphatase activity)|GO:0005737(cytoplasm)|GO:0006470(protein amino acid dephosphorylation)|GO:0007126(meiosis)|GO:0007283(spermatogenesis)|GO:0008138(protein tyrosine/serine/threonine phosphatase activity)|GO:0016787(hydrolase activity)	3.05622	2.58781
DYRK1B	dual-specificity tyrosine-(Y)-phosphorylation regulated kinase 1B	GO:0000166(nucleotide binding)|GO:0003713(transcription coactivator activity)|GO:0004674(protein serine/threonine kinase activity)|GO:0004713(protein tyrosine kinase activity)|GO:0005515(protein binding)|GO:0005524(ATP binding)|GO:0005634(nucleus)|GO:0006468(protein amino acid phosphorylation)|GO:0007520(myoblast fusion)|GO:0016740(transferase activity)|GO:0045893(positive regulation of transcrip…	2.27766	2.64536
DYSF	dysferlin, limb girdle muscular dystrophy 2B (autosomal recessive)	GO:0005886(plasma membrane)|GO:0006936(muscle contraction)|GO:0016021(integral to membrane)|GO:0031410(cytoplasmic vesicle)	4.22573	3.85197
DZIP1L	DAZ interacting protein 1-like	GO:0005622(intracellular)|GO:0008270(zinc ion binding)|GO:0046872(metal ion binding)	5.40852	5.09553
E2F2	E2F transcription factor 2	GO:0003700(transcription factor activity)|GO:0003702(RNA polymerase II transcription factor activity)|GO:0005634(nucleus)|GO:0005654(nucleoplasm)|GO:0005667(transcription factor complex)|GO:0006355(regulation of transcription, DNA-dependent)|GO:0006367(transcription initiation from RNA polymerase II promoter)|GO:0006915(apoptosis)|GO:0008134(transcription factor binding)|GO:0051726(regulation of …	2.29653	2.56541
EBF1	early B-cell factor 1	GO:0003700(transcription factor activity)|GO:0005515(protein binding)|GO:0005634(nucleus)|GO:0006355(regulation of transcription, DNA-dependent)|GO:0007275(multicellular organismal development)|GO:0008270(zinc ion binding)|GO:0045941(positive regulation of transcription)|GO:0046872(metal ion binding)	0.38842	0.328238
EFCAB3	EF-hand calcium binding domain 3	GO:0005509(calcium ion binding)	2.0982	2.69237
ELANE	elastase, neutrophil expressed	GO:0004252(serine-type endopeptidase activity)|GO:0005576(extracellular region)|GO:0006508(proteolysis)|GO:0006874(cellular calcium ion homeostasis)|GO:0006909(phagocytosis)|GO:0008233(peptidase activity)|GO:0008367(bacterial binding)|GO:0009411(response to UV)|GO:0009986(cell surface)|GO:0019955(cytokine binding)|GO:0043406(positive regulation of MAP kinase activity)|GO:0045079(negative regulati…	14.0535	11.0483
ELOVL3	elongation of very long chain fatty acids (FEN1/Elo2, SUR4/Elo3, yeast)-like 3	GO:0005783(endoplasmic reticulum)|GO:0006633(fatty acid biosynthetic process)|GO:0016020(membrane)|GO:0016021(integral to membrane)	2.37153	2.00278
EMR2	egf-like module containing, mucin-like, hormone receptor-like 2	GO:0004930(G-protein coupled receptor activity)|GO:0005509(calcium ion binding)|GO:0005886(plasma membrane)|GO:0007218(neuropeptide signaling pathway)|GO:0016021(integral to membrane)	2.99418	2.54569
EMR3	egf-like module containing, mucin-like, hormone receptor-like 3	GO:0004930(G-protein coupled receptor activity)|GO:0005509(calcium ion binding)|GO:0005576(extracellular region)|GO:0005615(extracellular space)|GO:0005886(plasma membrane)|GO:0007218(neuropeptide signaling pathway)|GO:0016021(integral to membrane)	2.4844	2.2396
EPB41L1	erythrocyte membrane protein band 4.1-like 1	GO:0003779(actin binding)|GO:0005198(structural molecule activity)|GO:0005488(binding)|GO:0005737(cytoplasm)|GO:0005829(cytosol)|GO:0005856(cytoskeleton)|GO:0005886(plasma membrane)|GO:0019898(extrinsic to membrane)|GO:0030866(cortical actin cytoskeleton organization)	0.46632	0.463927
EPB42	erythrocyte membrane protein band 4.2	GO:0003810(protein-glutamine gamma-glutamyltransferase activity)|GO:0005200(structural constituent of cytoskeleton)|GO:0005515(protein binding)|GO:0005524(ATP binding)|GO:0005737(cytoplasm)|GO:0005856(cytoskeleton)|GO:0005886(plasma membrane)|GO:0008360(regulation of cell shape)|GO:0018149(peptide cross-linking)|GO:0043249(erythrocyte maturation)	2.67449	2.84658
EPHA10	EPH receptor A10	GO:0000166(nucleotide binding)|GO:0004872(receptor activity)|GO:0005003(ephrin receptor activity)|GO:0005515(protein binding)|GO:0005524(ATP binding)|GO:0005576(extracellular region)|GO:0005886(plasma membrane)|GO:0005887(integral to plasma membrane)|GO:0006468(protein amino acid phosphorylation)|GO:0007169(transmembrane receptor protein tyrosine kinase signaling pathway)|GO:0016740(transferase a…	2.08835	2.30216
EPM2A	epilepsy, progressive myoclonus type 2A, Lafora disease (laforin)	GO:0004722(protein serine/threonine phosphatase activity)|GO:0004725(protein tyrosine phosphatase activity)|GO:0005515(protein binding)|GO:0005634(nucleus)|GO:0005737(cytoplasm)|GO:0005783(endoplasmic reticulum)|GO:0005829(cytosol)|GO:0005844(polysome)|GO:0005886(plasma membrane)|GO:0005975(carbohydrate metabolic process)|GO:0005977(glycogen metabolic process)|GO:0006470(protein amino acid dephos…	2.1748	2.37355
EPSTI1	epithelial stromal interaction 1 (breast)		2.31802	2.23417
ERCC2	excision repair cross-complementing rodent repair deficiency, complementation group 2	GO:0000075(cell cycle checkpoint)|GO:0000166(nucleotide binding)|GO:0000287(magnesium ion binding)|GO:0000718(nucleotide-excision repair, DNA damage removal)|GO:0001701(in utero embryonic development)|GO:0003677(DNA binding)|GO:0004003(ATP-dependent DNA helicase activity)|GO:0004386(helicase activity)|GO:0004672(protein kinase activity)|GO:0005506(iron ion binding)|GO:0005524(ATP binding)|GO:0005…	2.24135	2.65414
ERG	v-ets erythroblastosis virus E26 oncogene homolog (avian)	GO:0003700(transcription factor activity)|GO:0004871(signal transducer activity)|GO:0005515(protein binding)|GO:0005634(nucleus)|GO:0006355(regulation of transcription, DNA-dependent)|GO:0006468(protein amino acid phosphorylation)|GO:0007165(signal transduction)|GO:0007275(multicellular organismal development)|GO:0008283(cell proliferation)|GO:0030529(ribonucleoprotein complex)|GO:0043565(sequenc…	5.33471	4.6757
ESRRB	estrogen-related receptor beta	GO:0003700(transcription factor activity)|GO:0003707(steroid hormone receptor activity)|GO:0005496(steroid binding)|GO:0005634(nucleus)|GO:0006355(regulation of transcription, DNA-dependent)|GO:0008270(zinc ion binding)|GO:0043565(sequence-specific DNA binding)|GO:0046872(metal ion binding)	2.11722	2.27956
ETS2	v-ets erythroblastosis virus E26 oncogene homolog 2 (avian)	GO:0001501(skeletal system development)|GO:0003700(transcription factor activity)|GO:0005515(protein binding)|GO:0005634(nucleus)|GO:0043565(sequence-specific DNA binding)|GO:0045893(positive regulation of transcription, DNA-dependent)	2.43568	2.03694
ETV7	ets variant 7	GO:0003700(transcription factor activity)|GO:0003704(specific RNA polymerase II transcription factor activity)|GO:0005515(protein binding)|GO:0005634(nucleus)|GO:0006355(regulation of transcription, DNA-dependent)|GO:0006366(transcription from RNA polymerase II promoter)|GO:0009887(organ morphogenesis)|GO:0043565(sequence-specific DNA binding)	2.42126	2.7948
EVX1	even-skipped homeobox 1	GO:0003700(transcription factor activity)|GO:0005634(nucleus)|GO:0006355(regulation of transcription, DNA-dependent)|GO:0007275(multicellular organismal development)|GO:0009792(embryonic development ending in birth or egg hatching)|GO:0021913(regulation of transcription from RNA polymerase II promoter involved in ventral spinal cord interneuron specification)|GO:0043565(sequence-specific DNA bind…	2.14348	2.18039
F12	coagulation factor XII (Hageman factor)	GO:0002542(Factor XII activation)|GO:0004252(serine-type endopeptidase activity)|GO:0005488(binding)|GO:0005576(extracellular region)|GO:0005615(extracellular space)|GO:0006508(proteolysis)|GO:0007597(blood coagulation, intrinsic pathway)|GO:0008233(peptidase activity)|GO:0010756(positive regulation of plasminogen activation)|GO:0016540(protein autoprocessing)|GO:0030194(positive regulation of bl…	2.08671	2.03413
F5	coagulation factor V (proaccelerin, labile factor)	GO:0005507(copper ion binding)|GO:0005509(calcium ion binding)|GO:0005576(extracellular region)|GO:0005886(plasma membrane)|GO:0007155(cell adhesion)|GO:0007596(blood coagulation)|GO:0016491(oxidoreductase activity)|GO:0031093(platelet alpha granule lumen)|GO:0055114(oxidation reduction)	3.03472	2.47606
FA2H	fatty acid 2-hydroxylase	GO:0005783(endoplasmic reticulum)|GO:0005792(microsome)|GO:0006633(fatty acid biosynthetic process)|GO:0006665(sphingolipid metabolic process)|GO:0006810(transport)|GO:0008219(cell death)|GO:0016020(membrane)|GO:0016021(integral to membrane)|GO:0016491(oxidoreductase activity)|GO:0020037(heme binding)|GO:0022900(electron transport chain)|GO:0046872(metal ion binding)	0.453453	0.40093
FABP7	fatty acid binding protein 7, brain	GO:0005215(transporter activity)|GO:0005737(cytoplasm)|GO:0006810(transport)|GO:0007399(nervous system development)|GO:0008285(negative regulation of cell proliferation)|GO:0008289(lipid binding)	3.11356	2.31947
FAM110C	family with sequence similarity 110, member C	GO:0005737(cytoplasm)|GO:0005813(centrosome)|GO:0005856(cytoskeleton)|GO:0005874(microtubule)	0.317453	0.324347
FAM115C	family with sequence similarity 115, member C		2.09183	2.09338
FAM129A	family with sequence similarity 129, member A	GO:0001933(negative regulation of protein amino acid phosphorylation)|GO:0001934(positive regulation of protein amino acid phosphorylation)|GO:0003674(molecular_function)|GO:0005737(cytoplasm)|GO:0006950(response to stress)|GO:0034976(response to endoplasmic reticulum stress)|GO:0045727(positive regulation of translation)	2.92839	2.57912
FAM150B	family with sequence similarity 150, member B	GO:0005576(extracellular region)	0.254618	0.167743
FAM167A	family with sequence similarity 167, member A		0.255767	0.278597
FAM180A	family with sequence similarity 180, member A	GO:0005576(extracellular region)	2.44562	2.42984
FAM181A	family with sequence similarity 181, member A		2.02075	2.04225
FAM182B	family with sequence similarity 182, member B		2.02089	2.09214
FAM186B	family with sequence similarity 186, member B	GO:0043234(protein complex)	3.00367	2.96928
FAM189B	family with sequence similarity 189, member B	GO:0003674(molecular_function)|GO:0008150(biological_process)|GO:0016020(membrane)|GO:0016021(integral to membrane)|GO:0050699(WW domain binding)	2.61352	2.69086
FAM194A	family with sequence similarity 194, member A		2.40573	2.31709
FAM19A1	family with sequence similarity 19 (chemokine (C-C motif)-like), member A1	GO:0005576(extracellular region)|GO:0005783(endoplasmic reticulum)	0.474995	0.401093
FAM46C	family with sequence similarity 46, member C		4.84129	5.04063
FAM74A3	family with sequence similarity 74, member A3	GO:0016020(membrane)|GO:0016021(integral to membrane)	2.63042	2.51319
FAM8A1	family with sequence similarity 8, member A1	GO:0016020(membrane)|GO:0016021(integral to membrane)	2.45252	2.15375
FAR2	fatty acyl CoA reductase 2	GO:0005488(binding)|GO:0005777(peroxisome)|GO:0005782(peroxisomal matrix)|GO:0005783(endoplasmic reticulum)|GO:0008610(lipid biosynthetic process)|GO:0016020(membrane)|GO:0016021(integral to membrane)|GO:0016491(oxidoreductase activity)|GO:0050062(long-chain-fatty-acyl-CoA reductase activity)|GO:0055114(oxidation reduction)	2.96304	2.26062
FARSB	phenylalanyl-tRNA synthetase, beta subunit	GO:0000166(nucleotide binding)|GO:0000287(magnesium ion binding)|GO:0003723(RNA binding)|GO:0004826(phenylalanine-tRNA ligase activity)|GO:0005524(ATP binding)|GO:0005625(soluble fraction)|GO:0005737(cytoplasm)|GO:0005829(cytosol)|GO:0006412(translation)|GO:0006432(phenylalanyl-tRNA aminoacylation)|GO:0016874(ligase activity)	0.494858	0.475512
FBN1	fibrillin 1	GO:0001501(skeletal system development)|GO:0001527(microfibril)|GO:0001822(kidney development)|GO:0005201(extracellular matrix structural constituent)|GO:0005509(calcium ion binding)|GO:0005515(protein binding)|GO:0005576(extracellular region)|GO:0005604(basement membrane)|GO:0005615(extracellular space)|GO:0007507(heart development)	2.32669	2.39392
FBN3	fibrillin 3	GO:0005201(extracellular matrix structural constituent)|GO:0005488(binding)|GO:0005509(calcium ion binding)|GO:0005576(extracellular region)|GO:0005578(proteinaceous extracellular matrix)	2.10078	3.08272
FBXL13	F-box and leucine-rich repeat protein 13	GO:0019941(modification-dependent protein catabolic process)	2.67815	2.65457
FBXL17	F-box and leucine-rich repeat protein 17	GO:0019941(modification-dependent protein catabolic process)	2.28342	2.65348
FBXO10	F-box protein 10	GO:0000151(ubiquitin ligase complex)|GO:0004842(ubiquitin-protein ligase activity)|GO:0016567(protein ubiquitination)|GO:0019941(modification-dependent protein catabolic process)	0.469262	0.418455
FBXO36	F-box protein 36	GO:0019941(modification-dependent protein catabolic process)	0.436359	0.470782
FCAR	Fc fragment of IgA, receptor for	GO:0004872(receptor activity)|GO:0005576(extracellular region)|GO:0005886(plasma membrane)|GO:0005887(integral to plasma membrane)|GO:0006955(immune response)|GO:0019862(IgA binding)	3.72228	4.0613
FCGR1B	Fc fragment of IgG, high affinity Ib, receptor (CD64)	GO:0004872(receptor activity)|GO:0005886(plasma membrane)|GO:0006955(immune response)|GO:0016021(integral to membrane)|GO:0019763(immunoglobulin receptor activity)|GO:0019864(IgG binding)	5.56759	4.6127
FCGR2A	Fc fragment of IgG, low affinity IIa, receptor (CD32)	GO:0004872(receptor activity)|GO:0005515(protein binding)|GO:0005886(plasma membrane)|GO:0016021(integral to membrane)|GO:0019864(IgG binding)	3.099	2.72991
FCGR3B	Fc fragment of IgG, low affinity IIIb, receptor (CD16b)	GO:0004872(receptor activity)|GO:0005576(extracellular region)|GO:0005886(plasma membrane)|GO:0006955(immune response)|GO:0019864(IgG binding)|GO:0031225(anchored to membrane)	2.48769	2.11661
FCRL2	Fc receptor-like 2	GO:0004872(receptor activity)|GO:0005070(SH3/SH2 adaptor activity)|GO:0005625(soluble fraction)|GO:0005886(plasma membrane)|GO:0007267(cell-cell signaling)|GO:0016021(integral to membrane)	0.461555	0.432412
FCRL3	Fc receptor-like 3	GO:0004872(receptor activity)|GO:0005886(plasma membrane)|GO:0016021(integral to membrane)	0.457838	0.468959
FCRLA	Fc receptor-like A	GO:0005576(extracellular region)|GO:0005737(cytoplasm)|GO:0030154(cell differentiation)	0.43256	0.356994
FECH	ferrochelatase (protoporphyria)	GO:0004325(ferrochelatase activity)|GO:0005515(protein binding)|GO:0005739(mitochondrion)|GO:0005743(mitochondrial inner membrane)|GO:0005759(mitochondrial matrix)|GO:0006091(generation of precursor metabolites and energy)|GO:0006783(heme biosynthetic process)|GO:0008198(ferrous iron binding)|GO:0009416(response to light stimulus)|GO:0016020(membrane)|GO:0046501(protoporphyrinogen IX metabolic pr…	4.98421	5.22606
FEZ1	fasciculation and elongation protein zeta 1 (zygin I)	GO:0005080(protein kinase C binding)|GO:0005737(cytoplasm)|GO:0005813(centrosome)|GO:0005886(plasma membrane)|GO:0007155(cell adhesion)|GO:0007399(nervous system development)|GO:0007411(axon guidance)|GO:0043015(gamma-tubulin binding)|GO:0047485(protein N-terminus binding)	0.459009	0.430693
FFAR2	free fatty acid receptor 2	GO:0004872(receptor activity)|GO:0004930(G-protein coupled receptor activity)|GO:0005886(plasma membrane)|GO:0005887(integral to plasma membrane)|GO:0007165(signal transduction)|GO:0007186(G-protein coupled receptor protein signaling pathway)|GO:0008289(lipid binding)	3.77651	3.75302
FFAR3	free fatty acid receptor 3	GO:0004872(receptor activity)|GO:0004930(G-protein coupled receptor activity)|GO:0005886(plasma membrane)|GO:0005887(integral to plasma membrane)|GO:0007165(signal transduction)|GO:0007186(G-protein coupled receptor protein signaling pathway)|GO:0008289(lipid binding)	2.19951	2.35103
FGF13	fibroblast growth factor 13	GO:0000165(MAPKKK cascade)|GO:0005515(protein binding)|GO:0005634(nucleus)|GO:0005737(cytoplasm)|GO:0007165(signal transduction)|GO:0007267(cell-cell signaling)|GO:0007399(nervous system development)|GO:0008083(growth factor activity)|GO:0030295(protein kinase activator activity)	4.35131	4.43135
FGF4	fibroblast growth factor 4	GO:0001502(cartilage condensation)|GO:0005576(extracellular region)|GO:0007165(signal transduction)|GO:0007267(cell-cell signaling)|GO:0008083(growth factor activity)|GO:0008201(heparin binding)|GO:0008284(positive regulation of cell proliferation)|GO:0008543(fibroblast growth factor receptor signaling pathway)|GO:0019827(stem cell maintenance)|GO:0035116(embryonic hindlimb morphogenesis)|GO:0042…	4.03801	3.24421
FGFR1	fibroblast growth factor receptor 1	GO:0000165(MAPKKK cascade)|GO:0000166(nucleotide binding)|GO:0001501(skeletal system development)|GO:0004872(receptor activity)|GO:0005007(fibroblast growth factor receptor activity)|GO:0005515(protein binding)|GO:0005524(ATP binding)|GO:0005624(membrane fraction)|GO:0005886(plasma membrane)|GO:0005887(integral to plasma membrane)|GO:0006468(protein amino acid phosphorylation)|GO:0008201(heparin …	0.364102	0.324636
FGFR4	fibroblast growth factor receptor 4	GO:0000166(nucleotide binding)|GO:0004872(receptor activity)|GO:0005007(fibroblast growth factor receptor activity)|GO:0005515(protein binding)|GO:0005524(ATP binding)|GO:0005886(plasma membrane)|GO:0005887(integral to plasma membrane)|GO:0006468(protein amino acid phosphorylation)|GO:0008284(positive regulation of cell proliferation)|GO:0008543(fibroblast growth factor receptor signaling pathway…	2.75241	2.37083
FGFRL1	fibroblast growth factor receptor-like 1	GO:0001558(regulation of cell growth)|GO:0004872(receptor activity)|GO:0005007(fibroblast growth factor receptor activity)|GO:0005515(protein binding)|GO:0005886(plasma membrane)|GO:0008285(negative regulation of cell proliferation)|GO:0016021(integral to membrane)	4.42501	4.82795
FOLR2	folate receptor 2 (fetal)	GO:0004872(receptor activity)|GO:0005542(folic acid binding)|GO:0005576(extracellular region)|GO:0005624(membrane fraction)|GO:0005886(plasma membrane)|GO:0015884(folic acid transport)|GO:0031225(anchored to membrane)	2.1706	2.1137
FOLR3	folate receptor 3 (gamma)	GO:0004872(receptor activity)|GO:0005542(folic acid binding)|GO:0005576(extracellular region)|GO:0005624(membrane fraction)|GO:0015884(folic acid transport)|GO:0019898(extrinsic to membrane)	2.59356	2.34871
FOXB1	forkhead box B1	GO:0003700(transcription factor activity)|GO:0005634(nucleus)|GO:0006355(regulation of transcription, DNA-dependent)|GO:0043565(sequence-specific DNA binding)	2.1434	2.33828
FOXC2	forkhead box C2 (MFH-1, mesenchyme forkhead 1)	GO:0001501(skeletal system development)|GO:0001503(ossification)|GO:0001568(blood vessel development)|GO:0001569(patterning of blood vessels)|GO:0001657(ureteric bud development)|GO:0001946(lymphangiogenesis)|GO:0001974(blood vessel remodeling)|GO:0003007(heart morphogenesis)|GO:0003705(RNA polymerase II transcription factor activity, enhancer binding)|GO:0005634(nucleus)|GO:0006916(anti-apoptosi…	2.38205	2.74316
FOXE3	forkhead box E3	GO:0001654(eye development)|GO:0003700(transcription factor activity)|GO:0005634(nucleus)|GO:0005667(transcription factor complex)|GO:0006355(regulation of transcription, DNA-dependent)|GO:0006366(transcription from RNA polymerase II promoter)|GO:0007275(multicellular organismal development)|GO:0043565(sequence-specific DNA binding)|GO:0048468(cell development)|GO:0050679(positive regulation of e…	2.04046	2.04836
FOXO4	forkhead box O4	GO:0000080(G1 phase of mitotic cell cycle)|GO:0003700(transcription factor activity)|GO:0005634(nucleus)|GO:0005737(cytoplasm)|GO:0005829(cytosol)|GO:0006355(regulation of transcription, DNA-dependent)|GO:0006366(transcription from RNA polymerase II promoter)|GO:0007049(cell cycle)|GO:0007050(cell cycle arrest)|GO:0007275(multicellular organismal development)|GO:0007517(muscle organ development)|…	2.12612	2.05185
FPR1	formyl peptide receptor 1	GO:0000187(activation of MAPK activity)|GO:0004872(receptor activity)|GO:0004930(G-protein coupled receptor activity)|GO:0004982(N-formyl peptide receptor activity)|GO:0005768(endosome)|GO:0005886(plasma membrane)|GO:0006928(cell motion)|GO:0006935(chemotaxis)|GO:0007165(signal transduction)|GO:0007186(G-protein coupled receptor protein signaling pathway)|GO:0007188(G-protein signaling, coupled t…	2.64381	2.4736
FPR2	formyl peptide receptor 2	GO:0004872(receptor activity)|GO:0004930(G-protein coupled receptor activity)|GO:0004982(N-formyl peptide receptor activity)|GO:0005886(plasma membrane)|GO:0006928(cell motion)|GO:0006935(chemotaxis)|GO:0006954(inflammatory response)|GO:0007155(cell adhesion)|GO:0007165(signal transduction)|GO:0007186(G-protein coupled receptor protein signaling pathway)|GO:0016021(integral to membrane)	3.7291	3.33296
FRAT2	frequently rearranged in advanced T-cell lymphomas 2	GO:0003674(molecular_function)|GO:0005575(cellular_component)|GO:0007275(multicellular organismal development)|GO:0008283(cell proliferation)|GO:0016055(Wnt receptor signaling pathway)	2.43393	2.24397
FRMD3	FERM domain containing 3	GO:0005488(binding)|GO:0005737(cytoplasm)|GO:0005856(cytoskeleton)|GO:0008092(cytoskeletal protein binding)|GO:0016020(membrane)|GO:0016021(integral to membrane)|GO:0019898(extrinsic to membrane)	2.53927	2.07126
FUZ	fuzzy homolog (Drosophila)	GO:0005737(cytoplasm)|GO:0005856(cytoskeleton)	2.83453	2.69457
FZD3	frizzled homolog 3 (Drosophila)	GO:0001736(establishment of planar polarity)|GO:0001843(neural tube closure)|GO:0004926(non-G-protein coupled 7TM receptor activity)|GO:0004930(G-protein coupled receptor activity)|GO:0005515(protein binding)|GO:0005887(integral to plasma membrane)|GO:0007186(G-protein coupled receptor protein signaling pathway)|GO:0007275(multicellular organismal development)|GO:0008283(cell proliferation)|GO:00…	0.494028	0.443344
G0S2	G0/G1switch 2	GO:0003674(molecular_function)|GO:0005575(cellular_component)|GO:0007049(cell cycle)	4.03741	3.79471
G6PC2	glucose-6-phosphatase, catalytic, 2	GO:0004346(glucose-6-phosphatase activity)|GO:0005783(endoplasmic reticulum)|GO:0006094(gluconeogenesis)|GO:0016020(membrane)|GO:0016021(integral to membrane)|GO:0016787(hydrolase activity)	2.1394	2.14535
GADD45G	growth arrest and DNA-damage-inducible, gamma	GO:0000185(activation of MAPKKK activity)|GO:0000186(activation of MAPKK activity)|GO:0005515(protein binding)|GO:0006281(DNA repair)|GO:0006469(negative regulation of protein kinase activity)|GO:0006915(apoptosis)|GO:0006950(response to stress)|GO:0007275(multicellular organismal development)|GO:0030154(cell differentiation)|GO:0051726(regulation of cell cycle)	2.19231	2.29603
GALNT14	UDP-N-acetyl-alpha-D-galactosamine:polypeptide N-acetylgalactosaminyltransferase 14 (GalNAc-T14)	GO:0004653(polypeptide N-acetylgalactosaminyltransferase activity)|GO:0005509(calcium ion binding)|GO:0005529(sugar binding)|GO:0005794(Golgi apparatus)|GO:0016020(membrane)|GO:0016021(integral to membrane)|GO:0016757(transferase activity, transferring glycosyl groups)|GO:0030145(manganese ion binding)	7.74668	7.01039
GARNL3	GTPase activating Rap/RanGAP domain-like 3	GO:0005083(small GTPase regulator activity)|GO:0005096(GTPase activator activity)|GO:0005622(intracellular)|GO:0051056(regulation of small GTPase mediated signal transduction)	2.20019	2.20626
GCA	grancalcin, EF-hand calcium binding protein	GO:0005509(calcium ion binding)|GO:0005737(cytoplasm)|GO:0005886(plasma membrane)|GO:0006944(membrane fusion)|GO:0042803(protein homodimerization activity)	2.88322	2.98802
GDEP	gene differentially expressed in prostate		2.11346	2.39937
GFRA2	GDNF family receptor alpha 2	GO:0004872(receptor activity)|GO:0005886(plasma membrane)|GO:0007169(transmembrane receptor protein tyrosine kinase signaling pathway)|GO:0016167(glial cell line-derived neurotrophic factor receptor activity)|GO:0019898(extrinsic to membrane)|GO:0031225(anchored to membrane)	2.42363	2.46541
GH2	growth hormone 2	GO:0005179(hormone activity)|GO:0005576(extracellular region)	2.34086	2.72978
GHRHR	growth hormone releasing hormone receptor	GO:0005624(membrane fraction)|GO:0005637(nuclear inner membrane)|GO:0005640(nuclear outer membrane)|GO:0005737(cytoplasm)|GO:0005886(plasma membrane)|GO:0007186(G-protein coupled receptor protein signaling pathway)|GO:0007189(activation of adenylate cyclase activity by G-protein signaling pathway)|GO:0007595(lactation)|GO:0008284(positive regulation of cell proliferation)|GO:0008340(determination…	2.09374	2.89396
GIGYF1	GRB10 interacting GYF protein 1	GO:0005515(protein binding)|GO:0048009(insulin-like growth factor receptor signaling pathway)	2.63509	3.32497
GK	glycerol kinase	GO:0000166(nucleotide binding)|GO:0004370(glycerol kinase activity)|GO:0005524(ATP binding)|GO:0005737(cytoplasm)|GO:0005739(mitochondrion)|GO:0005741(mitochondrial outer membrane)|GO:0005829(cytosol)|GO:0005975(carbohydrate metabolic process)|GO:0006072(glycerol-3-phosphate metabolic process)|GO:0016020(membrane)|GO:0016740(transferase activity)	3.94022	3.25128
GLI1	GLI family zinc finger 1	GO:0001649(osteoblast differentiation)|GO:0003677(DNA binding)|GO:0003682(chromatin binding)|GO:0003705(RNA polymerase II transcription factor activity, enhancer binding)|GO:0005515(protein binding)|GO:0005622(intracellular)|GO:0005634(nucleus)|GO:0005737(cytoplasm)|GO:0005929(cilium)|GO:0007275(multicellular organismal development)|GO:0007283(spermatogenesis)|GO:0007418(ventral midline developme…	0.456785	0.432052
GLIS2	GLIS family zinc finger 2	GO:0003677(DNA binding)|GO:0005622(intracellular)|GO:0005634(nucleus)|GO:0005737(cytoplasm)|GO:0007275(multicellular organismal development)|GO:0007399(nervous system development)|GO:0008270(zinc ion binding)|GO:0016481(negative regulation of transcription)|GO:0016563(transcription activator activity)|GO:0016607(nuclear speck)|GO:0030154(cell differentiation)|GO:0045941(positive regulation of tra…	2.39045	2.49276
GLOD5	glyoxalase domain containing 5		2.86236	2.54001
GLRX5	glutaredoxin 5	GO:0005739(mitochondrion)|GO:0009055(electron carrier activity)|GO:0015035(protein disulfide oxidoreductase activity)|GO:0045454(cell redox homeostasis)	2.06366	2.22131
GLT1D1	glycosyltransferase 1 domain containing 1	GO:0005576(extracellular region)|GO:0009058(biosynthetic process)|GO:0016757(transferase activity, transferring glycosyl groups)	3.11435	2.70958
GLTPD1	glycolipid transfer protein domain containing 1	GO:0005737(cytoplasm)|GO:0017089(glycolipid transporter activity)|GO:0046836(glycolipid transport)|GO:0051861(glycolipid binding)	2.36754	2.88103
GLTPD2	glycolipid transfer protein domain containing 2	GO:0005737(cytoplasm)|GO:0017089(glycolipid transporter activity)|GO:0046836(glycolipid transport)|GO:0051861(glycolipid binding)	2.57322	2.80252
GMPR	guanosine monophosphate reductase	GO:0003920(GMP reductase activity)|GO:0009117(nucleotide metabolic process)|GO:0009409(response to cold)|GO:0016491(oxidoreductase activity)|GO:0030955(potassium ion binding)|GO:0046872(metal ion binding)|GO:0055114(oxidation reduction)	2.44726	2.59645
GNG10	guanine nucleotide binding protein (G protein), gamma 10	GO:0003924(GTPase activity)|GO:0004871(signal transducer activity)|GO:0005834(heterotrimeric G-protein complex)|GO:0005886(plasma membrane)|GO:0007165(signal transduction)|GO:0007186(G-protein coupled receptor protein signaling pathway)|GO:0009755(hormone-mediated signaling pathway)	2.36323	2.88514
GPM6B	glycoprotein M6B	GO:0003674(molecular_function)|GO:0007275(multicellular organismal development)|GO:0007399(nervous system development)|GO:0016020(membrane)|GO:0016021(integral to membrane)|GO:0030154(cell differentiation)	0.499754	0.465692
GPR1	G protein-coupled receptor 1	GO:0004872(receptor activity)|GO:0004930(G-protein coupled receptor activity)|GO:0005737(cytoplasm)|GO:0005886(plasma membrane)|GO:0005887(integral to plasma membrane)|GO:0007165(signal transduction)|GO:0007186(G-protein coupled receptor protein signaling pathway)	2.03351	2.19116
GPR109A	G protein-coupled receptor 109A	GO:0004872(receptor activity)|GO:0005525(GTP binding)|GO:0005886(plasma membrane)|GO:0006915(apoptosis)|GO:0007165(signal transduction)|GO:0007186(G-protein coupled receptor protein signaling pathway)|GO:0016021(integral to membrane)|GO:0033031(positive regulation of neutrophil apoptosis)|GO:0045028(purinergic nucleotide receptor activity, G-protein coupled)|GO:0050995(negative regulation of lipi…	2.82821	2.66853
GPR109B	G protein-coupled receptor 109B	GO:0004872(receptor activity)|GO:0005525(GTP binding)|GO:0005886(plasma membrane)|GO:0005887(integral to plasma membrane)|GO:0007165(signal transduction)|GO:0007186(G-protein coupled receptor protein signaling pathway)|GO:0045028(purinergic nucleotide receptor activity, G-protein coupled)|GO:0050995(negative regulation of lipid catabolic process)|GO:0070165(positive regulation of adiponectin secr…	3.87574	3.6779
GPR132	G protein-coupled receptor 132	GO:0000082(G1/S transition of mitotic cell cycle)|GO:0004872(receptor activity)|GO:0004930(G-protein coupled receptor activity)|GO:0005886(plasma membrane)|GO:0006950(response to stress)|GO:0007165(signal transduction)|GO:0007186(G-protein coupled receptor protein signaling pathway)|GO:0016021(integral to membrane)	2.05645	2.26599
GPR141	G protein-coupled receptor 141	GO:0004872(receptor activity)|GO:0004930(G-protein coupled receptor activity)|GO:0005886(plasma membrane)|GO:0007165(signal transduction)|GO:0007186(G-protein coupled receptor protein signaling pathway)|GO:0016021(integral to membrane)	2.81069	2.36411
GPR150	G protein-coupled receptor 150	GO:0004872(receptor activity)|GO:0004930(G-protein coupled receptor activity)|GO:0005886(plasma membrane)|GO:0007165(signal transduction)|GO:0007186(G-protein coupled receptor protein signaling pathway)|GO:0016021(integral to membrane)	2.68203	2.95096
GPR25	G protein-coupled receptor 25	GO:0004872(receptor activity)|GO:0004930(G-protein coupled receptor activity)|GO:0005886(plasma membrane)|GO:0005887(integral to plasma membrane)|GO:0007165(signal transduction)|GO:0007186(G-protein coupled receptor protein signaling pathway)	2.37398	2.4182
GPR27	G protein-coupled receptor 27	GO:0004872(receptor activity)|GO:0004930(G-protein coupled receptor activity)|GO:0005886(plasma membrane)|GO:0007165(signal transduction)|GO:0007186(G-protein coupled receptor protein signaling pathway)|GO:0016021(integral to membrane)	2.79363	3.09496
GPR64	G protein-coupled receptor 64	GO:0004930(G-protein coupled receptor activity)|GO:0005886(plasma membrane)|GO:0005887(integral to plasma membrane)|GO:0007218(neuropeptide signaling pathway)|GO:0007283(spermatogenesis)|GO:0016324(apical plasma membrane)	2.614	2.18915
GPR68	G protein-coupled receptor 68	GO:0004872(receptor activity)|GO:0004930(G-protein coupled receptor activity)|GO:0005886(plasma membrane)|GO:0005887(integral to plasma membrane)|GO:0006954(inflammatory response)|GO:0007165(signal transduction)|GO:0007186(G-protein coupled receptor protein signaling pathway)	0.488406	0.496725
GPR77	G protein-coupled receptor 77	GO:0004872(receptor activity)|GO:0004930(G-protein coupled receptor activity)|GO:0004944(C5a anaphylatoxin receptor activity)|GO:0005575(cellular_component)|GO:0005886(plasma membrane)|GO:0006935(chemotaxis)|GO:0007165(signal transduction)|GO:0007186(G-protein coupled receptor protein signaling pathway)|GO:0008150(biological_process)|GO:0016021(integral to membrane)	2.4321	2.38552
GPR84	G protein-coupled receptor 84	GO:0004872(receptor activity)|GO:0004930(G-protein coupled receptor activity)|GO:0005886(plasma membrane)|GO:0007165(signal transduction)|GO:0007186(G-protein coupled receptor protein signaling pathway)|GO:0008150(biological_process)|GO:0016021(integral to membrane)	5.71189	4.64596
GPR97	G protein-coupled receptor 97	GO:0004930(G-protein coupled receptor activity)|GO:0005886(plasma membrane)|GO:0007218(neuropeptide signaling pathway)|GO:0016021(integral to membrane)	3.72099	3.66123
GPX5	glutathione peroxidase 5 (epididymal androgen-related protein)	GO:0004602(glutathione peroxidase activity)|GO:0005576(extracellular region)|GO:0006629(lipid metabolic process)|GO:0006979(response to oxidative stress)|GO:0016491(oxidoreductase activity)|GO:0055114(oxidation reduction)	2.47946	2.63596
GRB10	growth factor receptor-bound protein 10	GO:0005070(SH3/SH2 adaptor activity)|GO:0005158(insulin receptor binding)|GO:0005515(protein binding)|GO:0005737(cytoplasm)|GO:0005886(plasma membrane)|GO:0007165(signal transduction)|GO:0007267(cell-cell signaling)|GO:0046325(negative regulation of glucose import)|GO:0046627(negative regulation of insulin receptor signaling pathway)|GO:0048009(insulin-like growth factor receptor signaling pathwa…	2.82013	2.43818
GRIN1	glutamate receptor, ionotropic, N-methyl D-aspartate 1	GO:0000287(magnesium ion binding)|GO:0004872(receptor activity)|GO:0004972(N-methyl-D-aspartate selective glutamate receptor activity)|GO:0005216(ion channel activity)|GO:0005234(extracellular-glutamate-gated ion channel activity)|GO:0005262(calcium channel activity)|GO:0005509(calcium ion binding)|GO:0005516(calmodulin binding)|GO:0005886(plasma membrane)|GO:0005887(integral to plasma membrane)|…	2.52108	2.99639
GRINA	glutamate receptor, ionotropic, N-methyl D-aspartate-associated protein 1 (glutamate binding)	GO:0016020(membrane)|GO:0016021(integral to membrane)	2.48805	2.41079
GRIP1	glutamate receptor interacting protein 1	GO:0003713(transcription coactivator activity)|GO:0005515(protein binding)|GO:0005783(endoplasmic reticulum)|GO:0005829(cytosol)|GO:0005886(plasma membrane)|GO:0007242(intracellular signaling cascade)|GO:0008104(protein localization)|GO:0016023(cytoplasmic membrane-bounded vesicle)|GO:0030054(cell junction)|GO:0030159(receptor signaling complex scaffold activity)|GO:0030521(androgen receptor sign…	0.475109	0.377776
GRM4	glutamate receptor, metabotropic 4	GO:0000187(activation of MAPK activity)|GO:0004872(receptor activity)|GO:0004930(G-protein coupled receptor activity)|GO:0005622(intracellular)|GO:0005886(plasma membrane)|GO:0005887(integral to plasma membrane)|GO:0007165(signal transduction)|GO:0007186(G-protein coupled receptor protein signaling pathway)|GO:0007194(negative regulation of adenylate cyclase activity)|GO:0007196(inhibition of ade…	2.53179	2.19652
GRPR	gastrin-releasing peptide receptor	GO:0004872(receptor activity)|GO:0004946(bombesin receptor activity)|GO:0005886(plasma membrane)|GO:0005887(integral to plasma membrane)|GO:0007165(signal transduction)|GO:0007186(G-protein coupled receptor protein signaling pathway)|GO:0007611(learning or memory)|GO:0008528(peptide receptor activity, G-protein coupled)|GO:0035176(social behavior)|GO:0042127(regulation of cell proliferation)|GO:0…	2.59174	2.78286
GUSBP3	glucuronidase, beta pseudogene 3	GO:0004553(hydrolase activity, hydrolyzing O-glycosyl compounds)|GO:0005975(carbohydrate metabolic process)	0.488072	0.416498
GYPA	glycophorin A (MNS blood group)	GO:0005624(membrane fraction)|GO:0005886(plasma membrane)|GO:0016021(integral to membrane)|GO:0042802(identical protein binding)	5.76545	5.83622
GYPB	glycophorin B (MNS blood group)	GO:0005886(plasma membrane)|GO:0005887(integral to plasma membrane)	8.56012	8.83723
H6PD	hexose-6-phosphate dehydrogenase (glucose 1-dehydrogenase)	GO:0004345(glucose-6-phosphate dehydrogenase activity)|GO:0005488(binding)|GO:0005783(endoplasmic reticulum)|GO:0005788(endoplasmic reticulum lumen)|GO:0005792(microsome)|GO:0005975(carbohydrate metabolic process)|GO:0006006(glucose metabolic process)|GO:0006098(pentose-phosphate shunt)|GO:0016491(oxidoreductase activity)|GO:0016787(hydrolase activity)|GO:0017057(6-phosphogluconolactonase activit…	2.15994	2.88698
HAPLN4	hyaluronan and proteoglycan link protein 4	GO:0005488(binding)|GO:0005540(hyaluronic acid binding)|GO:0005576(extracellular region)|GO:0005578(proteinaceous extracellular matrix)|GO:0007155(cell adhesion)	2.48189	2.2204
HBD	hemoglobin, delta	GO:0005344(oxygen transporter activity)|GO:0005833(hemoglobin complex)|GO:0006810(transport)|GO:0015671(oxygen transport)|GO:0019825(oxygen binding)|GO:0020037(heme binding)|GO:0046872(metal ion binding)	5.89512	5.70503
HBZ	hemoglobin, zeta	GO:0000122(negative regulation of transcription from RNA polymerase II promoter)|GO:0005344(oxygen transporter activity)|GO:0005833(hemoglobin complex)|GO:0006810(transport)|GO:0015671(oxygen transport)|GO:0019825(oxygen binding)|GO:0020037(heme binding)|GO:0043249(erythrocyte maturation)|GO:0046872(metal ion binding)	3.0088	3.33883
HCK	hemopoietic cell kinase	GO:0000166(nucleotide binding)|GO:0004715(non-membrane spanning protein tyrosine kinase activity)|GO:0005515(protein binding)|GO:0005524(ATP binding)|GO:0005737(cytoplasm)|GO:0006468(protein amino acid phosphorylation)|GO:0006909(phagocytosis)|GO:0007498(mesoderm development)|GO:0016020(membrane)|GO:0016740(transferase activity)|GO:0031225(anchored to membrane)|GO:0044419(interspecies interaction…	2.78508	2.38674
HEATR7A	HEAT repeat containing 7A	GO:0005488(binding)	2.34429	2.10401
HEPACAM2	HEPACAM family member 2	GO:0016020(membrane)|GO:0016021(integral to membrane)	2.4419	2.47003
HES4	hairy and enhancer of split 4 (Drosophila)	GO:0003677(DNA binding)|GO:0005634(nucleus)|GO:0006355(regulation of transcription, DNA-dependent)|GO:0007275(multicellular organismal development)|GO:0007399(nervous system development)|GO:0030154(cell differentiation)|GO:0030528(transcription regulator activity)	2.05206	2.40307
HK2	hexokinase 2	GO:0000166(nucleotide binding)|GO:0004396(hexokinase activity)|GO:0005524(ATP binding)|GO:0005536(glucose binding)|GO:0005739(mitochondrion)|GO:0005741(mitochondrial outer membrane)|GO:0005829(cytosol)|GO:0005975(carbohydrate metabolic process)|GO:0006006(glucose metabolic process)|GO:0006096(glycolysis)|GO:0007595(lactation)|GO:0016020(membrane)|GO:0016301(kinase activity)|GO:0016740(transferase…	2.71182	2.12781
HK3	hexokinase 3 (white cell)	GO:0000166(nucleotide binding)|GO:0004396(hexokinase activity)|GO:0005524(ATP binding)|GO:0005829(cytosol)|GO:0005975(carbohydrate metabolic process)|GO:0006096(glycolysis)|GO:0016020(membrane)|GO:0016301(kinase activity)|GO:0016740(transferase activity)|GO:0019899(enzyme binding)|GO:0042562(hormone binding)|GO:0043234(protein complex)	2.22767	2.22398
HLA-DOA	major histocompatibility complex, class II, DO alpha	GO:0002504(antigen processing and presentation of peptide or polysaccharide antigen via MHC class II)|GO:0005886(plasma membrane)|GO:0006955(immune response)|GO:0016021(integral to membrane)|GO:0019886(antigen processing and presentation of exogenous peptide antigen via MHC class II)|GO:0032395(MHC class II receptor activity)|GO:0042613(MHC class II protein complex)|GO:0045580(regulation of T cel…	0.471248	0.48426
HLA-DQA2	major histocompatibility complex, class II, DQ alpha 2	GO:0002504(antigen processing and presentation of peptide or polysaccharide antigen via MHC class II)|GO:0005886(plasma membrane)|GO:0005887(integral to plasma membrane)|GO:0006955(immune response)|GO:0032395(MHC class II receptor activity)|GO:0042613(MHC class II protein complex)	0.078935	0.115264
HLA-DQB1	major histocompatibility complex, class II, DQ beta 1	GO:0002504(antigen processing and presentation of peptide or polysaccharide antigen via MHC class II)|GO:0005886(plasma membrane)|GO:0006955(immune response)|GO:0016020(membrane)|GO:0016021(integral to membrane)|GO:0032395(MHC class II receptor activity)|GO:0042613(MHC class II protein complex)	0.396494	0.400959
HLX	H2.0-like homeobox	GO:0001889(liver development)|GO:0003700(transcription factor activity)|GO:0005634(nucleus)|GO:0005730(nucleolus)|GO:0005737(cytoplasm)|GO:0006355(regulation of transcription, DNA-dependent)|GO:0007275(multicellular organismal development)|GO:0007519(skeletal muscle tissue development)|GO:0008284(positive regulation of cell proliferation)|GO:0030154(cell differentiation)|GO:0043565(sequence-speci…	2.40077	2.38175
HMX2	H6 family homeobox 2	GO:0003700(transcription factor activity)|GO:0005634(nucleus)|GO:0006355(regulation of transcription, DNA-dependent)|GO:0007275(multicellular organismal development)|GO:0007399(nervous system development)|GO:0007420(brain development)|GO:0008284(positive regulation of cell proliferation)|GO:0030154(cell differentiation)|GO:0042472(inner ear morphogenesis)|GO:0043565(sequence-specific DNA binding)	2.92863	3.09165
HNF1A	HNF1 homeobox A	GO:0001750(photoreceptor outer segment)|GO:0001824(blastocyst development)|GO:0001889(liver development)|GO:0001890(placenta development)|GO:0003690(double-stranded DNA binding)|GO:0003700(transcription factor activity)|GO:0003704(specific RNA polymerase II transcription factor activity)|GO:0005515(protein binding)|GO:0005667(transcription factor complex)|GO:0005737(cytoplasm)|GO:0006338(chromati…	2.29138	2.34769
HOMER1	homer homolog 1 (Drosophila)	GO:0003009(skeletal muscle contraction)|GO:0005515(protein binding)|GO:0005624(membrane fraction)|GO:0005737(cytoplasm)|GO:0005886(plasma membrane)|GO:0005887(integral to plasma membrane)|GO:0007206(activation of phospholipase C activity by metabotropic glutamate receptor signaling pathway)|GO:0007268(synaptic transmission)|GO:0014069(postsynaptic density)|GO:0030018(Z disc)|GO:0030054(cell junct…	0.490087	0.497644
HORMAD1	HORMA domain containing 1	GO:0005634(nucleus)|GO:0007067(mitosis)	2.5751	2.52366
HP	haptoglobin	GO:0003824(catalytic activity)|GO:0004252(serine-type endopeptidase activity)|GO:0005576(extracellular region)|GO:0006508(proteolysis)|GO:0006879(cellular iron ion homeostasis)|GO:0006952(defense response)|GO:0030492(hemoglobin binding)	12.7687	11.7338
HPCAL4	hippocalcin like 4	GO:0005246(calcium channel regulator activity)|GO:0005509(calcium ion binding)|GO:0005622(intracellular)|GO:0007417(central nervous system development)|GO:0008022(protein C-terminus binding)|GO:0019904(protein domain specific binding)	0.490043	0.478644
HPR	haptoglobin-related protein	GO:0003824(catalytic activity)|GO:0004252(serine-type endopeptidase activity)|GO:0005576(extracellular region)|GO:0006508(proteolysis)|GO:0030492(hemoglobin binding)|GO:0034366(spherical high-density lipoprotein particle)	21.1416	16.6092
HPSE	heparanase	GO:0000287(magnesium ion binding)|GO:0004566(beta-glucuronidase activity)|GO:0005509(calcium ion binding)|GO:0005576(extracellular region)|GO:0005764(lysosome)|GO:0006029(proteoglycan metabolic process)|GO:0016020(membrane)|GO:0016798(hydrolase activity, acting on glycosyl bonds)|GO:0019898(extrinsic to membrane)	2.66518	2.08326
HRH3	histamine receptor H3	GO:0004872(receptor activity)|GO:0004930(G-protein coupled receptor activity)|GO:0004969(histamine receptor activity)|GO:0005886(plasma membrane)|GO:0005887(integral to plasma membrane)|GO:0007165(signal transduction)|GO:0007187(G-protein signaling, coupled to cyclic nucleotide second messenger)|GO:0007194(negative regulation of adenylate cyclase activity)|GO:0007204(elevation of cytosolic calciu…	2.00299	2.25184
HS3ST1	heparan sulfate (glucosamine) 3-O-sulfotransferase 1	GO:0005794(Golgi apparatus)|GO:0005796(Golgi lumen)|GO:0008146(sulfotransferase activity)|GO:0008467([heparan sulfate]-glucosamine 3-sulfotransferase 1 activity)|GO:0016021(integral to membrane)|GO:0016740(transferase activity)	0.462818	0.428809
HSD17B3	hydroxysteroid (17-beta) dehydrogenase 3	GO:0004303(estradiol 17-beta-dehydrogenase activity)|GO:0005488(binding)|GO:0005792(microsome)|GO:0006694(steroid biosynthetic process)|GO:0016491(oxidoreductase activity)|GO:0030539(male genitalia development)|GO:0047045(testosterone 17-beta-dehydrogenase (NADP+) activity)|GO:0055114(oxidation reduction)	0.477382	0.380998
HSPA1A	heat shock 70kDa protein 1A		2.2041	2.024
HSPA6	heat shock 70kDa protein 6 (HSP70B')	GO:0000166(nucleotide binding)|GO:0005524(ATP binding)|GO:0006986(response to unfolded protein)	2.46543	2.29774
HTR1B	5-hydroxytryptamine (serotonin) receptor 1B	GO:0004872(receptor activity)|GO:0004930(G-protein coupled receptor activity)|GO:0004993(serotonin receptor activity)|GO:0005515(protein binding)|GO:0005886(plasma membrane)|GO:0005887(integral to plasma membrane)|GO:0007165(signal transduction)|GO:0007187(G-protein signaling, coupled to cyclic nucleotide second messenger)|GO:0007268(synaptic transmission)|GO:0008144(drug binding)|GO:0009636(resp…	2.09104	2.20761
HTRA3	HtrA serine peptidase 3	GO:0001558(regulation of cell growth)|GO:0004252(serine-type endopeptidase activity)|GO:0005515(protein binding)|GO:0005520(insulin-like growth factor binding)|GO:0005576(extracellular region)|GO:0006508(proteolysis)|GO:0008233(peptidase activity)	6.08945	4.65343
IER3	immediate early response 3	GO:0005515(protein binding)|GO:0006915(apoptosis)|GO:0006916(anti-apoptosis)|GO:0009653(anatomical structure morphogenesis)|GO:0016020(membrane)|GO:0016021(integral to membrane)	2.06803	2.18965
IFI27	interferon, alpha-inducible protein 27	GO:0003674(molecular_function)|GO:0008150(biological_process)|GO:0016020(membrane)|GO:0016021(integral to membrane)	4.91954	7.19936
IFI6	interferon, alpha-inducible protein 6	GO:0001836(release of cytochrome c from mitochondria)|GO:0005515(protein binding)|GO:0005739(mitochondrion)|GO:0006916(anti-apoptosis)|GO:0006955(immune response)|GO:0016020(membrane)|GO:0016021(integral to membrane)|GO:0043154(negative regulation of caspase activity)|GO:0051902(negative regulation of mitochondrial depolarization)	2.12889	2.13179
IFIT1	interferon-induced protein with tetratricopeptide repeats 1	GO:0005488(binding)|GO:0005737(cytoplasm)|GO:0008150(biological_process)	3.00756	3.19778
IFIT2	interferon-induced protein with tetratricopeptide repeats 2	GO:0005488(binding)|GO:0005575(cellular_component)|GO:0008150(biological_process)	2.69296	3.40049
IFIT3	interferon-induced protein with tetratricopeptide repeats 3	GO:0005488(binding)|GO:0005575(cellular_component)|GO:0008150(biological_process)	3.06949	3.07039
IFITM5	interferon induced transmembrane protein 5	GO:0009607(response to biotic stimulus)|GO:0016020(membrane)|GO:0016021(integral to membrane)	2.38338	2.40849
IGSF6	immunoglobulin superfamily, member 6	GO:0004888(transmembrane receptor activity)|GO:0005887(integral to plasma membrane)|GO:0006955(immune response)|GO:0007166(cell surface receptor linked signal transduction)|GO:0016020(membrane)	2.61111	2.24016
IKZF2	IKAROS family zinc finger 2 (Helios)	GO:0003674(molecular_function)|GO:0003677(DNA binding)|GO:0005622(intracellular)|GO:0005634(nucleus)|GO:0008150(biological_process)|GO:0008270(zinc ion binding)|GO:0010552(positive regulation of gene-specific transcription from RNA polymerase II promoter)|GO:0016563(transcription activator activity)|GO:0042803(protein homodimerization activity)|GO:0045449(regulation of transcription)|GO:0046872(m…	0.465261	0.467421
IL12RB1	interleukin 12 receptor, beta 1	GO:0004896(cytokine receptor activity)|GO:0005887(integral to plasma membrane)|GO:0007166(cell surface receptor linked signal transduction)|GO:0008284(positive regulation of cell proliferation)|GO:0009897(external side of plasma membrane)|GO:0016020(membrane)|GO:0018108(peptidyl-tyrosine phosphorylation)	2.10761	2.38795
IL13RA1	interleukin 13 receptor, alpha 1	GO:0002639(positive regulation of immunoglobulin production)|GO:0004872(receptor activity)|GO:0005515(protein binding)|GO:0005886(plasma membrane)|GO:0005898(interleukin-13 receptor complex)|GO:0007166(cell surface receptor linked signal transduction)|GO:0016021(integral to membrane)|GO:0016515(interleukin-13 receptor activity)|GO:0030890(positive regulation of B cell proliferation)	2.55165	2.64881
IL1B	interleukin 1, beta	GO:0000187(activation of MAPK activity)|GO:0001660(fever)|GO:0001934(positive regulation of protein amino acid phosphorylation)|GO:0002439(chronic inflammatory response to antigenic stimulus)|GO:0002711(positive regulation of T cell mediated immunity)|GO:0005125(cytokine activity)|GO:0005149(interleukin-1 receptor binding)|GO:0005576(extracellular region)|GO:0005615(extracellular space)|GO:000691…	3.11276	2.78095
IL1R1	interleukin 1 receptor, type I	GO:0004888(transmembrane receptor activity)|GO:0004909(interleukin-1, Type I, activating receptor activity)|GO:0005161(platelet-derived growth factor receptor binding)|GO:0005515(protein binding)|GO:0005887(integral to plasma membrane)|GO:0016020(membrane)|GO:0045087(innate immune response)|GO:0070498(interleukin-1-mediated signaling pathway)|GO:0070555(response to interleukin-1)	2.44883	2.4219
IL1R2	interleukin 1 receptor, type II	GO:0004872(receptor activity)|GO:0004910(interleukin-1, Type II, blocking receptor activity)|GO:0006955(immune response)|GO:0016020(membrane)|GO:0016021(integral to membrane)	2.83669	3.41691
IL1RAP	interleukin 1 receptor accessory protein	GO:0004888(transmembrane receptor activity)|GO:0004908(interleukin-1 receptor activity)|GO:0005515(protein binding)|GO:0005576(extracellular region)|GO:0005886(plasma membrane)|GO:0005887(integral to plasma membrane)|GO:0006461(protein complex assembly)|GO:0006954(inflammatory response)|GO:0007165(signal transduction)|GO:0045087(innate immune response)	2.31131	2.40888
IL1RN	interleukin 1 receptor antagonist	GO:0005125(cytokine activity)|GO:0005152(interleukin-1 receptor antagonist activity)|GO:0005515(protein binding)|GO:0005576(extracellular region)|GO:0005615(extracellular space)|GO:0005622(intracellular)|GO:0005737(cytoplasm)|GO:0006954(inflammatory response)|GO:0006955(immune response)|GO:0051384(response to glucocorticoid stimulus)	3.45989	2.72185
IL28A	interleukin 28A (interferon, lambda 2)	GO:0005125(cytokine activity)|GO:0005576(extracellular region)|GO:0005615(extracellular space)|GO:0009615(response to virus)	2.457	2.26499
IL28RA	interleukin 28 receptor, alpha (interferon, lambda receptor)	GO:0004872(receptor activity)|GO:0004896(cytokine receptor activity)|GO:0005515(protein binding)|GO:0008285(negative regulation of cell proliferation)|GO:0016020(membrane)|GO:0016021(integral to membrane)|GO:0032002(interleukin-28 receptor complex)|GO:0050691(regulation of defense response to virus by host)	0.499667	0.487233
IL34	interleukin 34	GO:0001934(positive regulation of protein amino acid phosphorylation)|GO:0005125(cytokine activity)|GO:0005157(macrophage colony stimulating factor receptor binding)|GO:0005576(extracellular region)|GO:0005615(extracellular space)|GO:0008083(growth factor activity)|GO:0008284(positive regulation of cell proliferation)	2.09048	2.4741
IL8RA	interleukin 8 receptor, alpha	GO:0004872(receptor activity)|GO:0004918(interleukin-8 receptor activity)|GO:0004930(G-protein coupled receptor activity)|GO:0004950(chemokine receptor activity)|GO:0005886(plasma membrane)|GO:0006935(chemotaxis)|GO:0006954(inflammatory response)|GO:0007186(G-protein coupled receptor protein signaling pathway)|GO:0016021(integral to membrane)	3.1293	2.80501
IL8RB	interleukin 8 receptor, beta	GO:0004872(receptor activity)|GO:0004918(interleukin-8 receptor activity)|GO:0004930(G-protein coupled receptor activity)|GO:0005515(protein binding)|GO:0005622(intracellular)|GO:0005886(plasma membrane)|GO:0005887(integral to plasma membrane)|GO:0006915(apoptosis)|GO:0006935(chemotaxis)|GO:0006954(inflammatory response)|GO:0006968(cellular defense response)|GO:0007200(activation of phospholipase…	2.47759	2.85698
IL8RBP	interleukin 8 receptor, beta pseudogene		2.74842	2.81068
IMPA2	inositol(myo)-1(or 4)-monophosphatase 2	GO:0000287(magnesium ion binding)|GO:0006796(phosphate metabolic process)|GO:0007165(signal transduction)|GO:0008934(inositol-1(or 4)-monophosphatase activity)|GO:0016787(hydrolase activity)	2.10421	2.05213
INA	internexin neuronal intermediate filament protein, alpha	GO:0005200(structural constituent of cytoskeleton)|GO:0005883(neurofilament)|GO:0007275(multicellular organismal development)|GO:0007399(nervous system development)|GO:0030154(cell differentiation)|GO:0042246(tissue regeneration)|GO:0060052(neurofilament cytoskeleton organization)	2.57803	2.65523
INADL	InaD-like (Drosophila)	GO:0005515(protein binding)|GO:0005575(cellular_component)|GO:0005886(plasma membrane)|GO:0005923(tight junction)|GO:0007242(intracellular signaling cascade)|GO:0016324(apical plasma membrane)|GO:0030054(cell junction)	0.474123	0.43474
INHBA	inhibin, beta A	GO:0000082(G1/S transition of mitotic cell cycle)|GO:0001501(skeletal system development)|GO:0001541(ovarian follicle development)|GO:0004871(signal transducer activity)|GO:0005125(cytokine activity)|GO:0005179(hormone activity)|GO:0005576(extracellular region)|GO:0006917(induction of apoptosis)|GO:0006952(defense response)|GO:0007050(cell cycle arrest)|GO:0007166(cell surface receptor linked sig…	5.60552	5.60653
INHBB	inhibin, beta B	GO:0001541(ovarian follicle development)|GO:0005125(cytokine activity)|GO:0005179(hormone activity)|GO:0005576(extracellular region)|GO:0006952(defense response)|GO:0008083(growth factor activity)|GO:0009605(response to external stimulus)|GO:0030154(cell differentiation)|GO:0040007(growth)|GO:0042803(protein homodimerization activity)|GO:0046676(negative regulation of insulin secretion)|GO:004678…	2.08123	2.56968
INSM1	insulinoma-associated 1	GO:0003677(DNA binding)|GO:0005622(intracellular)|GO:0005634(nucleus)|GO:0008270(zinc ion binding)|GO:0030154(cell differentiation)|GO:0031018(endocrine pancreas development)|GO:0045449(regulation of transcription)|GO:0046872(metal ion binding)	2.36228	2.14368
IPMK	inositol polyphosphate multikinase	GO:0000166(nucleotide binding)|GO:0005524(ATP binding)|GO:0005634(nucleus)|GO:0008440(inositol trisphosphate 3-kinase activity)|GO:0016301(kinase activity)|GO:0016740(transferase activity)	2.34721	2.13785
IRX3	iroquois homeobox 3	GO:0003700(transcription factor activity)|GO:0005634(nucleus)|GO:0005737(cytoplasm)|GO:0006355(regulation of transcription, DNA-dependent)|GO:0043565(sequence-specific DNA binding)|GO:0045665(negative regulation of neuron differentiation)|GO:0045666(positive regulation of neuron differentiation)	2.12008	2.81011
IRX4	iroquois homeobox 4	GO:0003700(transcription factor activity)|GO:0005634(nucleus)|GO:0006355(regulation of transcription, DNA-dependent)|GO:0007507(heart development)|GO:0043565(sequence-specific DNA binding)	2.30835	2.47677
ISLR2	immunoglobulin superfamily containing leucine-rich repeat 2	GO:0005515(protein binding)|GO:0016020(membrane)|GO:0016021(integral to membrane)	2.04247	2.20747
ITGBL1	integrin, beta-like 1 (with EGF-like repeat domains)	GO:0004872(receptor activity)|GO:0005488(binding)|GO:0005576(extracellular region)|GO:0007155(cell adhesion)|GO:0007160(cell-matrix adhesion)|GO:0007229(integrin-mediated signaling pathway)|GO:0008305(integrin complex)	2.31404	2.10578
ITLN1	intelectin 1 (galactofuranose binding)	GO:0001934(positive regulation of protein amino acid phosphorylation)|GO:0005102(receptor binding)|GO:0005529(sugar binding)|GO:0005576(extracellular region)|GO:0005886(plasma membrane)|GO:0007165(signal transduction)|GO:0009624(response to nematode)|GO:0031225(anchored to membrane)|GO:0031526(brush border membrane)|GO:0045121(membrane raft)|GO:0046326(positive regulation of glucose import)	3.147	3.35606
JUB	jub, ajuba homolog (Xenopus laevis)	GO:0005515(protein binding)|GO:0005634(nucleus)|GO:0005737(cytoplasm)|GO:0005813(centrosome)|GO:0005856(cytoskeleton)|GO:0005886(plasma membrane)|GO:0005925(focal adhesion)|GO:0007049(cell cycle)|GO:0007155(cell adhesion)|GO:0008270(zinc ion binding)|GO:0030027(lamellipodium)|GO:0030032(lamellipodium assembly)|GO:0030054(cell junction)|GO:0030334(regulation of cell migration)|GO:0035313(wound hea…	0.474138	0.463404
JUNB	jun B proto-oncogene	GO:0000785(chromatin)|GO:0001570(vasculogenesis)|GO:0001829(trophectodermal cell differentiation)|GO:0001892(embryonic placenta development)|GO:0003690(double-stranded DNA binding)|GO:0003700(transcription factor activity)|GO:0003702(RNA polymerase II transcription factor activity)|GO:0003713(transcription coactivator activity)|GO:0003714(transcription corepressor activity)|GO:0005634(nucleus)|GO…	2.30579	2.06144
KANK2	KN motif and ankyrin repeat domains 2		2.53241	3.13959
KATNAL2	katanin p60 subunit A-like 2	GO:0000166(nucleotide binding)|GO:0005524(ATP binding)|GO:0005874(microtubule)|GO:0008568(microtubule-severing ATPase activity)|GO:0016787(hydrolase activity)|GO:0017111(nucleoside-triphosphatase activity)	0.361863	0.323176
KBTBD5	kelch repeat and BTB (POZ) domain containing 5	GO:0005515(protein binding)	2.47307	2.51085
KCNAB1	potassium voltage-gated channel, shaker-related subfamily, beta member 1	GO:0005244(voltage-gated ion channel activity)|GO:0005249(voltage-gated potassium channel activity)|GO:0005737(cytoplasm)|GO:0006811(ion transport)|GO:0006813(potassium ion transport)|GO:0015459(potassium channel regulator activity)|GO:0016021(integral to membrane)|GO:0016491(oxidoreductase activity)|GO:0030955(potassium ion binding)|GO:0055085(transmembrane transport)|GO:0055114(oxidation reduct…	2.52341	2.00213
KCND3	potassium voltage-gated channel, Shal-related subfamily, member 3	GO:0005244(voltage-gated ion channel activity)|GO:0005249(voltage-gated potassium channel activity)|GO:0005250(A-type (transient outward) potassium channel activity)|GO:0005515(protein binding)|GO:0006811(ion transport)|GO:0006813(potassium ion transport)|GO:0008076(voltage-gated potassium channel complex)|GO:0008270(zinc ion binding)|GO:0016021(integral to membrane)|GO:0030955(potassium ion bind…	2.3873	2.77765
KCNG1	potassium voltage-gated channel, subfamily G, member 1	GO:0005244(voltage-gated ion channel activity)|GO:0005249(voltage-gated potassium channel activity)|GO:0005515(protein binding)|GO:0006811(ion transport)|GO:0006813(potassium ion transport)|GO:0008076(voltage-gated potassium channel complex)|GO:0016020(membrane)|GO:0016021(integral to membrane)|GO:0030955(potassium ion binding)|GO:0055085(transmembrane transport)	2.40401	2.66094
KCNH2	potassium voltage-gated channel, subfamily H (eag-related), member 2	GO:0000155(two-component sensor activity)|GO:0000160(two-component signal transduction system (phosphorelay))|GO:0005242(inward rectifier potassium channel activity)|GO:0005244(voltage-gated ion channel activity)|GO:0005251(delayed rectifier potassium channel activity)|GO:0005635(nuclear envelope)|GO:0005737(cytoplasm)|GO:0005886(plasma membrane)|GO:0006355(regulation of transcription, DNA-depend…	2.12704	2.06061
KCNH8	potassium voltage-gated channel, subfamily H (eag-related), member 8	GO:0000155(two-component sensor activity)|GO:0000160(two-component signal transduction system (phosphorelay))|GO:0003705(RNA polymerase II transcription factor activity, enhancer binding)|GO:0005244(voltage-gated ion channel activity)|GO:0005249(voltage-gated potassium channel activity)|GO:0006355(regulation of transcription, DNA-dependent)|GO:0006811(ion transport)|GO:0006813(potassium ion trans…	0.383509	0.419139
KCNJ15	potassium inwardly-rectifying channel, subfamily J, member 15	GO:0005242(inward rectifier potassium channel activity)|GO:0005244(voltage-gated ion channel activity)|GO:0005267(potassium channel activity)|GO:0005515(protein binding)|GO:0005737(cytoplasm)|GO:0005886(plasma membrane)|GO:0005887(integral to plasma membrane)|GO:0005925(focal adhesion)|GO:0006811(ion transport)|GO:0006813(potassium ion transport)|GO:0030955(potassium ion binding)	5.10445	4.06734
KCNJ2	potassium inwardly-rectifying channel, subfamily J, member 2	GO:0005242(inward rectifier potassium channel activity)|GO:0005244(voltage-gated ion channel activity)|GO:0005515(protein binding)|GO:0005887(integral to plasma membrane)|GO:0006811(ion transport)|GO:0006813(potassium ion transport)|GO:0016020(membrane)|GO:0030425(dendrite)|GO:0030955(potassium ion binding)|GO:0043025(cell soma)	3.43226	3.16967
KCNK15	potassium channel, subfamily K, member 15	GO:0005244(voltage-gated ion channel activity)|GO:0005267(potassium channel activity)|GO:0006811(ion transport)|GO:0006813(potassium ion transport)|GO:0016020(membrane)|GO:0016021(integral to membrane)|GO:0030955(potassium ion binding)	2.14619	2.45895
KCNMA1	potassium large conductance calcium-activated channel, subfamily M, alpha member 1	GO:0000287(magnesium ion binding)|GO:0001666(response to hypoxia)|GO:0003779(actin binding)|GO:0003824(catalytic activity)|GO:0005244(voltage-gated ion channel activity)|GO:0005249(voltage-gated potassium channel activity)|GO:0005509(calcium ion binding)|GO:0005515(protein binding)|GO:0005901(caveola)|GO:0006811(ion transport)|GO:0006813(potassium ion transport)|GO:0006970(response to osmotic str…	2.5462	2.71387
KCNQ3	potassium voltage-gated channel, KQT-like subfamily, member 3	GO:0005244(voltage-gated ion channel activity)|GO:0005249(voltage-gated potassium channel activity)|GO:0006811(ion transport)|GO:0006813(potassium ion transport)|GO:0007268(synaptic transmission)|GO:0008076(voltage-gated potassium channel complex)|GO:0016020(membrane)|GO:0016021(integral to membrane)|GO:0030955(potassium ion binding)|GO:0055085(transmembrane transport)	2.3933	2.80098
KDELC1	KDEL (Lys-Asp-Glu-Leu) containing 1	GO:0005783(endoplasmic reticulum)|GO:0005788(endoplasmic reticulum lumen)	0.482601	0.459966
KEL	Kell blood group, metallo-endopeptidase	GO:0004222(metalloendopeptidase activity)|GO:0005515(protein binding)|GO:0005886(plasma membrane)|GO:0005887(integral to plasma membrane)|GO:0006487(protein amino acid N-linked glycosylation)|GO:0006508(proteolysis)|GO:0008233(peptidase activity)|GO:0008270(zinc ion binding)|GO:0042310(vasoconstriction)|GO:0046872(metal ion binding)	2.10288	2.23547
KHDRBS2	KH domain containing, RNA binding, signal transduction associated 2	GO:0003723(RNA binding)|GO:0005515(protein binding)|GO:0005634(nucleus)|GO:0005737(cytoplasm)|GO:0008143(poly(A) RNA binding)|GO:0008266(poly(U) RNA binding)|GO:0017124(SH3 domain binding)|GO:0042169(SH2 domain binding)|GO:0045449(regulation of transcription)|GO:0046982(protein heterodimerization activity)	0.416476	0.360158
KIF5C	kinesin family member 5C	GO:0000166(nucleotide binding)|GO:0003777(microtubule motor activity)|GO:0005515(protein binding)|GO:0005524(ATP binding)|GO:0005737(cytoplasm)|GO:0005871(kinesin complex)|GO:0005874(microtubule)|GO:0006996(organelle organization)|GO:0007018(microtubule-based movement)|GO:0008045(motor axon guidance)|GO:0035253(ciliary rootlet)|GO:0043005(neuron projection)	0.475861	0.473217
KIRREL	kin of IRRE like (Drosophila)	GO:0005886(plasma membrane)|GO:0016021(integral to membrane)	2.16496	2.19525
KLF14	Kruppel-like factor 14	GO:0003677(DNA binding)|GO:0005622(intracellular)|GO:0005634(nucleus)|GO:0008270(zinc ion binding)|GO:0045449(regulation of transcription)|GO:0046872(metal ion binding)	2.75615	3.28673
KLF16	Kruppel-like factor 16	GO:0003700(transcription factor activity)|GO:0005622(intracellular)|GO:0005634(nucleus)|GO:0006357(regulation of transcription from RNA polymerase II promoter)|GO:0007212(dopamine receptor signaling pathway)|GO:0008270(zinc ion binding)|GO:0045449(regulation of transcription)|GO:0046872(metal ion binding)	2.04329	2.25619
KLF5	Kruppel-like factor 5 (intestinal)	GO:0001525(angiogenesis)|GO:0003700(transcription factor activity)|GO:0003702(RNA polymerase II transcription factor activity)|GO:0005515(protein binding)|GO:0005622(intracellular)|GO:0005634(nucleus)|GO:0006355(regulation of transcription, DNA-dependent)|GO:0006366(transcription from RNA polymerase II promoter)|GO:0008270(zinc ion binding)|GO:0008284(positive regulation of cell proliferation)|GO…	2.44218	2.42619
KLF8	Kruppel-like factor 8	GO:0003677(DNA binding)|GO:0005622(intracellular)|GO:0005634(nucleus)|GO:0008270(zinc ion binding)|GO:0045449(regulation of transcription)|GO:0046872(metal ion binding)	0.40369	0.450833
KLHDC7A	kelch domain containing 7A	GO:0016020(membrane)|GO:0016021(integral to membrane)	2.21572	3.50359
KLHL14	kelch-like 14 (Drosophila)	GO:0005515(protein binding)	0.439317	0.325834
KLHL2	kelch-like 2, Mayven (Drosophila)	GO:0003779(actin binding)|GO:0005215(transporter activity)|GO:0005515(protein binding)|GO:0005737(cytoplasm)|GO:0006886(intracellular protein transport)|GO:0015629(actin cytoskeleton)	2.39306	2.05869
KLHL33	kelch-like 33 (Drosophila)	GO:0005515(protein binding)	3.79494	4.25013
KLKB1	kallikrein B, plasma (Fletcher factor) 1	GO:0002542(Factor XII activation)|GO:0004252(serine-type endopeptidase activity)|GO:0005576(extracellular region)|GO:0005615(extracellular space)|GO:0005737(cytoplasm)|GO:0006508(proteolysis)|GO:0006954(inflammatory response)|GO:0007596(blood coagulation)|GO:0008233(peptidase activity)|GO:0031639(plasminogen activation)|GO:0051919(positive regulation of fibrinolysis)	2.17134	2.26934
KREMEN1	kringle containing transmembrane protein 1	GO:0003674(molecular_function)|GO:0005624(membrane fraction)|GO:0007154(cell communication)|GO:0016020(membrane)|GO:0016021(integral to membrane)|GO:0016055(Wnt receptor signaling pathway)	4.17231	4.51393
KRT1	keratin 1	GO:0001867(complement activation, lectin pathway)|GO:0004872(receptor activity)|GO:0005200(structural constituent of cytoskeleton)|GO:0005515(protein binding)|GO:0005529(sugar binding)|GO:0005856(cytoskeleton)|GO:0005886(plasma membrane)|GO:0006979(response to oxidative stress)|GO:0008544(epidermis development)|GO:0042730(fibrinolysis)|GO:0045095(keratin filament)|GO:0045765(regulation of angioge…	2.10438	2.50317
KRT23	keratin 23 (histone deacetylase inducible)	GO:0005198(structural molecule activity)|GO:0005882(intermediate filament)	2.21582	2.17811
KRT7	keratin 7	GO:0005198(structural molecule activity)|GO:0005515(protein binding)|GO:0005737(cytoplasm)|GO:0006260(DNA replication)|GO:0006417(regulation of translation)|GO:0007010(cytoskeleton organization)|GO:0044419(interspecies interaction between organisms)|GO:0045095(keratin filament)|GO:0051325(interphase)	0.41368	0.457123
KRT72	keratin 72	GO:0005198(structural molecule activity)|GO:0045095(keratin filament)	0.247212	0.280391
KRT76	keratin 76	GO:0005198(structural molecule activity)|GO:0007010(cytoskeleton organization)|GO:0045095(keratin filament)	2.2535	2.06587
KRT85	keratin 85	GO:0005198(structural molecule activity)|GO:0005515(protein binding)|GO:0008544(epidermis development)|GO:0045095(keratin filament)	2.04551	2.24748
KRTAP1-1	keratin associated protein 1-1	GO:0005576(extracellular region)|GO:0008150(biological_process)|GO:0030280(structural constituent of epidermis)|GO:0045095(keratin filament)	2.11642	2.72449
KRTAP15-1	keratin associated protein 15-1	GO:0005882(intermediate filament)	2.48738	2.4163
KRTAP2-1	keratin associated protein 2-1	GO:0045095(keratin filament)	2.34402	2.46159
KRTAP2-4	keratin associated protein 2-4	GO:0045095(keratin filament)	2.05968	2.30203
KRTAP9-9	keratin associated protein 9-9	GO:0045095(keratin filament)	2.66401	2.84492
LAMC3	laminin, gamma 3	GO:0005198(structural molecule activity)|GO:0005515(protein binding)|GO:0005576(extracellular region)|GO:0005604(basement membrane)|GO:0007155(cell adhesion)|GO:0016020(membrane)	2.79153	2.99263
LARS	leucyl-tRNA synthetase	GO:0000166(nucleotide binding)|GO:0004823(leucine-tRNA ligase activity)|GO:0005524(ATP binding)|GO:0005737(cytoplasm)|GO:0005829(cytosol)|GO:0006429(leucyl-tRNA aminoacylation)|GO:0016874(ligase activity)	2.05832	2.18967
LAT2	linker for activation of T cells family, member 2	GO:0005515(protein binding)|GO:0005886(plasma membrane)|GO:0006955(immune response)|GO:0007242(intracellular signaling cascade)|GO:0016021(integral to membrane)|GO:0019722(calcium-mediated signaling)|GO:0042113(B cell activation)|GO:0042169(SH2 domain binding)|GO:0043303(mast cell degranulation)|GO:0045121(membrane raft)|GO:0050853(B cell receptor signaling pathway)	2.24427	2.14182
LBX2	ladybird homeobox 2	GO:0003700(transcription factor activity)|GO:0005634(nucleus)|GO:0006355(regulation of transcription, DNA-dependent)|GO:0043565(sequence-specific DNA binding)	2.69085	2.79897
LCE5A	late cornified envelope 5A	GO:0031424(keratinization)	2.41397	2.72348
LCN2	lipocalin 2	GO:0005215(transporter activity)|GO:0005488(binding)|GO:0005576(extracellular region)|GO:0006810(transport)	4.58716	3.63735
LEPREL2	leprecan-like 2	GO:0005506(iron ion binding)|GO:0005783(endoplasmic reticulum)|GO:0016702(oxidoreductase activity, acting on single donors with incorporation of molecular oxygen, incorporation of two atoms of oxygen)|GO:0016705(oxidoreductase activity, acting on paired donors, with incorporation or reduction of molecular oxygen)|GO:0019797(procollagen-proline 3-dioxygenase activity)|GO:0031418(L-ascorbic acid bi…	2.10201	2.25591
LGALS12	lectin, galactoside-binding, soluble, 12	GO:0005529(sugar binding)|GO:0005634(nucleus)|GO:0006915(apoptosis)|GO:0008629(induction of apoptosis by intracellular signals)|GO:0030395(lactose binding)	2.18148	2.1621
LHB	luteinizing hormone beta polypeptide	GO:0005179(hormone activity)|GO:0005576(extracellular region)|GO:0005625(soluble fraction)|GO:0006701(progesterone biosynthetic process)|GO:0007165(signal transduction)|GO:0007186(G-protein coupled receptor protein signaling pathway)|GO:0007267(cell-cell signaling)|GO:0008584(male gonad development)	2.64484	2.67635
LILRA2	leukocyte immunoglobulin-like receptor, subfamily A (with TM domain), member 2	GO:0003823(antigen binding)|GO:0004872(receptor activity)|GO:0006952(defense response)|GO:0006955(immune response)|GO:0007165(signal transduction)|GO:0016020(membrane)|GO:0016021(integral to membrane)	2.37082	2.06591
LILRA5	leukocyte immunoglobulin-like receptor, subfamily A (with TM domain), member 5	GO:0004872(receptor activity)|GO:0005576(extracellular region)|GO:0006955(immune response)|GO:0016020(membrane)|GO:0016021(integral to membrane)	2.86103	2.37861
LILRB3	leukocyte immunoglobulin-like receptor, subfamily B (with TM and ITIM domains), member 3	GO:0004888(transmembrane receptor activity)|GO:0005887(integral to plasma membrane)|GO:0006952(defense response)|GO:0006955(immune response)|GO:0007166(cell surface receptor linked signal transduction)|GO:0016020(membrane)	2.10796	2.1237
LILRB4	leukocyte immunoglobulin-like receptor, subfamily B (with TM and ITIM domains), member 4	GO:0003823(antigen binding)|GO:0004872(receptor activity)|GO:0005886(plasma membrane)|GO:0006955(immune response)|GO:0007165(signal transduction)|GO:0016021(integral to membrane)	3.05661	3.13474
LIMK2	LIM domain kinase 2	GO:0000166(nucleotide binding)|GO:0004674(protein serine/threonine kinase activity)|GO:0005515(protein binding)|GO:0005524(ATP binding)|GO:0005634(nucleus)|GO:0005737(cytoplasm)|GO:0005739(mitochondrion)|GO:0006468(protein amino acid phosphorylation)|GO:0008270(zinc ion binding)|GO:0016740(transferase activity)|GO:0046872(metal ion binding)	3.30278	3.07104
LIN7A	lin-7 homolog A (C. elegans)	GO:0005515(protein binding)|GO:0005886(plasma membrane)|GO:0005923(tight junction)|GO:0006461(protein complex assembly)|GO:0006887(exocytosis)|GO:0007269(neurotransmitter secretion)|GO:0015031(protein transport)|GO:0016323(basolateral plasma membrane)|GO:0019717(synaptosome)|GO:0019898(extrinsic to membrane)|GO:0030054(cell junction)|GO:0030165(PDZ domain binding)|GO:0045202(synapse)|GO:0045211(p…	4.03542	3.18695
LMNB1	lamin B1	GO:0005198(structural molecule activity)|GO:0005634(nucleus)|GO:0005635(nuclear envelope)|GO:0005638(lamin filament)|GO:0016020(membrane)|GO:0016363(nuclear matrix)	3.58348	3.41433
LPCAT2	lysophosphatidylcholine acyltransferase 2	GO:0005509(calcium ion binding)|GO:0005783(endoplasmic reticulum)|GO:0005794(Golgi apparatus)|GO:0005795(Golgi stack)|GO:0006663(platelet activating factor biosynthetic process)|GO:0008152(metabolic process)|GO:0008415(acyltransferase activity)|GO:0008654(phospholipid biosynthetic process)|GO:0016020(membrane)|GO:0016021(integral to membrane)|GO:0016044(membrane organization)|GO:0016740(transfera…	2.95815	2.58045
LPGAT1	lysophosphatidylglycerol acyltransferase 1	GO:0003674(molecular_function)|GO:0005737(cytoplasm)|GO:0005783(endoplasmic reticulum)|GO:0008152(metabolic process)|GO:0008415(acyltransferase activity)|GO:0008654(phospholipid biosynthetic process)|GO:0016020(membrane)|GO:0016021(integral to membrane)|GO:0016740(transferase activity)	2.04958	2.45493
LPPR2	lipid phosphate phosphatase-related protein type 2		2.40305	2.06508
LRAT	lecithin retinol acyltransferase (phosphatidylcholine--retinol O-acyltransferase)	GO:0001972(retinoic acid binding)|GO:0005783(endoplasmic reticulum)|GO:0005792(microsome)|GO:0007601(visual perception)|GO:0009790(embryonic development)|GO:0016020(membrane)|GO:0016021(integral to membrane)|GO:0016740(transferase activity)|GO:0019841(retinol binding)|GO:0042572(retinol metabolic process)|GO:0047173(phosphatidylcholine-retinol O-acyltransferase activity)|GO:0050896(response to st…	2.57618	3.00216
LRFN3	leucine rich repeat and fibronectin type III domain containing 3	GO:0005515(protein binding)|GO:0016020(membrane)|GO:0016021(integral to membrane)	0.465511	0.46465
LRG1	leucine-rich alpha-2-glycoprotein 1	GO:0003674(molecular_function)|GO:0005515(protein binding)|GO:0005576(extracellular region)|GO:0005634(nucleus)|GO:0005783(endoplasmic reticulum)|GO:0008150(biological_process)|GO:0016020(membrane)|GO:0050873(brown fat cell differentiation)	3.79073	3.79024
LRP3	low density lipoprotein receptor-related protein 3	GO:0004872(receptor activity)|GO:0005905(coated pit)|GO:0006898(receptor-mediated endocytosis)|GO:0016020(membrane)|GO:0016021(integral to membrane)	2.70573	2.58257
LRRC4	leucine rich repeat containing 4	GO:0005515(protein binding)|GO:0016020(membrane)|GO:0016021(integral to membrane)	2.86972	2.34972
LRRK2	leucine-rich repeat kinase 2	GO:0000165(MAPKKK cascade)|GO:0000166(nucleotide binding)|GO:0005096(GTPase activator activity)|GO:0005515(protein binding)|GO:0005524(ATP binding)|GO:0005525(GTP binding)|GO:0005622(intracellular)|GO:0005737(cytoplasm)|GO:0005792(microsome)|GO:0005802(trans-Golgi network)|GO:0005886(plasma membrane)|GO:0007264(small GTPase mediated signal transduction)|GO:0008021(synaptic vesicle)|GO:0016740(tra…	2.81661	2.43952
LTB4R	leukotriene B4 receptor	GO:0000166(nucleotide binding)|GO:0001632(leukotriene B4 receptor activity)|GO:0004872(receptor activity)|GO:0005886(plasma membrane)|GO:0005887(integral to plasma membrane)|GO:0006928(cell motion)|GO:0006936(muscle contraction)|GO:0006954(inflammatory response)|GO:0006955(immune response)|GO:0007165(signal transduction)|GO:0007200(activation of phospholipase C activity by G-protein coupled recep…	2.25961	2.09534
LTBP4	latent transforming growth factor beta binding protein 4	GO:0001558(regulation of cell growth)|GO:0005024(transforming growth factor beta receptor activity)|GO:0005178(integrin binding)|GO:0005509(calcium ion binding)|GO:0005539(glycosaminoglycan binding)|GO:0005576(extracellular region)|GO:0005578(proteinaceous extracellular matrix)|GO:0006457(protein folding)|GO:0007275(multicellular organismal development)|GO:0017015(regulation of transforming growt…	2.74714	2.36459
LTF	lactotransferrin	GO:0004252(serine-type endopeptidase activity)|GO:0005515(protein binding)|GO:0005576(extracellular region)|GO:0005737(cytoplasm)|GO:0006811(ion transport)|GO:0006826(iron ion transport)|GO:0006879(cellular iron ion homeostasis)|GO:0006959(humoral immune response)|GO:0008199(ferric iron binding)|GO:0008233(peptidase activity)|GO:0042742(defense response to bacterium)|GO:0046872(metal ion binding)	40.0796	35.5069
LVRN	laeverin	GO:0006508(proteolysis)|GO:0008233(peptidase activity)|GO:0008237(metallopeptidase activity)|GO:0008270(zinc ion binding)|GO:0016020(membrane)|GO:0016021(integral to membrane)|GO:0046872(metal ion binding)	2.11527	2.12624
LY96	lymphocyte antigen 96	GO:0001875(lipopolysaccharide receptor activity)|GO:0005515(protein binding)|GO:0005576(extracellular region)|GO:0005615(extracellular space)|GO:0005886(plasma membrane)|GO:0006954(inflammatory response)|GO:0006955(immune response)|GO:0006968(cellular defense response)|GO:0007166(cell surface receptor linked signal transduction)|GO:0007249(I-kappaB kinase/NF-kappaB cascade)|GO:0015026(coreceptor …	3.05464	2.85896
LYNX1	Ly6/neurotoxin 1	GO:0005576(extracellular region)|GO:0005886(plasma membrane)|GO:0031225(anchored to membrane)	2.71865	2.55267
LYPD3	LY6/PLAUR domain containing 3	GO:0005886(plasma membrane)|GO:0006928(cell motion)|GO:0007160(cell-matrix adhesion)|GO:0016021(integral to membrane)|GO:0043236(laminin binding)|GO:0046658(anchored to plasma membrane)	2.35936	2.19053
MACC1	metastasis associated in colon cancer 1	GO:0005634(nucleus)|GO:0005737(cytoplasm)|GO:0008083(growth factor activity)|GO:0045449(regulation of transcription)|GO:0051781(positive regulation of cell division)	0.443878	0.348693
MACROD2	MACRO domain containing 2		0.453114	0.358594
MAGEB2	melanoma antigen family B, 2	GO:0005515(protein binding)	2.82353	2.85741
MAK	male germ cell-associated kinase	GO:0000166(nucleotide binding)|GO:0004693(cyclin-dependent protein kinase activity)|GO:0005524(ATP binding)|GO:0006468(protein amino acid phosphorylation)|GO:0007275(multicellular organismal development)|GO:0007283(spermatogenesis)|GO:0016740(transferase activity)|GO:0030154(cell differentiation)	3.37296	2.97306
MAN1A1	mannosidase, alpha, class 1A, member 1	GO:0000139(Golgi membrane)|GO:0004571(mannosyl-oligosaccharide 1,2-alpha-mannosidase activity)|GO:0005509(calcium ion binding)|GO:0005624(membrane fraction)|GO:0005783(endoplasmic reticulum)|GO:0005793(ER-Golgi intermediate compartment)|GO:0005794(Golgi apparatus)|GO:0008152(metabolic process)|GO:0015923(mannosidase activity)|GO:0016020(membrane)|GO:0016021(integral to membrane)|GO:0016798(hydrol…	2.25888	2.01754
MAN1C1	mannosidase, alpha, class 1C, member 1	GO:0004571(mannosyl-oligosaccharide 1,2-alpha-mannosidase activity)|GO:0005509(calcium ion binding)|GO:0005794(Golgi apparatus)|GO:0006487(protein amino acid N-linked glycosylation)|GO:0008152(metabolic process)|GO:0016020(membrane)|GO:0016021(integral to membrane)|GO:0016798(hydrolase activity, acting on glycosyl bonds)|GO:0030173(integral to Golgi membrane)	0.486789	0.484817
MANSC1	MANSC domain containing 1	GO:0016020(membrane)|GO:0016021(integral to membrane)	3.50819	2.98679
MAOA	monoamine oxidase A	GO:0005515(protein binding)|GO:0005739(mitochondrion)|GO:0005741(mitochondrial outer membrane)|GO:0006584(catecholamine metabolic process)|GO:0007610(behavior)|GO:0008131(amine oxidase activity)|GO:0016020(membrane)|GO:0016021(integral to membrane)|GO:0016491(oxidoreductase activity)|GO:0042135(neurotransmitter catabolic process)|GO:0042420(dopamine catabolic process)|GO:0055114(oxidation reducti…	2.22263	2.23285
MAP6D1	MAP6 domain containing 1	GO:0005516(calmodulin binding)|GO:0005737(cytoplasm)|GO:0005794(Golgi apparatus)|GO:0005798(Golgi-associated vesicle)|GO:0005801(cis-Golgi network)|GO:0005856(cytoskeleton)|GO:0007026(negative regulation of microtubule depolymerization)|GO:0008017(microtubule binding)|GO:0018009(N-terminal peptidyl-L-cysteine N-palmitoylation)	2.15417	2.39015
MAP7D2	MAP7 domain containing 2		2.49132	2.62818
MAP9	microtubule-associated protein 9	GO:0005737(cytoplasm)|GO:0005819(spindle)|GO:0005856(cytoskeleton)|GO:0005874(microtubule)|GO:0007049(cell cycle)|GO:0007067(mitosis)|GO:0051301(cell division)	0.473581	0.497434
MAPK14	mitogen-activated protein kinase 14	GO:0000166(nucleotide binding)|GO:0004674(protein serine/threonine kinase activity)|GO:0004707(MAP kinase activity)|GO:0004708(MAP kinase kinase activity)|GO:0005515(protein binding)|GO:0005524(ATP binding)|GO:0005634(nucleus)|GO:0005654(nucleoplasm)|GO:0005737(cytoplasm)|GO:0005829(cytosol)|GO:0006468(protein amino acid phosphorylation)|GO:0006928(cell motion)|GO:0006935(chemotaxis)|GO:0006950(r…	2.39185	2.19393
MBOAT2	membrane bound O-acyltransferase domain containing 2	GO:0003841(1-acylglycerol-3-phosphate O-acyltransferase activity)|GO:0008415(acyltransferase activity)|GO:0008654(phospholipid biosynthetic process)|GO:0016020(membrane)|GO:0016021(integral to membrane)|GO:0016740(transferase activity)	3.12677	2.7245
MBOAT7	membrane bound O-acyltransferase domain containing 7	GO:0008415(acyltransferase activity)|GO:0008654(phospholipid biosynthetic process)|GO:0016020(membrane)|GO:0016021(integral to membrane)|GO:0016740(transferase activity)	2.36881	2.24351
MCF2L	MCF.2 cell line derived transforming sequence-like	GO:0005085(guanyl-nucleotide exchange factor activity)|GO:0005089(Rho guanyl-nucleotide exchange factor activity)|GO:0005622(intracellular)|GO:0005737(cytoplasm)|GO:0005739(mitochondrion)|GO:0005829(cytosol)|GO:0005886(plasma membrane)|GO:0006915(apoptosis)|GO:0007242(intracellular signaling cascade)|GO:0008624(induction of apoptosis by extracellular signals)|GO:0035023(regulation of Rho protein …	0.399772	0.430565
MCTP2	multiple C2 domains, transmembrane 2	GO:0005509(calcium ion binding)|GO:0005544(calcium-dependent phospholipid binding)|GO:0005624(membrane fraction)|GO:0016020(membrane)|GO:0016021(integral to membrane)|GO:0019722(calcium-mediated signaling)	2.32445	2.03574
MDH1	malate dehydrogenase 1, NAD (soluble)	GO:0004470(malic enzyme activity)|GO:0005488(binding)|GO:0005625(soluble fraction)|GO:0005737(cytoplasm)|GO:0005829(cytosol)|GO:0006096(glycolysis)|GO:0006099(tricarboxylic acid cycle)|GO:0006107(oxaloacetate metabolic process)|GO:0006108(malate metabolic process)|GO:0006734(NADH metabolic process)|GO:0016491(oxidoreductase activity)|GO:0030060(L-malate dehydrogenase activity)|GO:0044262(cellular…	0.429539	0.36076
MDK	midkine (neurite growth-promoting factor 2)	GO:0005576(extracellular region)|GO:0007165(signal transduction)|GO:0007275(multicellular organismal development)|GO:0007399(nervous system development)|GO:0008083(growth factor activity)|GO:0008201(heparin binding)|GO:0009611(response to wounding)|GO:0030154(cell differentiation)|GO:0030325(adrenal gland development)|GO:0051781(positive regulation of cell division)	2.33905	3.47039
MEF2D	myocyte enhancer factor 2D	GO:0001649(osteoblast differentiation)|GO:0001958(endochondral ossification)|GO:0002062(chondrocyte differentiation)|GO:0003700(transcription factor activity)|GO:0005515(protein binding)|GO:0005634(nucleus)|GO:0005730(nucleolus)|GO:0005737(cytoplasm)|GO:0006355(regulation of transcription, DNA-dependent)|GO:0006915(apoptosis)|GO:0007275(multicellular organismal development)|GO:0007399(nervous sys…	2.12432	2.55945
MGAM	maltase-glucoamylase (alpha-glucosidase)	GO:0004339(glucan 1,4-alpha-glucosidase activity)|GO:0004553(hydrolase activity, hydrolyzing O-glycosyl compounds)|GO:0004558(alpha-glucosidase activity)|GO:0005886(plasma membrane)|GO:0005975(carbohydrate metabolic process)|GO:0005983(starch catabolic process)|GO:0008152(metabolic process)|GO:0016021(integral to membrane)	4.59559	3.87889
MGAT3	mannosyl (beta-1,4-)-glycoprotein beta-1,4-N-acetylglucosaminyltransferase	GO:0003830(beta-1,4-mannosylglycoprotein 4-beta-N-acetylglucosaminyltransferase activity)|GO:0005794(Golgi apparatus)|GO:0006487(protein amino acid N-linked glycosylation)|GO:0016020(membrane)|GO:0016021(integral to membrane)|GO:0016757(transferase activity, transferring glycosyl groups)	0.46027	0.387928
MIAT	myocardial infarction associated transcript (non-protein coding)		0.411603	0.447262
MKRN1	makorin ring finger protein 1	GO:0003674(molecular_function)|GO:0003676(nucleic acid binding)|GO:0003682(chromatin binding)|GO:0005515(protein binding)|GO:0005575(cellular_component)|GO:0008150(biological_process)|GO:0008270(zinc ion binding)|GO:0046872(metal ion binding)	2.09553	2.55268
MLL3	myeloid/lymphoid or mixed-lineage leukemia 3	GO:0003677(DNA binding)|GO:0005515(protein binding)|GO:0005634(nucleus)|GO:0006355(regulation of transcription, DNA-dependent)|GO:0007242(intracellular signaling cascade)|GO:0008168(methyltransferase activity)|GO:0008270(zinc ion binding)|GO:0016568(chromatin modification)|GO:0016740(transferase activity)|GO:0018024(histone-lysine N-methyltransferase activity)|GO:0046872(metal ion binding)	2.31526	2.58232
MLNR	motilin receptor	GO:0004872(receptor activity)|GO:0005886(plasma membrane)|GO:0005887(integral to plasma membrane)|GO:0007165(signal transduction)|GO:0007186(G-protein coupled receptor protein signaling pathway)|GO:0007586(digestion)|GO:0016520(growth hormone-releasing hormone receptor activity)	2.54406	2.08613
MLXIP	MLX interacting protein	GO:0003677(DNA binding)|GO:0005515(protein binding)|GO:0005634(nucleus)|GO:0005737(cytoplasm)|GO:0005739(mitochondrion)|GO:0005741(mitochondrial outer membrane)|GO:0006913(nucleocytoplasmic transport)|GO:0016020(membrane)|GO:0030528(transcription regulator activity)|GO:0045449(regulation of transcription)	2.16206	2.12638
MLXIPL	MLX interacting protein-like	GO:0000122(negative regulation of transcription from RNA polymerase II promoter)|GO:0003700(transcription factor activity)|GO:0005634(nucleus)|GO:0005667(transcription factor complex)|GO:0005737(cytoplasm)|GO:0007243(protein kinase cascade)|GO:0008134(transcription factor binding)|GO:0009653(anatomical structure morphogenesis)|GO:0010552(positive regulation of gene-specific transcription from RNA…	3.3328	3.15496
MME	membrane metallo-endopeptidase	GO:0004222(metalloendopeptidase activity)|GO:0005515(protein binding)|GO:0005624(membrane fraction)|GO:0005886(plasma membrane)|GO:0005887(integral to plasma membrane)|GO:0006508(proteolysis)|GO:0006518(peptide metabolic process)|GO:0007267(cell-cell signaling)|GO:0008233(peptidase activity)|GO:0008270(zinc ion binding)|GO:0042277(peptide binding)|GO:0046872(metal ion binding)	3.5707	2.89563
MMP1	matrix metallopeptidase 1 (interstitial collagenase)	GO:0004222(metalloendopeptidase activity)|GO:0005509(calcium ion binding)|GO:0005576(extracellular region)|GO:0005578(proteinaceous extracellular matrix)|GO:0006508(proteolysis)|GO:0008152(metabolic process)|GO:0008233(peptidase activity)|GO:0008270(zinc ion binding)|GO:0030574(collagen catabolic process)|GO:0044419(interspecies interaction between organisms)	2.45161	2.7596
MMP25	matrix metallopeptidase 25	GO:0004222(metalloendopeptidase activity)|GO:0005509(calcium ion binding)|GO:0005576(extracellular region)|GO:0005578(proteinaceous extracellular matrix)|GO:0005886(plasma membrane)|GO:0006508(proteolysis)|GO:0006954(inflammatory response)|GO:0008152(metabolic process)|GO:0008233(peptidase activity)|GO:0008270(zinc ion binding)|GO:0009986(cell surface)|GO:0031225(anchored to membrane)	2.8552	2.68596
MMP8	matrix metallopeptidase 8 (neutrophil collagenase)	GO:0001503(ossification)|GO:0004222(metalloendopeptidase activity)|GO:0004252(serine-type endopeptidase activity)|GO:0005509(calcium ion binding)|GO:0005576(extracellular region)|GO:0005578(proteinaceous extracellular matrix)|GO:0005615(extracellular space)|GO:0006508(proteolysis)|GO:0008152(metabolic process)|GO:0008233(peptidase activity)|GO:0008270(zinc ion binding)|GO:0030574(collagen catabol…	54.2836	42.8317
MMP9	matrix metallopeptidase 9 (gelatinase B, 92kDa gelatinase, 92kDa type IV collagenase)	GO:0001501(skeletal system development)|GO:0004222(metalloendopeptidase activity)|GO:0005509(calcium ion binding)|GO:0005518(collagen binding)|GO:0005576(extracellular region)|GO:0005578(proteinaceous extracellular matrix)|GO:0005615(extracellular space)|GO:0006508(proteolysis)|GO:0008152(metabolic process)|GO:0008233(peptidase activity)|GO:0008270(zinc ion binding)|GO:0030198(extracellular matri…	5.91168	5.33083
MON1B	MON1 homolog B (yeast)		2.06023	2.09757
MOSC1	MOCO sulphurase C-terminal domain containing 1	GO:0005739(mitochondrion)|GO:0016491(oxidoreductase activity)|GO:0030151(molybdenum ion binding)|GO:0030170(pyridoxal phosphate binding)|GO:0055114(oxidation reduction)	3.63082	3.04351
MPO	myeloperoxidase	GO:0003682(chromatin binding)|GO:0004601(peroxidase activity)|GO:0005509(calcium ion binding)|GO:0005615(extracellular space)|GO:0005634(nucleus)|GO:0005764(lysosome)|GO:0006916(anti-apoptosis)|GO:0006952(defense response)|GO:0006979(response to oxidative stress)|GO:0016491(oxidoreductase activity)|GO:0020037(heme binding)|GO:0034374(low-density lipoprotein particle remodeling)|GO:0042744(hydroge…	9.29143	7.25093
MRGPRF	MAS-related GPR, member F	GO:0004872(receptor activity)|GO:0004930(G-protein coupled receptor activity)|GO:0005886(plasma membrane)|GO:0007165(signal transduction)|GO:0007186(G-protein coupled receptor protein signaling pathway)|GO:0016021(integral to membrane)	2.03742	2.2307
MRVI1	murine retrovirus integration site 1 homolog	GO:0005737(cytoplasm)|GO:0005789(endoplasmic reticulum membrane)|GO:0016020(membrane)|GO:0016021(integral to membrane)|GO:0016529(sarcoplasmic reticulum)|GO:0048471(perinuclear region of cytoplasm)	3.21935	3.44616
MS4A3	membrane-spanning 4-domains, subfamily A, member 3 (hematopoietic cell-specific)	GO:0004872(receptor activity)|GO:0005515(protein binding)|GO:0005737(cytoplasm)|GO:0007165(signal transduction)|GO:0016020(membrane)|GO:0016021(integral to membrane)|GO:0048471(perinuclear region of cytoplasm)	4.19872	3.95438
MSR1	macrophage scavenger receptor 1	GO:0004872(receptor activity)|GO:0005044(scavenger receptor activity)|GO:0005515(protein binding)|GO:0005887(integral to plasma membrane)|GO:0006898(receptor-mediated endocytosis)|GO:0010744(positive regulation of macrophage derived foam cell differentiation)|GO:0010886(positive regulation of cholesterol storage)|GO:0016020(membrane)|GO:0030169(low-density lipoprotein binding)|GO:0030301(choleste…	2.99798	3.61689
MST1	macrophage stimulating 1 (hepatocyte growth factor-like)	GO:0003824(catalytic activity)|GO:0004252(serine-type endopeptidase activity)|GO:0005509(calcium ion binding)|GO:0005576(extracellular region)|GO:0006508(proteolysis)|GO:0007596(blood coagulation)|GO:0008150(biological_process)	2.1128	2.28495
MUC4	mucin 4, cell surface associated	GO:0005176(ErbB-2 class receptor binding)|GO:0005515(protein binding)|GO:0005576(extracellular region)|GO:0005578(proteinaceous extracellular matrix)|GO:0005887(integral to plasma membrane)|GO:0007155(cell adhesion)|GO:0007160(cell-matrix adhesion)|GO:0008150(biological_process)|GO:0016020(membrane)|GO:0030197(extracellular matrix constituent, lubricant activity)	2.02564	2.39158
MUPCDH	mucin-like protocadherin	GO:0005509(calcium ion binding)|GO:0005515(protein binding)|GO:0005886(plasma membrane)|GO:0005905(coated pit)|GO:0007155(cell adhesion)|GO:0007156(homophilic cell adhesion)|GO:0016021(integral to membrane)|GO:0016339(calcium-dependent cell-cell adhesion)	2.15884	2.72338
MVP	major vault protein	GO:0005515(protein binding)|GO:0005634(nucleus)|GO:0005643(nuclear pore)|GO:0005737(cytoplasm)|GO:0015031(protein transport)|GO:0030529(ribonucleoprotein complex)|GO:0042493(response to drug)|GO:0051028(mRNA transport)|GO:0055085(transmembrane transport)	2.09996	2.18509
MXD1	MAX dimerization protein 1	GO:0003700(transcription factor activity)|GO:0003714(transcription corepressor activity)|GO:0005515(protein binding)|GO:0005634(nucleus)|GO:0007275(multicellular organismal development)|GO:0008283(cell proliferation)|GO:0045449(regulation of transcription)	2.79667	2.47782
MXD3	MAX dimerization protein 3	GO:0003677(DNA binding)|GO:0005634(nucleus)|GO:0030528(transcription regulator activity)|GO:0045449(regulation of transcription)	2.35532	2.43084
MYD88	myeloid differentiation primary response gene (88)	GO:0004888(transmembrane receptor activity)|GO:0005123(death receptor binding)|GO:0005515(protein binding)|GO:0005737(cytoplasm)|GO:0005829(cytosol)|GO:0006916(anti-apoptosis)|GO:0006954(inflammatory response)|GO:0007166(cell surface receptor linked signal transduction)|GO:0031224(intrinsic to membrane)|GO:0043123(positive regulation of I-kappaB kinase/NF-kappaB cascade)|GO:0045087(innate immune …	2.17689	2.01713
MYO1B	myosin IB	GO:0000166(nucleotide binding)|GO:0003774(motor activity)|GO:0003779(actin binding)|GO:0005516(calmodulin binding)|GO:0005524(ATP binding)|GO:0016459(myosin complex)	0.484552	0.463193
MYO1D	myosin ID	GO:0000166(nucleotide binding)|GO:0003774(motor activity)|GO:0003779(actin binding)|GO:0005516(calmodulin binding)|GO:0005524(ATP binding)|GO:0016459(myosin complex)	0.44122	0.405525
MYO7A	myosin VIIA	GO:0000146(microfilament motor activity)|GO:0000166(nucleotide binding)|GO:0001750(photoreceptor outer segment)|GO:0001917(photoreceptor inner segment)|GO:0003779(actin binding)|GO:0005516(calmodulin binding)|GO:0005524(ATP binding)|GO:0005737(cytoplasm)|GO:0005765(lysosomal membrane)|GO:0005829(cytosol)|GO:0005856(cytoskeleton)|GO:0007040(lysosome organization)|GO:0007601(visual perception)|GO:0…	2.15827	2.10064
MYOG	myogenin (myogenic factor 4)	GO:0003700(transcription factor activity)|GO:0005634(nucleus)|GO:0006355(regulation of transcription, DNA-dependent)|GO:0007275(multicellular organismal development)|GO:0007517(muscle organ development)|GO:0016563(transcription activator activity)|GO:0030154(cell differentiation)|GO:0045944(positive regulation of transcription from RNA polymerase II promoter)|GO:0048741(skeletal muscle fiber deve…	2.77382	2.94307
NAIP	NLR family, apoptosis inhibitory protein	GO:0000166(nucleotide binding)|GO:0005622(intracellular)|GO:0006915(apoptosis)|GO:0006916(anti-apoptosis)|GO:0007399(nervous system development)|GO:0008270(zinc ion binding)|GO:0017111(nucleoside-triphosphatase activity)|GO:0046872(metal ion binding)	2.49441	3.08586
NAMPT	nicotinamide phosphoribosyltransferase	GO:0005125(cytokine activity)|GO:0005737(cytoplasm)|GO:0005829(cytosol)|GO:0007165(signal transduction)|GO:0007267(cell-cell signaling)|GO:0008284(positive regulation of cell proliferation)|GO:0016757(transferase activity, transferring glycosyl groups)|GO:0019363(pyridine nucleotide biosynthetic process)|GO:0019674(NAD metabolic process)|GO:0047280(nicotinamide phosphoribosyltransferase activity)	2.88101	3.04474
NCF1	neutrophil cytosolic factor 1	GO:0003924(GTPase activity)|GO:0005515(protein binding)|GO:0005525(GTP binding)|GO:0005625(soluble fraction)|GO:0005737(cytoplasm)|GO:0005829(cytosol)|GO:0006968(cellular defense response)|GO:0007154(cell communication)|GO:0009055(electron carrier activity)|GO:0017124(SH3 domain binding)|GO:0035091(phosphoinositide binding)|GO:0042554(superoxide anion generation)|GO:0043020(NADPH oxidase complex)…	2.08045	2.01097
NCF4	neutrophil cytosolic factor 4, 40kDa	GO:0005737(cytoplasm)|GO:0005829(cytosol)|GO:0006955(immune response)|GO:0007154(cell communication)|GO:0016020(membrane)|GO:0035091(phosphoinositide binding)|GO:0043020(NADPH oxidase complex)|GO:0046983(protein dimerization activity)|GO:0055114(oxidation reduction)	3.38339	3.29784
NCR3	natural cytotoxicity triggering receptor 3	GO:0004872(receptor activity)|GO:0005886(plasma membrane)|GO:0005887(integral to plasma membrane)|GO:0006954(inflammatory response)|GO:0006955(immune response)|GO:0008037(cell recognition)|GO:0045954(positive regulation of natural killer cell mediated cytotoxicity)	0.434858	0.471765
NEUROG3	neurogenin 3	GO:0003690(double-stranded DNA binding)|GO:0003700(transcription factor activity)|GO:0005634(nucleus)|GO:0005737(cytoplasm)|GO:0007275(multicellular organismal development)|GO:0007417(central nervous system development)|GO:0007422(peripheral nervous system development)|GO:0016563(transcription activator activity)|GO:0030855(epithelial cell differentiation)|GO:0045449(regulation of transcription)|…	2.33201	2.82361
NFAM1	NFAT activating protein with ITAM motif 1	GO:0001819(positive regulation of cytokine production)|GO:0004888(transmembrane receptor activity)|GO:0005886(plasma membrane)|GO:0006954(inflammatory response)|GO:0007166(cell surface receptor linked signal transduction)|GO:0007242(intracellular signaling cascade)|GO:0009986(cell surface)|GO:0016021(integral to membrane)|GO:0045121(membrane raft)|GO:0045577(regulation of B cell differentiation)|…	2.11062	2.2067
NFATC2	nuclear factor of activated T-cells, cytoplasmic, calcineurin-dependent 2	GO:0001816(cytokine production)|GO:0003700(transcription factor activity)|GO:0005515(protein binding)|GO:0005634(nucleus)|GO:0005737(cytoplasm)|GO:0005829(cytosol)|GO:0006355(regulation of transcription, DNA-dependent)|GO:0016563(transcription activator activity)|GO:0043565(sequence-specific DNA binding)|GO:0045941(positive regulation of transcription)|GO:0045944(positive regulation of transcript…	0.483499	0.477863
NFATC4	nuclear factor of activated T-cells, cytoplasmic, calcineurin-dependent 4	GO:0003700(transcription factor activity)|GO:0003713(transcription coactivator activity)|GO:0005634(nucleus)|GO:0005737(cytoplasm)|GO:0006355(regulation of transcription, DNA-dependent)|GO:0006366(transcription from RNA polymerase II promoter)|GO:0006954(inflammatory response)|GO:0030154(cell differentiation)	2.11493	2.09366
NFE2	nuclear factor (erythroid-derived 2), 45kDa	GO:0003700(transcription factor activity)|GO:0003713(transcription coactivator activity)|GO:0005634(nucleus)|GO:0005730(nucleolus)|GO:0005856(cytoskeleton)|GO:0006337(nucleosome disassembly)|GO:0006357(regulation of transcription from RNA polymerase II promoter)|GO:0007275(multicellular organismal development)|GO:0007599(hemostasis)|GO:0008015(blood circulation)|GO:0043565(sequence-specific DNA b…	2.10942	2.07823
NF-E4	transcription factor NF-E4	GO:0005634(nucleus)|GO:0045449(regulation of transcription)	3.41444	3.0919
NFIL3	nuclear factor, interleukin 3 regulated	GO:0003700(transcription factor activity)|GO:0003714(transcription corepressor activity)|GO:0005634(nucleus)|GO:0006355(regulation of transcription, DNA-dependent)|GO:0006366(transcription from RNA polymerase II promoter)|GO:0006955(immune response)|GO:0043565(sequence-specific DNA binding)|GO:0046983(protein dimerization activity)|GO:0048511(rhythmic process)	2.68527	2.3282
NGB	neuroglobin	GO:0005344(oxygen transporter activity)|GO:0005833(hemoglobin complex)|GO:0006810(transport)|GO:0015671(oxygen transport)|GO:0019825(oxygen binding)|GO:0020037(heme binding)|GO:0046872(metal ion binding)	2.19334	2.38862
NINJ2	ninjurin 2	GO:0005515(protein binding)|GO:0005887(integral to plasma membrane)|GO:0007155(cell adhesion)|GO:0007158(neuron adhesion)|GO:0007399(nervous system development)|GO:0016020(membrane)|GO:0042246(tissue regeneration)	2.06559	2.35469
NKX2-3	NK2 transcription factor related, locus 3 (Drosophila)	GO:0001776(leukocyte homeostasis)|GO:0002317(plasma cell differentiation)|GO:0003700(transcription factor activity)|GO:0005575(cellular_component)|GO:0005634(nucleus)|GO:0006355(regulation of transcription, DNA-dependent)|GO:0006641(triglyceride metabolic process)|GO:0006955(immune response)|GO:0008150(biological_process)|GO:0009791(post-embryonic development)|GO:0016333(morphogenesis of follicul…	2.2889	2.42613
NKX2-8	NK2 homeobox 8	GO:0001889(liver development)|GO:0003690(double-stranded DNA binding)|GO:0003700(transcription factor activity)|GO:0003702(RNA polymerase II transcription factor activity)|GO:0005575(cellular_component)|GO:0005634(nucleus)|GO:0006355(regulation of transcription, DNA-dependent)|GO:0006366(transcription from RNA polymerase II promoter)|GO:0007275(multicellular organismal development)|GO:0007409(axo…	2.19747	2.40531
NLRC4	NLR family, CARD domain containing 4	GO:0000166(nucleotide binding)|GO:0000287(magnesium ion binding)|GO:0005515(protein binding)|GO:0005524(ATP binding)|GO:0005622(intracellular)|GO:0005737(cytoplasm)|GO:0006919(activation of caspase activity)|GO:0006954(inflammatory response)|GO:0016045(detection of bacterium)|GO:0042742(defense response to bacterium)|GO:0042803(protein homodimerization activity)|GO:0043065(positive regulation of …	2.91561	2.51741
NLRP12	NLR family, pyrin domain containing 12	GO:0000166(nucleotide binding)|GO:0005515(protein binding)|GO:0005524(ATP binding)|GO:0005737(cytoplasm)|GO:0006919(activation of caspase activity)|GO:0008588(release of cytoplasmic sequestered NF-kappaB)|GO:0008656(caspase activator activity)|GO:0031953(negative regulation of protein amino acid autophosphorylation)|GO:0043124(negative regulation of I-kappaB kinase/NF-kappaB cascade)|GO:0045381(r…	2.25174	2.11019
NLRP6	NLR family, pyrin domain containing 6	GO:0000166(nucleotide binding)|GO:0005515(protein binding)|GO:0005524(ATP binding)|GO:0005737(cytoplasm)	2.65128	2.23365
NLRP9	NLR family, pyrin domain containing 9	GO:0000166(nucleotide binding)|GO:0005515(protein binding)|GO:0005524(ATP binding)|GO:0005737(cytoplasm)	2.26383	2.04889
NMNAT2	nicotinamide nucleotide adenylyltransferase 2	GO:0000166(nucleotide binding)|GO:0000287(magnesium ion binding)|GO:0000309(nicotinamide-nucleotide adenylyltransferase activity)|GO:0004515(nicotinate-nucleotide adenylyltransferase activity)|GO:0005524(ATP binding)|GO:0005737(cytoplasm)|GO:0005794(Golgi apparatus)|GO:0009058(biosynthetic process)|GO:0009435(NAD biosynthetic process)|GO:0016740(transferase activity)|GO:0016779(nucleotidyltransfe…	3.85695	2.62706
NMUR2	neuromedin U receptor 2	GO:0001607(neuromedin U receptor activity)|GO:0002023(reduction of food intake in response to dietary excess)|GO:0004872(receptor activity)|GO:0004930(G-protein coupled receptor activity)|GO:0005229(intracellular calcium activated chloride channel activity)|GO:0005525(GTP binding)|GO:0005886(plasma membrane)|GO:0006816(calcium ion transport)|GO:0006940(regulation of smooth muscle contraction)|GO:…	2.63059	2.54867
NOVA2	neuro-oncological ventral antigen 2	GO:0003723(RNA binding)|GO:0005634(nucleus)	3.44965	3.21874
NPBWR1	neuropeptides B/W receptor 1	GO:0004872(receptor activity)|GO:0004930(G-protein coupled receptor activity)|GO:0004985(opioid receptor activity)|GO:0005515(protein binding)|GO:0005886(plasma membrane)|GO:0007165(signal transduction)|GO:0007186(G-protein coupled receptor protein signaling pathway)|GO:0007268(synaptic transmission)|GO:0016021(integral to membrane)|GO:0019222(regulation of metabolic process)	2.50175	2.50707
NPBWR2	neuropeptides B/W receptor 2	GO:0004872(receptor activity)|GO:0004930(G-protein coupled receptor activity)|GO:0004985(opioid receptor activity)|GO:0005515(protein binding)|GO:0005886(plasma membrane)|GO:0007165(signal transduction)|GO:0007186(G-protein coupled receptor protein signaling pathway)|GO:0016021(integral to membrane)	2.30785	2.56316
NPC1L1	NPC1 (Niemann-Pick disease, type C1, gene)-like 1	GO:0005886(plasma membrane)|GO:0006629(lipid metabolic process)|GO:0006695(cholesterol biosynthetic process)|GO:0008158(hedgehog receptor activity)|GO:0008202(steroid metabolic process)|GO:0016021(integral to membrane)|GO:0030299(intestinal cholesterol absorption)|GO:0031410(cytoplasmic vesicle)|GO:0042157(lipoprotein metabolic process)|GO:0042632(cholesterol homeostasis)	2.68338	3.53606
NPEPL1	aminopeptidase-like 1	GO:0004177(aminopeptidase activity)|GO:0005622(intracellular)|GO:0006508(proteolysis)|GO:0008233(peptidase activity)|GO:0008270(zinc ion binding)|GO:0030145(manganese ion binding)|GO:0046872(metal ion binding)	2.3148	2.3292
NPL	N-acetylneuraminate pyruvate lyase (dihydrodipicolinate synthase)	GO:0005737(cytoplasm)|GO:0005975(carbohydrate metabolic process)|GO:0008152(metabolic process)|GO:0008747(N-acetylneuraminate lyase activity)|GO:0016829(lyase activity)	2.90424	2.61414
NPPC	natriuretic peptide precursor C	GO:0001666(response to hypoxia)|GO:0005179(hormone activity)|GO:0005576(extracellular region)|GO:0005615(extracellular space)|GO:0008217(regulation of blood pressure)|GO:0008285(negative regulation of cell proliferation)|GO:0009791(post-embryonic development)|GO:0019229(regulation of vasoconstriction)|GO:0030828(positive regulation of cGMP biosynthetic process)|GO:0040014(regulation of multicellu…	2.30531	2.03225
NR1H2	nuclear receptor subfamily 1, group H, member 2	GO:0003700(transcription factor activity)|GO:0003707(steroid hormone receptor activity)|GO:0005515(protein binding)|GO:0005634(nucleus)|GO:0005737(cytoplasm)|GO:0008270(zinc ion binding)|GO:0010552(positive regulation of gene-specific transcription from RNA polymerase II promoter)|GO:0010745(negative regulation of macrophage derived foam cell differentiation)|GO:0010867(positive regulation of tri…	2.04092	2.16364
NRBF2	nuclear receptor binding factor 2	GO:0005634(nucleus)|GO:0005737(cytoplasm)|GO:0045449(regulation of transcription)	2.50464	2.16067
NRIP3	nuclear receptor interacting protein 3	GO:0004190(aspartic-type endopeptidase activity)|GO:0006508(proteolysis)	2.27947	2.16123
NRSN2	neurensin 2	GO:0003674(molecular_function)|GO:0005886(plasma membrane)|GO:0008150(biological_process)|GO:0016021(integral to membrane)|GO:0030133(transport vesicle)|GO:0043025(cell soma)	4.3917	5.34683
NSUN7	NOL1/NOP2/Sun domain family, member 7	GO:0008168(methyltransferase activity)|GO:0016740(transferase activity)	2.36222	2.87308
NT5DC3	5'-nucleotidase domain containing 3	GO:0000287(magnesium ion binding)|GO:0005829(cytosol)|GO:0016787(hydrolase activity)	3.31584	2.19342
NTN3	netrin 3	GO:0003674(molecular_function)|GO:0005102(receptor binding)|GO:0005576(extracellular region)|GO:0005578(proteinaceous extracellular matrix)|GO:0005794(Golgi apparatus)|GO:0007411(axon guidance)	2.35548	3.07953
NTN4	netrin 4	GO:0005515(protein binding)|GO:0005576(extracellular region)|GO:0005604(basement membrane)|GO:0016322(neuron remodeling)	0.422949	0.453476
NTNG2	netrin G2	GO:0003674(molecular_function)|GO:0005578(proteinaceous extracellular matrix)|GO:0005886(plasma membrane)|GO:0007275(multicellular organismal development)|GO:0007399(nervous system development)|GO:0007409(axonogenesis)|GO:0030154(cell differentiation)|GO:0046658(anchored to plasma membrane)	2.49965	2.14997
NUDT4	nudix (nucleoside diphosphate linked moiety X)-type motif 4	GO:0000287(magnesium ion binding)|GO:0005622(intracellular)|GO:0005737(cytoplasm)|GO:0007242(intracellular signaling cascade)|GO:0008486(diphosphoinositol-polyphosphate diphosphatase activity)|GO:0009187(cyclic nucleotide metabolic process)|GO:0016787(hydrolase activity)|GO:0019722(calcium-mediated signaling)|GO:0019935(cyclic-nucleotide-mediated signaling)|GO:0030145(manganese ion binding)|GO:00…	2.29119	2.28309
NUMBL	numb homolog (Drosophila)-like	GO:0005515(protein binding)|GO:0005737(cytoplasm)|GO:0007399(nervous system development)|GO:0007405(neuroblast proliferation)|GO:0007409(axonogenesis)|GO:0030900(forebrain development)|GO:0034332(adherens junction organization)|GO:0050775(positive regulation of dendrite morphogenesis)	2.87182	3.39224
NUP62CL	nucleoporin 62kDa C-terminal like	GO:0005643(nuclear pore)|GO:0015031(protein transport)|GO:0017056(structural constituent of nuclear pore)	0.476001	0.482705
NXF3	nuclear RNA export factor 3	GO:0000166(nucleotide binding)|GO:0003729(mRNA binding)|GO:0005515(protein binding)|GO:0005622(intracellular)|GO:0005634(nucleus)|GO:0005737(cytoplasm)|GO:0006810(transport)|GO:0016973(poly(A)+ mRNA export from nucleus)|GO:0042272(nuclear RNA export factor complex)	2.22837	2.72845
NXPH4	neurexophilin 4	GO:0003674(molecular_function)|GO:0005576(extracellular region)|GO:0007218(neuropeptide signaling pathway)	2.28137	2.13383
NYX	nyctalopin	GO:0003674(molecular_function)|GO:0005515(protein binding)|GO:0005576(extracellular region)|GO:0005578(proteinaceous extracellular matrix)|GO:0005622(intracellular)|GO:0007601(visual perception)|GO:0050896(response to stimulus)	2.10466	2.14761
OASL	2'-5'-oligoadenylate synthetase-like	GO:0003677(DNA binding)|GO:0003725(double-stranded RNA binding)|GO:0005524(ATP binding)|GO:0005730(nucleolus)|GO:0005737(cytoplasm)|GO:0006955(immune response)|GO:0008150(biological_process)|GO:0016740(transferase activity)|GO:0046966(thyroid hormone receptor binding)	2.66457	2.39817
OBFC2A	oligonucleotide/oligosaccharide-binding fold containing 2A	GO:0000724(double-strand break repair via homologous recombination)|GO:0003697(single-stranded DNA binding)|GO:0003723(RNA binding)|GO:0005634(nucleus)|GO:0006281(DNA repair)|GO:0006974(response to DNA damage stimulus)|GO:0010212(response to ionizing radiation)|GO:0031576(G2/M transition checkpoint)|GO:0070876(SOSS complex)	2.69975	2.60967
OLFM4	olfactomedin 4	GO:0005515(protein binding)|GO:0005576(extracellular region)|GO:0005615(extracellular space)|GO:0007155(cell adhesion)	100.93	87.6561
OLR1	oxidized low density lipoprotein (lectin-like) receptor 1	GO:0004872(receptor activity)|GO:0005041(low-density lipoprotein receptor activity)|GO:0005515(protein binding)|GO:0005529(sugar binding)|GO:0005576(extracellular region)|GO:0005624(membrane fraction)|GO:0005886(plasma membrane)|GO:0005887(integral to plasma membrane)|GO:0006508(proteolysis)|GO:0006954(inflammatory response)|GO:0006955(immune response)|GO:0007155(cell adhesion)|GO:0007159(leukocy…	24.3026	19.4101
OPA3	optic atrophy 3 (autosomal recessive, with chorea and spastic paraplegia)	GO:0005739(mitochondrion)|GO:0007601(visual perception)|GO:0050896(response to stimulus)	2.09185	2.1537
OPLAH	5-oxoprolinase (ATP-hydrolysing)	GO:0000166(nucleotide binding)|GO:0005524(ATP binding)|GO:0016787(hydrolase activity)|GO:0017168(5-oxoprolinase (ATP-hydrolyzing) activity)	2.62958	2.5369
OR2T8	olfactory receptor, family 2, subfamily T, member 8	GO:0004872(receptor activity)|GO:0004984(olfactory receptor activity)|GO:0005886(plasma membrane)|GO:0007165(signal transduction)|GO:0007186(G-protein coupled receptor protein signaling pathway)|GO:0007608(sensory perception of smell)|GO:0016021(integral to membrane)|GO:0050896(response to stimulus)	2.44731	2.76686
OR2W3	olfactory receptor, family 2, subfamily W, member 3	GO:0004872(receptor activity)|GO:0004984(olfactory receptor activity)|GO:0005886(plasma membrane)|GO:0007165(signal transduction)|GO:0007186(G-protein coupled receptor protein signaling pathway)|GO:0007608(sensory perception of smell)|GO:0016021(integral to membrane)|GO:0050896(response to stimulus)	2.50887	2.74826
OR3A1	olfactory receptor, family 3, subfamily A, member 1	GO:0004872(receptor activity)|GO:0004984(olfactory receptor activity)|GO:0005886(plasma membrane)|GO:0007165(signal transduction)|GO:0007186(G-protein coupled receptor protein signaling pathway)|GO:0007608(sensory perception of smell)|GO:0016021(integral to membrane)|GO:0050896(response to stimulus)	0.343059	0.401754
OR5V1	olfactory receptor, family 5, subfamily V, member 1	GO:0004872(receptor activity)|GO:0004984(olfactory receptor activity)|GO:0005886(plasma membrane)|GO:0007165(signal transduction)|GO:0007186(G-protein coupled receptor protein signaling pathway)|GO:0007608(sensory perception of smell)|GO:0016021(integral to membrane)|GO:0050896(response to stimulus)	2.15661	2.28497
OR6W1P	olfactory receptor, family 6, subfamily W, member 1 pseudogene		2.844	3.73319
ORM1	orosomucoid 1	GO:0002682(regulation of immune system process)|GO:0005515(protein binding)|GO:0005576(extracellular region)|GO:0005615(extracellular space)|GO:0006953(acute-phase response)|GO:0006954(inflammatory response)	5.41498	5.56645
ORM2	orosomucoid 2	GO:0002682(regulation of immune system process)|GO:0005488(binding)|GO:0005576(extracellular region)|GO:0005615(extracellular space)|GO:0006953(acute-phase response)	5.34262	5.25159
OSBP2	oxysterol binding protein 2	GO:0006869(lipid transport)|GO:0008202(steroid metabolic process)|GO:0016020(membrane)|GO:0019898(extrinsic to membrane)	3.10318	3.19371
OSBPL10	oxysterol binding protein-like 10	GO:0006869(lipid transport)|GO:0008202(steroid metabolic process)	0.428047	0.41773
OSBPL1A	oxysterol binding protein-like 1A	GO:0005543(phospholipid binding)|GO:0005622(intracellular)|GO:0006869(lipid transport)|GO:0008202(steroid metabolic process)|GO:0008203(cholesterol metabolic process)|GO:0016192(vesicle-mediated transport)	2.28078	2.07747
OSCAR	osteoclast associated, immunoglobulin-like receptor	GO:0004872(receptor activity)|GO:0005886(plasma membrane)|GO:0016021(integral to membrane)	2.11368	2.02283
OSM	oncostatin M	GO:0002675(positive regulation of acute inflammatory response)|GO:0005125(cytokine activity)|GO:0005147(oncostatin-M receptor binding)|GO:0005576(extracellular region)|GO:0005615(extracellular space)|GO:0005900(oncostatin-M receptor complex)|GO:0006915(apoptosis)|GO:0006955(immune response)|GO:0007275(multicellular organismal development)|GO:0007422(peripheral nervous system development)|GO:00080…	3.41696	3.27861
OSTalpha	organic solute transporter alpha	GO:0005215(transporter activity)|GO:0005886(plasma membrane)|GO:0006810(transport)|GO:0016021(integral to membrane)	3.31159	10.4271
OTOS	otospiralin	GO:0005576(extracellular region)|GO:0007605(sensory perception of sound)	2.19901	2.558
OTP	orthopedia homeobox	GO:0002052(positive regulation of neuroblast proliferation)|GO:0003700(transcription factor activity)|GO:0005634(nucleus)|GO:0006355(regulation of transcription, DNA-dependent)|GO:0007275(multicellular organismal development)|GO:0007399(nervous system development)|GO:0021879(forebrain neuron differentiation)|GO:0021979(hypothalamus cell differentiation)|GO:0021985(neurohypophysis development)|GO:…	2.58838	2.62463
OTUB2	OTU domain, ubiquitin aldehyde binding 2	GO:0005575(cellular_component)|GO:0006519(cellular amino acid and derivative metabolic process)|GO:0008233(peptidase activity)|GO:0008234(cysteine-type peptidase activity)|GO:0016289(CoA hydrolase activity)|GO:0019941(modification-dependent protein catabolic process)	2.16531	2.51274
OTX1	orthodenticle homeobox 1	GO:0003700(transcription factor activity)|GO:0005515(protein binding)|GO:0005634(nucleus)|GO:0006357(regulation of transcription from RNA polymerase II promoter)|GO:0007275(multicellular organismal development)|GO:0009952(anterior/posterior pattern formation)|GO:0030900(forebrain development)|GO:0030901(midbrain development)|GO:0042472(inner ear morphogenesis)|GO:0043565(sequence-specific DNA bin…	2.07158	2.03266
OXER1	oxoeicosanoid (OXE) receptor 1	GO:0004872(receptor activity)|GO:0004930(G-protein coupled receptor activity)|GO:0005886(plasma membrane)|GO:0007165(signal transduction)|GO:0007186(G-protein coupled receptor protein signaling pathway)|GO:0016021(integral to membrane)|GO:0030817(regulation of cAMP biosynthetic process)|GO:0050646(5-oxo-6E,8Z,11Z,14Z-icosatetraenoic acid binding)|GO:0050647(5-hydroxy-6E,8Z,11Z,14Z-icosatetraenoic…	2.15572	2.27818
OXT	oxytocin, prepropeptide	GO:0001696(gastric acid secretion)|GO:0001975(response to amphetamine)|GO:0002027(regulation of heart rate)|GO:0002125(maternal aggressive behavior)|GO:0003077(negative regulation of diuresis)|GO:0003079(positive regulation of natriuresis)|GO:0005179(hormone activity)|GO:0005185(neurohypophyseal hormone activity)|GO:0005515(protein binding)|GO:0005576(extracellular region)|GO:0005615(extracellula…	2.01758	2.05748
P2RY13	purinergic receptor P2Y, G-protein coupled, 13	GO:0004872(receptor activity)|GO:0004930(G-protein coupled receptor activity)|GO:0005783(endoplasmic reticulum)|GO:0005886(plasma membrane)|GO:0007165(signal transduction)|GO:0007186(G-protein coupled receptor protein signaling pathway)|GO:0008150(biological_process)|GO:0016021(integral to membrane)|GO:0045028(purinergic nucleotide receptor activity, G-protein coupled)	3.13979	3.3374
P704P	prostate-specific P704P		0.395728	0.44804
PACSIN1	protein kinase C and casein kinase substrate in neurons 1	GO:0004672(protein kinase activity)|GO:0005737(cytoplasm)|GO:0007010(cytoskeleton organization)|GO:0008092(cytoskeletal protein binding)|GO:0030137(COPI-coated vesicle)|GO:0045806(negative regulation of endocytosis)	0.497787	0.476444
PADI2	peptidyl arginine deiminase, type II	GO:0004668(protein-arginine deiminase activity)|GO:0005509(calcium ion binding)|GO:0005737(cytoplasm)|GO:0006464(protein modification process)|GO:0016787(hydrolase activity)|GO:0018101(peptidyl-citrulline biosynthetic process from peptidyl-arginine)	3.30598	3.68985
PAGE2	P antigen family, member 2 (prostate associated)		2.36692	2.37537
PAGE2B	P antigen family, member 2B		2.2303	2.10264
PAGE5	P antigen family, member 5 (prostate associated)		2.14703	2.10555
PAK1	p21 protein (Cdc42/Rac)-activated kinase 1	GO:0000165(MAPKKK cascade)|GO:0000166(nucleotide binding)|GO:0004674(protein serine/threonine kinase activity)|GO:0005518(collagen binding)|GO:0005524(ATP binding)|GO:0005737(cytoplasm)|GO:0005794(Golgi apparatus)|GO:0005829(cytosol)|GO:0005886(plasma membrane)|GO:0005925(focal adhesion)|GO:0006915(apoptosis)|GO:0006984(ER-nuclear signaling pathway)|GO:0007010(cytoskeleton organization)|GO:001674…	2.32079	2.01177
PARM1	prostate androgen-regulated mucin-like protein 1	GO:0016020(membrane)|GO:0016021(integral to membrane)	0.35997	0.358118
PARP9	poly (ADP-ribose) polymerase family, member 9	GO:0003674(molecular_function)|GO:0003950(NAD+ ADP-ribosyltransferase activity)|GO:0005634(nucleus)|GO:0016477(cell migration)|GO:0016740(transferase activity)	2.45023	2.42536
PARVA	parvin, alpha	GO:0003779(actin binding)|GO:0005515(protein binding)|GO:0005634(nucleus)|GO:0005737(cytoplasm)|GO:0005856(cytoskeleton)|GO:0005886(plasma membrane)|GO:0005925(focal adhesion)|GO:0007155(cell adhesion)|GO:0030027(lamellipodium)|GO:0030036(actin cytoskeleton organization)|GO:0030054(cell junction)|GO:0043234(protein complex)|GO:0051291(protein heterooligomerization)	0.388198	0.485684
PASK	PAS domain containing serine/threonine kinase	GO:0000166(nucleotide binding)|GO:0004674(protein serine/threonine kinase activity)|GO:0004871(signal transducer activity)|GO:0005524(ATP binding)|GO:0005737(cytoplasm)|GO:0005794(Golgi apparatus)|GO:0006355(regulation of transcription, DNA-dependent)|GO:0006468(protein amino acid phosphorylation)|GO:0007165(signal transduction)|GO:0016740(transferase activity)|GO:0042802(identical protein bindin…	0.482311	0.460177
PCDHB2	protocadherin beta 2	GO:0005509(calcium ion binding)|GO:0005515(protein binding)|GO:0005886(plasma membrane)|GO:0005887(integral to plasma membrane)|GO:0007155(cell adhesion)|GO:0007156(homophilic cell adhesion)|GO:0007268(synaptic transmission)|GO:0007416(synapse assembly)|GO:0016339(calcium-dependent cell-cell adhesion)	3.49297	2.9801
PCLO	piccolo (presynaptic cytomatrix protein)	GO:0005215(transporter activity)|GO:0005509(calcium ion binding)|GO:0005522(profilin binding)|GO:0005544(calcium-dependent phospholipid binding)|GO:0005856(cytoskeleton)|GO:0006810(transport)|GO:0007010(cytoskeleton organization)|GO:0008021(synaptic vesicle)|GO:0008270(zinc ion binding)|GO:0016020(membrane)|GO:0016079(synaptic vesicle exocytosis)|GO:0030054(cell junction)|GO:0045202(synapse)	2.27713	2.68929
PCSK2	proprotein convertase subtilisin/kexin type 2	GO:0004252(serine-type endopeptidase activity)|GO:0005615(extracellular space)|GO:0005625(soluble fraction)|GO:0006508(proteolysis)|GO:0007399(nervous system development)|GO:0008233(peptidase activity)|GO:0016020(membrane)|GO:0016540(protein autoprocessing)|GO:0030070(insulin processing)|GO:0030141(secretory granule)|GO:0031410(cytoplasmic vesicle)|GO:0032403(protein complex binding)|GO:0034230(e…	2.7554	2.3542
PDCD1LG2	programmed cell death 1 ligand 2	GO:0003674(molecular_function)|GO:0004872(receptor activity)|GO:0005515(protein binding)|GO:0005576(extracellular region)|GO:0005886(plasma membrane)|GO:0006955(immune response)|GO:0016021(integral to membrane)|GO:0042102(positive regulation of T cell proliferation)|GO:0042130(negative regulation of T cell proliferation)	2.86955	2.64642
PDE8B	phosphodiesterase 8B	GO:0000156(two-component response regulator activity)|GO:0000160(two-component signal transduction system (phosphorelay))|GO:0000287(magnesium ion binding)|GO:0004114(3',5'-cyclic-nucleotide phosphodiesterase activity)|GO:0005575(cellular_component)|GO:0006198(cAMP catabolic process)|GO:0006355(regulation of transcription, DNA-dependent)|GO:0009187(cyclic nucleotide metabolic process)|GO:0016787(…	0.368031	0.329286
PDGFD	platelet derived growth factor D	GO:0000139(Golgi membrane)|GO:0005576(extracellular region)|GO:0008083(growth factor activity)|GO:0016020(membrane)|GO:0050730(regulation of peptidyl-tyrosine phosphorylation)|GO:0051781(positive regulation of cell division)	0.490225	0.427758
PFKFB3	6-phosphofructo-2-kinase/fructose-2,6-biphosphatase 3	GO:0000166(nucleotide binding)|GO:0003873(6-phosphofructo-2-kinase activity)|GO:0004331(fructose-2,6-bisphosphate 2-phosphatase activity)|GO:0005524(ATP binding)|GO:0005575(cellular_component)|GO:0005829(cytosol)|GO:0006003(fructose 2,6-bisphosphate metabolic process)|GO:0008152(metabolic process)|GO:0016301(kinase activity)|GO:0016740(transferase activity)|GO:0016787(hydrolase activity)|GO:00428…	2.61723	3.18349
PGD	phosphogluconate dehydrogenase	GO:0004616(phosphogluconate dehydrogenase (decarboxylating) activity)|GO:0005515(protein binding)|GO:0005737(cytoplasm)|GO:0009051(pentose-phosphate shunt, oxidative branch)|GO:0016491(oxidoreductase activity)|GO:0019322(pentose biosynthetic process)|GO:0050661(NADP or NADPH binding)|GO:0055114(oxidation reduction)	2.35017	2.09451
PGLYRP1	peptidoglycan recognition protein 1	GO:0005515(protein binding)|GO:0005576(extracellular region)|GO:0008367(bacterial binding)|GO:0008745(N-acetylmuramoyl-L-alanine amidase activity)|GO:0009253(peptidoglycan catabolic process)|GO:0016019(peptidoglycan receptor activity)|GO:0016045(detection of bacterium)|GO:0045087(innate immune response)|GO:0045187(regulation of circadian sleep/wake cycle, sleep)|GO:0050830(defense response to Gra…	11.579	10.6255
PGM5	phosphoglucomutase 5	GO:0000287(magnesium ion binding)|GO:0001725(stress fiber)|GO:0004614(phosphoglucomutase activity)|GO:0005198(structural molecule activity)|GO:0005515(protein binding)|GO:0005914(spot adherens junction)|GO:0005925(focal adhesion)|GO:0005975(carbohydrate metabolic process)|GO:0006006(glucose metabolic process)|GO:0007155(cell adhesion)|GO:0008150(biological_process)|GO:0009898(internal side of pla…	2.12217	2.12606
PGS1	phosphatidylglycerophosphate synthase 1	GO:0000166(nucleotide binding)|GO:0005524(ATP binding)|GO:0005739(mitochondrion)|GO:0005783(endoplasmic reticulum)|GO:0008152(metabolic process)|GO:0008444(CDP-diacylglycerol-glycerol-3-phosphate 3-phosphatidyltransferase activity)|GO:0008654(phospholipid biosynthetic process)|GO:0016740(transferase activity)|GO:0016780(phosphotransferase activity, for other substituted phosphate groups)	2.21835	2.34094
PHLDA1	pleckstrin homology-like domain, family A, member 1	GO:0005515(protein binding)|GO:0005634(nucleus)|GO:0005730(nucleolus)|GO:0005737(cytoplasm)|GO:0006915(apoptosis)|GO:0006917(induction of apoptosis)|GO:0016020(membrane)|GO:0030659(cytoplasmic vesicle membrane)|GO:0031410(cytoplasmic vesicle)|GO:0045210(FasL biosynthetic process)	0.474637	0.467526
PHLDB2	pleckstrin homology-like domain, family B, member 2	GO:0005737(cytoplasm)|GO:0016020(membrane)|GO:0019898(extrinsic to membrane)	0.458979	0.492026
PI3	peptidase inhibitor 3, skin-derived	GO:0004867(serine-type endopeptidase inhibitor activity)|GO:0005515(protein binding)|GO:0005576(extracellular region)|GO:0005578(proteinaceous extracellular matrix)|GO:0007620(copulation)	3.90283	3.55009
PIP5K1C	phosphatidylinositol-4-phosphate 5-kinase, type I, gamma	GO:0000166(nucleotide binding)|GO:0005524(ATP binding)|GO:0005886(plasma membrane)|GO:0007409(axonogenesis)|GO:0016301(kinase activity)|GO:0016308(1-phosphatidylinositol-4-phosphate 5-kinase activity)|GO:0016740(transferase activity)|GO:0046488(phosphatidylinositol metabolic process)	2.13526	2.24908
PKP2	plakophilin 2	GO:0005515(protein binding)|GO:0005634(nucleus)|GO:0005856(cytoskeleton)|GO:0005886(plasma membrane)|GO:0005912(adherens junction)|GO:0007507(heart development)|GO:0016021(integral to membrane)|GO:0016337(cell-cell adhesion)|GO:0030057(desmosome)	2.1443	2.31136
PLAU	plasminogen activator, urokinase	GO:0001525(angiogenesis)|GO:0001666(response to hypoxia)|GO:0004252(serine-type endopeptidase activity)|GO:0005576(extracellular region)|GO:0005886(plasma membrane)|GO:0006508(proteolysis)|GO:0006935(chemotaxis)|GO:0007165(signal transduction)|GO:0007566(embryo implantation)|GO:0007596(blood coagulation)|GO:0008233(peptidase activity)|GO:0014909(smooth muscle cell migration)|GO:0042127(regulation…	2.4172	2.17939
PLAUR	plasminogen activator, urokinase receptor	GO:0005576(extracellular region)|GO:0005886(plasma membrane)|GO:0006928(cell motion)|GO:0006935(chemotaxis)|GO:0007165(signal transduction)|GO:0007596(blood coagulation)|GO:0009986(cell surface)|GO:0016021(integral to membrane)|GO:0016255(attachment of GPI anchor to protein)|GO:0019898(extrinsic to membrane)|GO:0019899(enzyme binding)|GO:0030162(regulation of proteolysis)|GO:0030377(U-plasminogen…	2.83413	2.46932
PLB1	phospholipase B1	GO:0004622(lysophospholipase activity)|GO:0004623(phospholipase A2 activity)|GO:0005886(plasma membrane)|GO:0016021(integral to membrane)|GO:0016042(lipid catabolic process)|GO:0016298(lipase activity)	2.42205	2.12704
PLCXD2	phosphatidylinositol-specific phospholipase C, X domain containing 2	GO:0004629(phospholipase C activity)|GO:0004871(signal transducer activity)|GO:0007242(intracellular signaling cascade)|GO:0016042(lipid catabolic process)|GO:0016787(hydrolase activity)	3.04304	3.83731
PLEK2	pleckstrin 2	GO:0005737(cytoplasm)|GO:0005856(cytoskeleton)|GO:0005886(plasma membrane)|GO:0007242(intracellular signaling cascade)|GO:0019898(extrinsic to membrane)|GO:0030036(actin cytoskeleton organization)|GO:0042995(cell projection)	2.22283	2.22112
PLEKHA5	pleckstrin homology domain containing, family A member 5	GO:0005515(protein binding)|GO:0005545(phosphatidylinositol binding)|GO:0005575(cellular_component)|GO:0008150(biological_process)	0.496267	0.433038
PLEKHG1	pleckstrin homology domain containing, family G (with RhoGef domain) member 1	GO:0005085(guanyl-nucleotide exchange factor activity)|GO:0005089(Rho guanyl-nucleotide exchange factor activity)|GO:0005622(intracellular)|GO:0035023(regulation of Rho protein signal transduction)	0.488485	0.487086
PLIN4	perilipin 4	GO:0005737(cytoplasm)|GO:0005886(plasma membrane)|GO:0012511(monolayer-surrounded lipid storage body)	2.40918	2.07264
PLIN5	perilipin 5	GO:0012511(monolayer-surrounded lipid storage body)	3.27551	2.66599
PLOD2	procollagen-lysine, 2-oxoglutarate 5-dioxygenase 2	GO:0001666(response to hypoxia)|GO:0005506(iron ion binding)|GO:0005515(protein binding)|GO:0005783(endoplasmic reticulum)|GO:0006464(protein modification process)|GO:0008475(procollagen-lysine 5-dioxygenase activity)|GO:0016020(membrane)|GO:0016702(oxidoreductase activity, acting on single donors with incorporation of molecular oxygen, incorporation of two atoms of oxygen)|GO:0016705(oxidoreduct…	2.46025	2.48234
PLSCR1	phospholipid scramblase 1	GO:0005509(calcium ion binding)|GO:0005515(protein binding)|GO:0005886(plasma membrane)|GO:0009615(response to virus)|GO:0016021(integral to membrane)|GO:0017121(phospholipid scrambling)|GO:0017124(SH3 domain binding)|GO:0017128(phospholipid scramblase activity)|GO:0030168(platelet activation)	2.9926	2.65891
PLXNA1	plexin A1	GO:0004872(receptor activity)|GO:0005515(protein binding)|GO:0005575(cellular_component)|GO:0005622(intracellular)|GO:0005624(membrane fraction)|GO:0005886(plasma membrane)|GO:0007165(signal transduction)|GO:0007275(multicellular organismal development)|GO:0016021(integral to membrane)|GO:0017154(semaphorin receptor activity)	0.477213	0.475065
PLXNC1	plexin C1	GO:0004872(receptor activity)|GO:0005102(receptor binding)|GO:0005622(intracellular)|GO:0005886(plasma membrane)|GO:0007155(cell adhesion)|GO:0007165(signal transduction)|GO:0007275(multicellular organismal development)|GO:0016021(integral to membrane)	2.53623	2.79745
PMEPA1	prostate transmembrane protein, androgen induced 1	GO:0003674(molecular_function)|GO:0005515(protein binding)|GO:0005886(plasma membrane)|GO:0016021(integral to membrane)|GO:0030521(androgen receptor signaling pathway)|GO:0050699(WW domain binding)	0.359349	0.328781
POF1B	premature ovarian failure, 1B	GO:0003779(actin binding)	3.41834	2.59106
POLD4	polymerase (DNA-directed), delta 4	GO:0001938(positive regulation of endothelial cell proliferation)|GO:0003887(DNA-directed DNA polymerase activity)|GO:0005515(protein binding)|GO:0005634(nucleus)|GO:0005654(nucleoplasm)|GO:0006261(DNA-dependent DNA replication)|GO:0006297(nucleotide-excision repair, DNA gap filling)|GO:0016740(transferase activity)|GO:0016779(nucleotidyltransferase activity)	2.05948	2.10808
POM121L1P	POM121 membrane glycoprotein-like 1 (rat) pseudogene		2.22411	2.75285
POM121L4P	POM121 membrane glycoprotein-like 4 pseudogene (rat)		3.01466	2.75111
POU2AF1	POU class 2 associating factor 1	GO:0003677(DNA binding)|GO:0003713(transcription coactivator activity)|GO:0005515(protein binding)|GO:0005634(nucleus)|GO:0006366(transcription from RNA polymerase II promoter)|GO:0006959(humoral immune response)|GO:0045449(regulation of transcription)	0.423397	0.375611
PPFIBP1	PTPRF interacting protein, binding protein 1 (liprin beta 1)	GO:0005515(protein binding)|GO:0005886(plasma membrane)|GO:0007155(cell adhesion)	0.474075	0.325883
PPIL4	peptidylprolyl isomerase (cyclophilin)-like 4	GO:0000166(nucleotide binding)|GO:0003723(RNA binding)|GO:0003755(peptidyl-prolyl cis-trans isomerase activity)|GO:0005634(nucleus)|GO:0006457(protein folding)|GO:0016853(isomerase activity)	0.451861	0.440336
PPP1R3B	protein phosphatase 1, regulatory (inhibitor) subunit 3B	GO:0005975(carbohydrate metabolic process)|GO:0005977(glycogen metabolic process)	3.6454	2.89368
PPP1R3D	protein phosphatase 1, regulatory (inhibitor) subunit 3D	GO:0004722(protein serine/threonine phosphatase activity)|GO:0005515(protein binding)|GO:0005975(carbohydrate metabolic process)|GO:0005977(glycogen metabolic process)	2.10986	2.24279
PPP1R9A	protein phosphatase 1, regulatory (inhibitor) subunit 9A	GO:0003779(actin binding)|GO:0005515(protein binding)|GO:0005737(cytoplasm)|GO:0005856(cytoskeleton)|GO:0007275(multicellular organismal development)|GO:0007399(nervous system development)|GO:0019717(synaptosome)|GO:0030054(cell junction)|GO:0030154(cell differentiation)|GO:0045202(synapse)	0.414139	0.403925
PRB4	proline-rich protein BstNI subfamily 4	GO:0003674(molecular_function)|GO:0005576(extracellular region)|GO:0008150(biological_process)	2.17251	2.40867
PRDM5	PR domain containing 5	GO:0000278(mitotic cell cycle)|GO:0005622(intracellular)|GO:0005634(nucleus)|GO:0008270(zinc ion binding)|GO:0010843(promoter binding)|GO:0016566(specific transcriptional repressor activity)|GO:0016568(chromatin modification)|GO:0016575(histone deacetylation)|GO:0045449(regulation of transcription)|GO:0046872(metal ion binding)|GO:0051567(histone H3-K9 methylation)|GO:0070491(transcription repres…	3.12462	2.30556
PRG3	proteoglycan 3	GO:0001694(histamine biosynthetic process)|GO:0005488(binding)|GO:0005529(sugar binding)|GO:0006955(immune response)|GO:0017148(negative regulation of translation)|GO:0019370(leukotriene biosynthetic process)|GO:0042119(neutrophil activation)|GO:0042554(superoxide anion generation)|GO:0045416(positive regulation of interleukin-8 biosynthetic process)|GO:0045575(basophil activation)	2.1718	2.0232
PRKCDBP	protein kinase C, delta binding protein	GO:0005080(protein kinase C binding)	2.3214	2.26697
PRKCZ	protein kinase C, zeta	GO:0000166(nucleotide binding)|GO:0000226(microtubule cytoskeleton organization)|GO:0001954(positive regulation of cell-matrix adhesion)|GO:0004697(protein kinase C activity)|GO:0005524(ATP binding)|GO:0005624(membrane fraction)|GO:0005737(cytoplasm)|GO:0005768(endosome)|GO:0005792(microsome)|GO:0005829(cytosol)|GO:0005886(plasma membrane)|GO:0005923(tight junction)|GO:0005938(cell cortex)|GO:000…	0.367564	0.389466
PRKG1	protein kinase, cGMP-dependent, type I	GO:0000166(nucleotide binding)|GO:0001764(neuron migration)|GO:0004674(protein serine/threonine kinase activity)|GO:0004692(cGMP-dependent protein kinase activity)|GO:0005515(protein binding)|GO:0005524(ATP binding)|GO:0005794(Golgi apparatus)|GO:0006468(protein amino acid phosphorylation)|GO:0007165(signal transduction)|GO:0016358(dendrite development)|GO:0016740(transferase activity)|GO:0030036…	2.20121	2.05944
PRM2	protamine 2	GO:0000786(nucleosome)|GO:0003677(DNA binding)|GO:0005634(nucleus)|GO:0005654(nucleoplasm)|GO:0005694(chromosome)|GO:0007275(multicellular organismal development)|GO:0007283(spermatogenesis)|GO:0030154(cell differentiation)|GO:0030261(chromosome condensation)	2.01094	2.01951
PROK2	prokineticin 2	GO:0000187(activation of MAPK activity)|GO:0001525(angiogenesis)|GO:0001664(G-protein-coupled receptor binding)|GO:0005576(extracellular region)|GO:0006916(anti-apoptosis)|GO:0006935(chemotaxis)|GO:0006954(inflammatory response)|GO:0007204(elevation of cytosolic calcium ion concentration)|GO:0007218(neuropeptide signaling pathway)|GO:0007283(spermatogenesis)|GO:0007623(circadian rhythm)|GO:000828…	3.77259	3.69516
PROKR1	prokineticin receptor 1	GO:0004872(receptor activity)|GO:0004930(G-protein coupled receptor activity)|GO:0004983(neuropeptide Y receptor activity)|GO:0005886(plasma membrane)|GO:0007165(signal transduction)|GO:0007186(G-protein coupled receptor protein signaling pathway)|GO:0016021(integral to membrane)	2.11712	2.22977
PROS1	protein S (alpha)	GO:0004866(endopeptidase inhibitor activity)|GO:0005509(calcium ion binding)|GO:0005576(extracellular region)|GO:0007596(blood coagulation)|GO:0031093(platelet alpha granule lumen)	2.09528	2.39821
PRR24	proline rich 24		3.05506	3.47867
PRR7	proline rich 7 (synaptic)	GO:0005886(plasma membrane)|GO:0016021(integral to membrane)|GO:0030054(cell junction)|GO:0045202(synapse)|GO:0045211(postsynaptic membrane)	2.3083	2.70032
PRSS2	protease, serine, 2 (trypsin 2)	GO:0004252(serine-type endopeptidase activity)|GO:0005509(calcium ion binding)|GO:0005515(protein binding)|GO:0005576(extracellular region)|GO:0005615(extracellular space)|GO:0006508(proteolysis)|GO:0007586(digestion)|GO:0008233(peptidase activity)|GO:0030307(positive regulation of cell growth)|GO:0030574(collagen catabolic process)|GO:0031012(extracellular matrix)|GO:0045785(positive regulation …	2.07963	2.05522
PRSS33	protease, serine, 33	GO:0004252(serine-type endopeptidase activity)|GO:0005576(extracellular region)|GO:0006508(proteolysis)|GO:0008233(peptidase activity)	2.04682	2.19572
PRTN3	proteinase 3	GO:0004252(serine-type endopeptidase activity)|GO:0005515(protein binding)|GO:0005575(cellular_component)|GO:0006508(proteolysis)|GO:0008233(peptidase activity)|GO:0008284(positive regulation of cell proliferation)|GO:0030574(collagen catabolic process)	3.73624	3.01103
PSG5	pregnancy specific beta-1-glycoprotein 5	GO:0005576(extracellular region)|GO:0007565(female pregnancy)	2.84319	3.14963
PSG9	pregnancy specific beta-1-glycoprotein 9	GO:0005576(extracellular region)|GO:0007565(female pregnancy)	2.95826	3.33406
PTGFR	prostaglandin F receptor (FP)	GO:0004872(receptor activity)|GO:0004930(G-protein coupled receptor activity)|GO:0004958(prostaglandin F receptor activity)|GO:0005886(plasma membrane)|GO:0005887(integral to plasma membrane)|GO:0007165(signal transduction)|GO:0007186(G-protein coupled receptor protein signaling pathway)|GO:0007567(parturition)	2.63027	2.96801
PTPN14	protein tyrosine phosphatase, non-receptor type 14	GO:0004725(protein tyrosine phosphatase activity)|GO:0005488(binding)|GO:0005737(cytoplasm)|GO:0005856(cytoskeleton)|GO:0006470(protein amino acid dephosphorylation)|GO:0016787(hydrolase activity)	2.891	2.25981
PTPRO	protein tyrosine phosphatase, receptor type, O	GO:0004872(receptor activity)|GO:0005001(transmembrane receptor protein tyrosine phosphatase activity)|GO:0005515(protein binding)|GO:0005887(integral to plasma membrane)|GO:0006470(protein amino acid dephosphorylation)|GO:0016020(membrane)|GO:0016787(hydrolase activity)	2.10441	2.52821
PTPRZ1	protein tyrosine phosphatase, receptor-type, Z polypeptide 1	GO:0005001(transmembrane receptor protein tyrosine phosphatase activity)|GO:0005515(protein binding)|GO:0005575(cellular_component)|GO:0005578(proteinaceous extracellular matrix)|GO:0005887(integral to plasma membrane)|GO:0006470(protein amino acid dephosphorylation)|GO:0007409(axonogenesis)|GO:0007417(central nervous system development)|GO:0008150(biological_process)|GO:0008330(protein tyrosine/…	2.84694	2.64661
PTX3	pentraxin-related gene, rapidly induced by IL-1 beta	GO:0001872(zymosan binding)|GO:0001878(response to yeast)|GO:0005576(extracellular region)|GO:0006954(inflammatory response)|GO:0008228(opsonization)|GO:0045429(positive regulation of nitric oxide biosynthetic process)|GO:0050766(positive regulation of phagocytosis)	2.88537	2.34152
PVRL2	poliovirus receptor-related 2 (herpesvirus entry mediator B)	GO:0002860(positive regulation of natural killer cell mediated cytotoxicity directed against tumor cell target)|GO:0002891(positive regulation of immunoglobulin mediated immune response)|GO:0005886(plasma membrane)|GO:0005911(cell-cell junction)|GO:0005915(zonula adherens)|GO:0007155(cell adhesion)|GO:0007156(homophilic cell adhesion)|GO:0007286(spermatid development)|GO:0009986(cell surface)|GO:…	2.48377	2.33776
PVRL3	poliovirus receptor-related 3	GO:0002089(lens morphogenesis in camera-type eye)|GO:0005886(plasma membrane)|GO:0005913(cell-cell adherens junction)|GO:0007156(homophilic cell adhesion)|GO:0009566(fertilization)|GO:0016021(integral to membrane)|GO:0042803(protein homodimerization activity)|GO:0043296(apical junction complex)|GO:0050839(cell adhesion molecule binding)|GO:0060042(retina morphogenesis in camera-type eye)	0.484152	0.490421
PYGL	phosphorylase, glycogen, liver	GO:0000166(nucleotide binding)|GO:0002060(purine binding)|GO:0005524(ATP binding)|GO:0005529(sugar binding)|GO:0005536(glucose binding)|GO:0005625(soluble fraction)|GO:0005737(cytoplasm)|GO:0005975(carbohydrate metabolic process)|GO:0005980(glycogen catabolic process)|GO:0006015(5-phosphoribose 1-diphosphate biosynthetic process)|GO:0008144(drug binding)|GO:0008184(glycogen phosphorylase activity…	2.81036	2.13495
QPCT	glutaminyl-peptide cyclotransferase	GO:0006464(protein modification process)|GO:0006508(proteolysis)|GO:0008233(peptidase activity)|GO:0008270(zinc ion binding)|GO:0008415(acyltransferase activity)|GO:0016603(glutaminyl-peptide cyclotransferase activity)|GO:0016740(transferase activity)|GO:0046872(metal ion binding)	3.72994	3.22945
RAB20	RAB20, member RAS oncogene family	GO:0000166(nucleotide binding)|GO:0005525(GTP binding)|GO:0005794(Golgi apparatus)|GO:0007264(small GTPase mediated signal transduction)|GO:0015031(protein transport)	2.43892	2.21194
RAI1	retinoic acid induced 1	GO:0005515(protein binding)|GO:0005634(nucleus)|GO:0005737(cytoplasm)|GO:0008270(zinc ion binding)|GO:0046872(metal ion binding)	2.4806	2.21201
RALB	v-ral simian leukemia viral oncogene homolog B (ras related; GTP binding protein)	GO:0000166(nucleotide binding)|GO:0003924(GTPase activity)|GO:0005515(protein binding)|GO:0005525(GTP binding)|GO:0005622(intracellular)|GO:0005886(plasma membrane)|GO:0007265(Ras protein signal transduction)	3.7932	2.88059
RASAL1	RAS protein activator like 1 (GAP1 like)	GO:0005099(Ras GTPase activator activity)|GO:0005543(phospholipid binding)|GO:0005622(intracellular)|GO:0007242(intracellular signaling cascade)|GO:0008270(zinc ion binding)|GO:0046872(metal ion binding)|GO:0051056(regulation of small GTPase mediated signal transduction)	2.01835	2.02453
RASGRP4	RAS guanyl releasing protein 4	GO:0005088(Ras guanyl-nucleotide exchange factor activity)|GO:0005509(calcium ion binding)|GO:0005622(intracellular)|GO:0005624(membrane fraction)|GO:0005625(soluble fraction)|GO:0005737(cytoplasm)|GO:0005886(plasma membrane)|GO:0007169(transmembrane receptor protein tyrosine kinase signaling pathway)|GO:0007202(activation of phospholipase C activity)|GO:0008270(zinc ion binding)|GO:0008277(regul…	2.45517	2.12827
RAVER1	ribonucleoprotein, PTB-binding 1	GO:0000166(nucleotide binding)|GO:0003723(RNA binding)|GO:0005515(protein binding)|GO:0005634(nucleus)|GO:0005737(cytoplasm)	2.84671	3.07073
RBM47	RNA binding motif protein 47	GO:0003723(RNA binding)|GO:0005634(nucleus)	2.33007	2.31609
RBMXL1	RNA binding motif protein, X-linked-like 1		2.58556	2.35047
RCC1	regulator of chromosome condensation 1	GO:0000082(G1/S transition of mitotic cell cycle)|GO:0000790(nuclear chromatin)|GO:0000794(condensed nuclear chromosome)|GO:0003682(chromatin binding)|GO:0005085(guanyl-nucleotide exchange factor activity)|GO:0005087(Ran guanyl-nucleotide exchange factor activity)|GO:0005634(nucleus)|GO:0005737(cytoplasm)|GO:0007049(cell cycle)|GO:0007052(mitotic spindle organization)|GO:0007088(regulation of mit…	2.02378	2.38578
REN	renin	GO:0001822(kidney development)|GO:0002003(angiotensin maturation)|GO:0002016(regulation of blood volume by renin-angiotensin)|GO:0004190(aspartic-type endopeptidase activity)|GO:0005159(insulin-like growth factor receptor binding)|GO:0005576(extracellular region)|GO:0005615(extracellular space)|GO:0006508(proteolysis)|GO:0008217(regulation of blood pressure)|GO:0008233(peptidase activity)|GO:0009…	3.09645	2.26222
REPS2	RALBP1 associated Eps domain containing 2	GO:0005509(calcium ion binding)|GO:0005515(protein binding)|GO:0005737(cytoplasm)|GO:0006461(protein complex assembly)|GO:0007173(epidermal growth factor receptor signaling pathway)	2.23431	2.19956
RERG	RAS-like, estrogen-regulated, growth inhibitor	GO:0000166(nucleotide binding)|GO:0003924(GTPase activity)|GO:0005525(GTP binding)|GO:0005622(intracellular)|GO:0005634(nucleus)|GO:0005737(cytoplasm)|GO:0005829(cytosol)|GO:0007165(signal transduction)|GO:0007264(small GTPase mediated signal transduction)|GO:0008285(negative regulation of cell proliferation)|GO:0009725(response to hormone stimulus)|GO:0016020(membrane)|GO:0019003(GDP binding)|GO…	2.54093	3.84546
RETN	resistin	GO:0005179(hormone activity)|GO:0005576(extracellular region)|GO:0005615(extracellular space)|GO:0005634(nucleus)|GO:0008150(biological_process)|GO:0032868(response to insulin stimulus)|GO:0045444(fat cell differentiation)	10.1237	8.64662
RGL4	ral guanine nucleotide dissociation stimulator-like 4	GO:0005085(guanyl-nucleotide exchange factor activity)|GO:0005622(intracellular)|GO:0007264(small GTPase mediated signal transduction)|GO:0016023(cytoplasmic membrane-bounded vesicle)	2.5829	2.3973
RGR	retinal G protein coupled receptor	GO:0004930(G-protein coupled receptor activity)|GO:0005515(protein binding)|GO:0005887(integral to plasma membrane)|GO:0007165(signal transduction)|GO:0007186(G-protein coupled receptor protein signaling pathway)|GO:0007601(visual perception)|GO:0007602(phototransduction)|GO:0009881(photoreceptor activity)|GO:0016020(membrane)|GO:0018298(protein-chromophore linkage)|GO:0050896(response to stimulu…	2.49669	2.44458
RHAG	Rh-associated glycoprotein	GO:0005886(plasma membrane)|GO:0005887(integral to plasma membrane)|GO:0006873(cellular ion homeostasis)|GO:0008519(ammonium transmembrane transporter activity)|GO:0015670(carbon dioxide transport)|GO:0015696(ammonium transport)|GO:0030506(ankyrin binding)|GO:0051739(ammonia transporter activity)|GO:0055085(transmembrane transport)	4.12149	4.0506
RHCE	Rh blood group, CcEe antigens	GO:0005887(integral to plasma membrane)|GO:0008519(ammonium transmembrane transporter activity)|GO:0016020(membrane)|GO:0055085(transmembrane transport)	3.32838	2.6598
RIC3	resistance to inhibitors of cholinesterase 3 homolog (C. elegans)	GO:0005783(endoplasmic reticulum)|GO:0005794(Golgi apparatus)|GO:0016020(membrane)|GO:0016021(integral to membrane)	0.488444	0.463154
RNASE2	ribonuclease, RNase A family, 2 (liver, eosinophil-derived neurotoxin)	GO:0003676(nucleic acid binding)|GO:0004519(endonuclease activity)|GO:0004522(pancreatic ribonuclease activity)|GO:0004540(ribonuclease activity)|GO:0005576(extracellular region)|GO:0005764(lysosome)|GO:0006401(RNA catabolic process)|GO:0006935(chemotaxis)|GO:0016787(hydrolase activity)	2.84029	2.56158
RNASE3	ribonuclease, RNase A family, 3 (eosinophil cationic protein)	GO:0003676(nucleic acid binding)|GO:0004519(endonuclease activity)|GO:0004522(pancreatic ribonuclease activity)|GO:0004540(ribonuclease activity)|GO:0005576(extracellular region)|GO:0005625(soluble fraction)|GO:0006401(RNA catabolic process)|GO:0016787(hydrolase activity)|GO:0042742(defense response to bacterium)	4.43873	3.36872
RNF149	ring finger protein 149	GO:0005515(protein binding)|GO:0008270(zinc ion binding)|GO:0016020(membrane)|GO:0016021(integral to membrane)|GO:0016874(ligase activity)|GO:0019941(modification-dependent protein catabolic process)|GO:0046872(metal ion binding)	2.108	2.05269
RNF24	ring finger protein 24	GO:0005515(protein binding)|GO:0005794(Golgi apparatus)|GO:0008270(zinc ion binding)|GO:0016020(membrane)|GO:0016021(integral to membrane)|GO:0046872(metal ion binding)	2.78036	2.72379
ROBO3	roundabout, axon guidance receptor, homolog 3 (Drosophila)	GO:0004872(receptor activity)|GO:0006935(chemotaxis)|GO:0007275(multicellular organismal development)|GO:0007399(nervous system development)|GO:0007411(axon guidance)|GO:0016020(membrane)|GO:0016021(integral to membrane)|GO:0030154(cell differentiation)	2.88739	3.14837
ROPN1L	ropporin 1-like	GO:0007165(signal transduction)|GO:0008603(cAMP-dependent protein kinase regulator activity)	3.11103	2.69815
RORC	RAR-related orphan receptor C	GO:0003700(transcription factor activity)|GO:0003707(steroid hormone receptor activity)|GO:0005634(nucleus)|GO:0006355(regulation of transcription, DNA-dependent)|GO:0008270(zinc ion binding)|GO:0043565(sequence-specific DNA binding)|GO:0046872(metal ion binding)	0.469005	0.437863
RP1-21O18.1	kazrin	GO:0005634(nucleus)|GO:0005737(cytoplasm)|GO:0005856(cytoskeleton)|GO:0030054(cell junction)|GO:0030057(desmosome)|GO:0031424(keratinization)	5.22482	5.54041
RP2	retinitis pigmentosa 2 (X-linked recessive)	GO:0004550(nucleoside diphosphate kinase activity)|GO:0005488(binding)|GO:0005524(ATP binding)|GO:0005886(plasma membrane)|GO:0006183(GTP biosynthetic process)|GO:0006228(UTP biosynthetic process)|GO:0006241(CTP biosynthetic process)|GO:0006457(protein folding)|GO:0007601(visual perception)|GO:0050896(response to stimulus)|GO:0051082(unfolded protein binding)	2.50829	2.42227
RPH3A	rabphilin 3A homolog (mouse)	GO:0005215(transporter activity)|GO:0005515(protein binding)|GO:0006886(intracellular protein transport)|GO:0008270(zinc ion binding)|GO:0016020(membrane)|GO:0017137(Rab GTPase binding)|GO:0019898(extrinsic to membrane)|GO:0030054(cell junction)|GO:0030672(synaptic vesicle membrane)|GO:0045202(synapse)|GO:0046872(metal ion binding)	4.34211	3.37679
RRAGD	Ras-related GTP binding D	GO:0000166(nucleotide binding)|GO:0005515(protein binding)|GO:0005525(GTP binding)|GO:0005634(nucleus)|GO:0005737(cytoplasm)|GO:0046982(protein heterodimerization activity)	2.30533	2.05928
RSAD2	radical S-adenosyl methionine domain containing 2	GO:0003824(catalytic activity)|GO:0005506(iron ion binding)|GO:0005783(endoplasmic reticulum)|GO:0005794(Golgi apparatus)|GO:0016020(membrane)|GO:0030278(regulation of ossification)|GO:0046872(metal ion binding)|GO:0051536(iron-sulfur cluster binding)|GO:0051607(defense response to virus)	2.27873	2.67905
RSPO3	R-spondin 3 homolog (Xenopus laevis)	GO:0005576(extracellular region)|GO:0008201(heparin binding)|GO:0016055(Wnt receptor signaling pathway)|GO:0050896(response to stimulus)	2.40788	2.27873
RTKN2	rhotekin 2	GO:0005622(intracellular)|GO:0005886(plasma membrane)|GO:0007165(signal transduction)|GO:0008284(positive regulation of cell proliferation)|GO:0030097(hemopoiesis)	0.409052	0.420523
RTN3	reticulon 3	GO:0005515(protein binding)|GO:0005615(extracellular space)|GO:0005634(nucleus)|GO:0005730(nucleolus)|GO:0005783(endoplasmic reticulum)|GO:0005794(Golgi apparatus)|GO:0006915(apoptosis)|GO:0006950(response to stress)|GO:0016020(membrane)|GO:0016021(integral to membrane)|GO:0016192(vesicle-mediated transport)|GO:0044419(interspecies interaction between organisms)	2.89518	2.51203
RUNDC2B	RUN domain containing 2B		2.40679	2.50836
S100A11	S100 calcium binding protein A11	GO:0001726(ruffle)|GO:0005509(calcium ion binding)|GO:0005634(nucleus)|GO:0005737(cytoplasm)|GO:0007165(signal transduction)|GO:0008156(negative regulation of DNA replication)|GO:0008285(negative regulation of cell proliferation)|GO:0042803(protein homodimerization activity)|GO:0048154(S100 beta binding)|GO:0048306(calcium-dependent protein binding)	2.01952	2.20685
S100A12	S100 calcium binding protein A12	GO:0005509(calcium ion binding)|GO:0005626(insoluble fraction)|GO:0005634(nucleus)|GO:0005730(nucleolus)|GO:0005737(cytoplasm)|GO:0005829(cytosol)|GO:0005886(plasma membrane)|GO:0006805(xenobiotic metabolic process)|GO:0006954(inflammatory response)|GO:0008270(zinc ion binding)|GO:0031640(killing of cells of another organism)|GO:0042742(defense response to bacterium)|GO:0050832(defense response t…	3.40691	3.17283
S100P	S100 calcium binding protein P	GO:0000287(magnesium ion binding)|GO:0005509(calcium ion binding)|GO:0005634(nucleus)|GO:0005737(cytoplasm)|GO:0043542(endothelial cell migration)|GO:0048306(calcium-dependent protein binding)	3.70486	3.44833
SAMD4B	sterile alpha motif domain containing 4B	GO:0005515(protein binding)	2.10943	2.34953
SAPS1	SAPS domain family, member 1	GO:0005515(protein binding)|GO:0005737(cytoplasm)	2.36941	2.80552
SCARB1	scavenger receptor class B, member 1	GO:0000299(integral to membrane of membrane fraction)|GO:0001786(phosphatidylserine binding)|GO:0001875(lipopolysaccharide receptor activity)|GO:0001935(endothelial cell proliferation)|GO:0004872(receptor activity)|GO:0005215(transporter activity)|GO:0005545(phosphatidylinositol binding)|GO:0005737(cytoplasm)|GO:0005886(plasma membrane)|GO:0005887(integral to plasma membrane)|GO:0005901(caveola)|…	2.04045	2.25065
SCD5	stearoyl-CoA desaturase 5	GO:0004768(stearoyl-CoA 9-desaturase activity)|GO:0005506(iron ion binding)|GO:0005783(endoplasmic reticulum)|GO:0006633(fatty acid biosynthetic process)|GO:0016020(membrane)|GO:0016021(integral to membrane)|GO:0016491(oxidoreductase activity)|GO:0046872(metal ion binding)|GO:0055114(oxidation reduction)	0.431323	0.366185
SECTM1	secreted and transmembrane 1	GO:0004871(signal transducer activity)|GO:0005125(cytokine activity)|GO:0005576(extracellular region)|GO:0005615(extracellular space)|GO:0005794(Golgi apparatus)|GO:0005886(plasma membrane)|GO:0006955(immune response)|GO:0007498(mesoderm development)|GO:0016021(integral to membrane)|GO:0043123(positive regulation of I-kappaB kinase/NF-kappaB cascade)	3.34272	2.85791
SELENBP1	selenium binding protein 1	GO:0005634(nucleus)|GO:0005737(cytoplasm)|GO:0005829(cytosol)|GO:0008430(selenium binding)|GO:0015031(protein transport)|GO:0016020(membrane)|GO:0019898(extrinsic to membrane)	4.5968	5.04563
SEMA3F	sema domain, immunoglobulin domain (Ig), short basic domain, secreted, (semaphorin) 3F	GO:0001755(neural crest cell migration)|GO:0004872(receptor activity)|GO:0005576(extracellular region)|GO:0005615(extracellular space)|GO:0007275(multicellular organismal development)|GO:0016020(membrane)|GO:0045499(chemorepellent activity)|GO:0048843(negative regulation of axon extension involved in axon guidance)|GO:0050919(negative chemotaxis)	2.3846	2.48566
SEPT14	septin 14	GO:0000166(nucleotide binding)|GO:0005515(protein binding)|GO:0005525(GTP binding)|GO:0007049(cell cycle)|GO:0031105(septin complex)|GO:0051301(cell division)	2.56218	2.5396
SEPX1	selenoprotein X, 1	GO:0005575(cellular_component)|GO:0005634(nucleus)|GO:0005737(cytoplasm)|GO:0008113(peptide-methionine-(S)-S-oxide reductase activity)|GO:0008270(zinc ion binding)|GO:0008430(selenium binding)|GO:0016491(oxidoreductase activity)|GO:0030091(protein repair)|GO:0046872(metal ion binding)|GO:0055114(oxidation reduction)	3.07843	3.01778
SERPINB10	serpin peptidase inhibitor, clade B (ovalbumin), member 10	GO:0004867(serine-type endopeptidase inhibitor activity)|GO:0005515(protein binding)|GO:0005634(nucleus)|GO:0005737(cytoplasm)|GO:0030414(peptidase inhibitor activity)|GO:0045861(negative regulation of proteolysis)	7.25037	6.39601
SERPING1	serpin peptidase inhibitor, clade G (C1 inhibitor), member 1	GO:0001869(negative regulation of complement activation, lectin pathway)|GO:0004867(serine-type endopeptidase inhibitor activity)|GO:0005515(protein binding)|GO:0005576(extracellular region)|GO:0006958(complement activation, classical pathway)|GO:0007596(blood coagulation)|GO:0008015(blood circulation)|GO:0030414(peptidase inhibitor activity)|GO:0031093(platelet alpha granule lumen)|GO:0045087(in…	3.43967	2.96545
SESN3	sestrin 3	GO:0005634(nucleus)|GO:0007050(cell cycle arrest)	2.28599	2.34914
SFRP2	secreted frizzled-related protein 2	GO:0001756(somitogenesis)|GO:0005515(protein binding)|GO:0005576(extracellular region)|GO:0007275(multicellular organismal development)|GO:0016055(Wnt receptor signaling pathway)|GO:0030154(cell differentiation)|GO:0031668(cellular response to extracellular stimulus)	3.70461	3.88531
SFRS16	splicing factor, arginine/serine-rich 16	GO:0005634(nucleus)|GO:0006397(mRNA processing)|GO:0008380(RNA splicing)	2.27109	2.25687
SFTPA1	surfactant protein A1	GO:0005319(lipid transporter activity)|GO:0005488(binding)|GO:0005509(calcium ion binding)|GO:0005529(sugar binding)|GO:0005576(extracellular region)|GO:0005578(proteinaceous extracellular matrix)|GO:0005615(extracellular space)|GO:0007585(respiratory gaseous exchange)	2.03801	2.11728
SFTPC	surfactant protein C	GO:0005576(extracellular region)|GO:0005615(extracellular space)|GO:0005737(cytoplasm)|GO:0007585(respiratory gaseous exchange)	2.19077	2.22569
SH2D4B	SH2 domain containing 4B	GO:0005515(protein binding)	2.30838	2.20998
SH3GLB1	SH3-domain GRB2-like endophilin B1	GO:0005515(protein binding)|GO:0005634(nucleus)|GO:0005737(cytoplasm)|GO:0005739(mitochondrion)|GO:0005741(mitochondrial outer membrane)|GO:0005794(Golgi apparatus)|GO:0006915(apoptosis)|GO:0006916(anti-apoptosis)|GO:0008289(lipid binding)|GO:0016020(membrane)|GO:0019898(extrinsic to membrane)|GO:0042803(protein homodimerization activity)	2.47909	2.22688
SH3PXD2A	SH3 and PX domains 2A	GO:0002102(podosome)|GO:0005515(protein binding)|GO:0005737(cytoplasm)|GO:0007154(cell communication)|GO:0035091(phosphoinositide binding)|GO:0042995(cell projection)	0.347967	0.462508
SHISA7	shisa homolog 7 (Xenopus laevis)	GO:0016020(membrane)|GO:0016021(integral to membrane)	2.52152	2.56589
SIAH2	seven in absentia homolog 2 (Drosophila)	GO:0003714(transcription corepressor activity)|GO:0004842(ubiquitin-protein ligase activity)|GO:0005515(protein binding)|GO:0005634(nucleus)|GO:0005737(cytoplasm)|GO:0006511(ubiquitin-dependent protein catabolic process)|GO:0006915(apoptosis)|GO:0007049(cell cycle)|GO:0007264(small GTPase mediated signal transduction)|GO:0007275(multicellular organismal development)|GO:0008270(zinc ion binding)|G…	2.06804	2.11903
SIGLEC11	sialic acid binding Ig-like lectin 11	GO:0005515(protein binding)|GO:0005529(sugar binding)|GO:0007155(cell adhesion)|GO:0016020(membrane)|GO:0016021(integral to membrane)	2.12387	2.86
SIGLEC5	sialic acid binding Ig-like lectin 5	GO:0005515(protein binding)|GO:0005529(sugar binding)|GO:0005783(endoplasmic reticulum)|GO:0007155(cell adhesion)|GO:0016020(membrane)|GO:0016021(integral to membrane)	2.86247	2.95915
SIK1	salt-inducible kinase 1	GO:0000122(negative regulation of transcription from RNA polymerase II promoter)|GO:0000166(nucleotide binding)|GO:0000287(magnesium ion binding)|GO:0004674(protein serine/threonine kinase activity)|GO:0005515(protein binding)|GO:0005524(ATP binding)|GO:0005634(nucleus)|GO:0005737(cytoplasm)|GO:0005829(cytosol)|GO:0006468(protein amino acid phosphorylation)|GO:0007049(cell cycle)|GO:0007243(prote…	2.25656	2.56155
SIPA1L2	signal-induced proliferation-associated 1 like 2	GO:0005096(GTPase activator activity)|GO:0005515(protein binding)|GO:0005622(intracellular)|GO:0051056(regulation of small GTPase mediated signal transduction)	3.64699	3.04827
SIRPA	signal-regulatory protein alpha	GO:0005886(plasma membrane)|GO:0007155(cell adhesion)|GO:0016021(integral to membrane)|GO:0017124(SH3 domain binding)	2.21244	2.21332
SIRPB1	signal-regulatory protein beta 1	GO:0005887(integral to plasma membrane)|GO:0007166(cell surface receptor linked signal transduction)|GO:0016020(membrane)|GO:0016021(integral to membrane)	2.36861	2.32256
SIRPD	signal-regulatory protein delta		2.62461	2.44368
SLC11A1	solute carrier family 11 (proton-coupled divalent metal ion transporters), member 1	GO:0000060(protein import into nucleus, translocation)|GO:0001818(negative regulation of cytokine production)|GO:0002309(T cell proliferation during immune response)|GO:0002369(T cell cytokine production)|GO:0002606(positive regulation of dendritic cell antigen processing and presentation)|GO:0002827(positive regulation of T-helper 1 type immune response)|GO:0005215(transporter activity)|GO:00053…	2.90014	2.6877
SLC14A2	solute carrier family 14 (urea transporter), member 2	GO:0005515(protein binding)|GO:0005624(membrane fraction)|GO:0005886(plasma membrane)|GO:0006810(transport)|GO:0009414(response to water deprivation)|GO:0015204(urea transmembrane transporter activity)|GO:0015840(urea transport)|GO:0016021(integral to membrane)	2.57792	2.60058
SLC19A1	solute carrier family 19 (folate transporter), member 1	GO:0005542(folic acid binding)|GO:0005624(membrane fraction)|GO:0005887(integral to plasma membrane)|GO:0006810(transport)|GO:0008517(folic acid transporter activity)|GO:0008518(reduced folate carrier activity)|GO:0015350(methotrexate transporter activity)|GO:0015884(folic acid transport)|GO:0016020(membrane)	2.36347	2.04796
SLC22A15	solute carrier family 22, member 15	GO:0005215(transporter activity)|GO:0006811(ion transport)|GO:0016020(membrane)|GO:0016021(integral to membrane)|GO:0055085(transmembrane transport)	2.32838	2.02804
SLC22A16	solute carrier family 22 (organic cation/carnitine transporter), member 16	GO:0005886(plasma membrane)|GO:0006811(ion transport)|GO:0007275(multicellular organismal development)|GO:0007283(spermatogenesis)|GO:0007338(single fertilization)|GO:0015226(carnitine transporter activity)|GO:0015695(organic cation transport)|GO:0015879(carnitine transport)|GO:0016021(integral to membrane)|GO:0030154(cell differentiation)|GO:0030317(sperm motility)|GO:0046717(acid secretion)|GO:…	2.1277	2.01211
SLC22A23	solute carrier family 22, member 23	GO:0005215(transporter activity)|GO:0006811(ion transport)|GO:0016020(membrane)|GO:0016021(integral to membrane)|GO:0055085(transmembrane transport)	2.35783	2.07221
SLC22A4	solute carrier family 22 (organic cation/ergothioneine transporter), member 4	GO:0000166(nucleotide binding)|GO:0005215(transporter activity)|GO:0005515(protein binding)|GO:0005524(ATP binding)|GO:0005739(mitochondrion)|GO:0005886(plasma membrane)|GO:0005887(integral to plasma membrane)|GO:0006641(triglyceride metabolic process)|GO:0006811(ion transport)|GO:0006814(sodium ion transport)|GO:0007589(body fluid secretion)|GO:0008513(secondary active organic cation transmembra…	4.12906	3.42083
SLC22A7	solute carrier family 22 (organic anion transporter), member 7	GO:0005624(membrane fraction)|GO:0005886(plasma membrane)|GO:0005887(integral to plasma membrane)|GO:0006811(ion transport)|GO:0015075(ion transmembrane transporter activity)|GO:0015347(sodium-independent organic anion transmembrane transporter activity)|GO:0015711(organic anion transport)|GO:0055085(transmembrane transport)	2.76125	2.67589
SLC25A37	solute carrier family 25, member 37	GO:0005381(iron ion transmembrane transporter activity)|GO:0005488(binding)|GO:0005506(iron ion binding)|GO:0005739(mitochondrion)|GO:0005743(mitochondrial inner membrane)|GO:0006811(ion transport)|GO:0016020(membrane)|GO:0016021(integral to membrane)|GO:0048250(mitochondrial iron ion transport)|GO:0055085(transmembrane transport)	2.97611	3.4537
SLC26A10	solute carrier family 26, member 10	GO:0005215(transporter activity)|GO:0015297(antiporter activity)|GO:0016020(membrane)|GO:0016021(integral to membrane)|GO:0031404(chloride ion binding)|GO:0055085(transmembrane transport)	2.29256	2.01808
SLC28A3	solute carrier family 28 (sodium-coupled nucleoside transporter), member 3	GO:0001882(nucleoside binding)|GO:0005886(plasma membrane)|GO:0006810(transport)|GO:0015389(pyrimidine- and adenine-specific:sodium symporter activity)|GO:0015390(purine-specific nucleoside:sodium symporter activity)|GO:0015860(purine nucleoside transport)|GO:0015864(pyrimidine nucleoside transport)|GO:0016021(integral to membrane)	3.23105	2.5238
SLC29A3	solute carrier family 29 (nucleoside transporters), member 3	GO:0005337(nucleoside transmembrane transporter activity)|GO:0005765(lysosomal membrane)|GO:0005768(endosome)|GO:0006810(transport)|GO:0015858(nucleoside transport)|GO:0016020(membrane)|GO:0016021(integral to membrane)|GO:0031902(late endosome membrane)	2.33084	2.66264
SLC2A3	solute carrier family 2 (facilitated glucose transporter), member 3	GO:0005215(transporter activity)|GO:0005355(glucose transmembrane transporter activity)|GO:0005737(cytoplasm)|GO:0005886(plasma membrane)|GO:0005975(carbohydrate metabolic process)|GO:0008643(carbohydrate transport)|GO:0015758(glucose transport)|GO:0016021(integral to membrane)|GO:0022891(substrate-specific transmembrane transporter activity)|GO:0055085(transmembrane transport)	3.11402	2.72023
SLC2A5	solute carrier family 2 (facilitated glucose/fructose transporter), member 5	GO:0005215(transporter activity)|GO:0005353(fructose transmembrane transporter activity)|GO:0005355(glucose transmembrane transporter activity)|GO:0005886(plasma membrane)|GO:0005975(carbohydrate metabolic process)|GO:0008643(carbohydrate transport)|GO:0015755(fructose transport)|GO:0015758(glucose transport)|GO:0016021(integral to membrane)|GO:0022891(substrate-specific transmembrane transporter…	2.84424	2.7303
SLC34A3	solute carrier family 34 (sodium phosphate), member 3	GO:0005436(sodium:phosphate symporter activity)|GO:0005903(brush border)|GO:0006811(ion transport)|GO:0006814(sodium ion transport)|GO:0006817(phosphate transport)|GO:0015293(symporter activity)|GO:0015321(sodium-dependent phosphate transmembrane transporter activity)|GO:0016020(membrane)|GO:0016021(integral to membrane)|GO:0016324(apical plasma membrane)|GO:0030643(cellular phosphate ion homeost…	2.66657	3.14122
SLC47A1	solute carrier family 47, member 1	GO:0005886(plasma membrane)|GO:0006855(multidrug transport)|GO:0015238(drug transporter activity)|GO:0015297(antiporter activity)|GO:0016021(integral to membrane)	2.43768	2.29297
SLC4A1	solute carrier family 4, anion exchanger, member 1 (erythrocyte membrane protein band 3, Diego blood group)	GO:0003779(actin binding)|GO:0005215(transporter activity)|GO:0005452(inorganic anion exchanger activity)|GO:0005887(integral to plasma membrane)|GO:0006820(anion transport)|GO:0006873(cellular ion homeostasis)|GO:0008022(protein C-terminus binding)|GO:0008509(anion transmembrane transporter activity)|GO:0016020(membrane)|GO:0016323(basolateral plasma membrane)|GO:0030018(Z disc)|GO:0030506(ankyr…	2.18732	3.15511
SLC6A10P	solute carrier family 6 (neurotransmitter transporter, creatine), member 10 (pseudogene)		2.26172	2.52968
SLC6A18	solute carrier family 6, member 18	GO:0005328(neurotransmitter:sodium symporter activity)|GO:0005886(plasma membrane)|GO:0005887(integral to plasma membrane)|GO:0006836(neurotransmitter transport)|GO:0006865(amino acid transport)|GO:0015293(symporter activity)	2.42704	2.49259
SLC6A5	solute carrier family 6 (neurotransmitter transporter, glycine), member 5	GO:0005328(neurotransmitter:sodium symporter activity)|GO:0005887(integral to plasma membrane)|GO:0006836(neurotransmitter transport)|GO:0007268(synaptic transmission)|GO:0015293(symporter activity)|GO:0015375(glycine:sodium symporter activity)|GO:0015816(glycine transport)|GO:0016020(membrane)	2.01265	2.00914
SLC6A6	solute carrier family 6 (neurotransmitter transporter, taurine), member 6	GO:0001761(beta-alanine transmembrane transporter activity)|GO:0001762(beta-alanine transport)|GO:0005369(taurine:sodium symporter activity)|GO:0005886(plasma membrane)|GO:0005887(integral to plasma membrane)|GO:0006520(cellular amino acid metabolic process)|GO:0006836(neurotransmitter transport)|GO:0006865(amino acid transport)|GO:0015171(amino acid transmembrane transporter activity)|GO:0015293…	2.38144	2.25309
SLC8A1	solute carrier family 8 (sodium/calcium exchanger), member 1	GO:0001666(response to hypoxia)|GO:0002026(regulation of the force of heart contraction)|GO:0002028(regulation of sodium ion transport)|GO:0005432(calcium:sodium antiporter activity)|GO:0005509(calcium ion binding)|GO:0005516(calmodulin binding)|GO:0005624(membrane fraction)|GO:0005887(integral to plasma membrane)|GO:0005901(caveola)|GO:0006811(ion transport)|GO:0006874(cellular calcium ion homeo…	2.47353	3.13104
SLPI	secretory leukocyte peptidase inhibitor	GO:0004867(serine-type endopeptidase inhibitor activity)|GO:0005576(extracellular region)	5.46662	7.26718
SMPD3	sphingomyelin phosphodiesterase 3, neutral membrane (neutral sphingomyelinase II)	GO:0000137(Golgi cis cisterna)|GO:0000287(magnesium ion binding)|GO:0004767(sphingomyelin phosphodiesterase activity)|GO:0005794(Golgi apparatus)|GO:0005886(plasma membrane)|GO:0006685(sphingomyelin catabolic process)|GO:0007049(cell cycle)|GO:0007275(multicellular organismal development)|GO:0016021(integral to membrane)|GO:0016787(hydrolase activity)|GO:0030072(peptide hormone secretion)	2.34633	2.02372
SMR3A	submaxillary gland androgen regulated protein 3A	GO:0005576(extracellular region)	2.22864	2.56371
SNCA	synuclein, alpha (non A4 component of amyloid precursor)	GO:0000287(magnesium ion binding)|GO:0001774(microglial cell activation)|GO:0001921(positive regulation of receptor recycling)|GO:0001956(positive regulation of neurotransmitter secretion)|GO:0001963(synaptic transmission, dopaminergic)|GO:0004859(phospholipase inhibitor activity)|GO:0005504(fatty acid binding)|GO:0005509(calcium ion binding)|GO:0005634(nucleus)|GO:0005737(cytoplasm)|GO:0005829(c…	3.42749	4.14838
SOCS3	suppressor of cytokine signaling 3	GO:0001666(response to hypoxia)|GO:0001932(regulation of protein amino acid phosphorylation)|GO:0004860(protein kinase inhibitor activity)|GO:0005515(protein binding)|GO:0005737(cytoplasm)|GO:0006916(anti-apoptosis)|GO:0007242(intracellular signaling cascade)|GO:0007259(JAK-STAT cascade)|GO:0007568(aging)|GO:0009408(response to heat)|GO:0009617(response to bacterium)|GO:0010332(response to gamma …	3.99043	4.09811
SORBS1	sorbin and SH3 domain containing 1	GO:0001725(stress fiber)|GO:0003779(actin binding)|GO:0005070(SH3/SH2 adaptor activity)|GO:0005158(insulin receptor binding)|GO:0005634(nucleus)|GO:0005737(cytoplasm)|GO:0005829(cytosol)|GO:0005856(cytoskeleton)|GO:0005886(plasma membrane)|GO:0005899(insulin receptor complex)|GO:0005915(zonula adherens)|GO:0005924(cell-substrate adherens junction)|GO:0006810(transport)|GO:0008286(insulin receptor…	2.19964	2.68809
SP100	SP100 nuclear antigen	GO:0000122(negative regulation of transcription from RNA polymerase II promoter)|GO:0003677(DNA binding)|GO:0003713(transcription coactivator activity)|GO:0003714(transcription corepressor activity)|GO:0005634(nucleus)|GO:0005694(chromosome)|GO:0006978(DNA damage response, signal transduction by p53 class mediator resulting in transcription of p21 class mediator)|GO:0016605(PML body)|GO:0019900(k…	2.19474	2.49621
SP3	Sp3 transcription factor	GO:0001503(ossification)|GO:0001779(natural killer cell differentiation)|GO:0001829(trophectodermal cell differentiation)|GO:0001889(liver development)|GO:0001892(embryonic placenta development)|GO:0003677(DNA binding)|GO:0003682(chromatin binding)|GO:0003690(double-stranded DNA binding)|GO:0005515(protein binding)|GO:0005622(intracellular)|GO:0005634(nucleus)|GO:0006355(regulation of transcripti…	2.09007	2.12857
SPATA2L	spermatogenesis associated 2-like		2.06446	2.11187
SPATS1	spermatogenesis associated, serine-rich 1		3.31905	2.37309
SPEF2	sperm flagellar 2	GO:0046983(protein dimerization activity)	0.381816	0.365927
SPON1	spondin 1, extracellular matrix protein	GO:0005515(protein binding)|GO:0005576(extracellular region)|GO:0005578(proteinaceous extracellular matrix)|GO:0007155(cell adhesion)	0.432013	0.446292
SPOPL	speckle-type POZ protein-like	GO:0005515(protein binding)|GO:0005634(nucleus)|GO:0019941(modification-dependent protein catabolic process)	2.07241	2.0718
SPPL2B	signal peptide peptidase-like 2B	GO:0004190(aspartic-type endopeptidase activity)|GO:0005794(Golgi apparatus)|GO:0008233(peptidase activity)|GO:0016020(membrane)|GO:0016021(integral to membrane)	2.32699	2.61537
SPRY3	sprouty homolog 3 (Drosophila)	GO:0003674(molecular_function)|GO:0005515(protein binding)|GO:0005737(cytoplasm)|GO:0007275(multicellular organismal development)|GO:0009966(regulation of signal transduction)|GO:0016020(membrane)|GO:0019898(extrinsic to membrane)	2.70806	2.57077
SPTA1	spectrin, alpha, erythrocytic 1 (elliptocytosis 2)	GO:0005200(structural constituent of cytoskeleton)|GO:0005509(calcium ion binding)|GO:0005515(protein binding)|GO:0005737(cytoplasm)|GO:0005829(cytosol)|GO:0005938(cell cortex)|GO:0007015(actin filament organization)|GO:0008091(spectrin)|GO:0008360(regulation of cell shape)|GO:0014731(spectrin-associated cytoskeleton)|GO:0015629(actin cytoskeleton)|GO:0016020(membrane)|GO:0030097(hemopoiesis)|GO:…	2.02792	2.14034
SPTB	spectrin, beta, erythrocytic	GO:0005200(structural constituent of cytoskeleton)|GO:0005515(protein binding)|GO:0005737(cytoplasm)|GO:0005829(cytosol)|GO:0005938(cell cortex)|GO:0008091(spectrin)|GO:0014731(spectrin-associated cytoskeleton)|GO:0015629(actin cytoskeleton)|GO:0031235(intrinsic to internal side of plasma membrane)|GO:0043234(protein complex)|GO:0051015(actin filament binding)|GO:0051693(actin filament capping)	2.0482	2.34416
SRGN	serglycin	GO:0005515(protein binding)|GO:0005576(extracellular region)|GO:0005615(extracellular space)|GO:0005794(Golgi apparatus)|GO:0006915(apoptosis)|GO:0030502(negative regulation of bone mineralization)|GO:0031093(platelet alpha granule lumen)|GO:0031214(biomineral formation)|GO:0033364(mast cell secretory granule organization)|GO:0033371(T cell secretory granule organization)|GO:0033373(maintenance o…	2.23569	2.05257
ST3GAL4	ST3 beta-galactoside alpha-2,3-sialyltransferase 4	GO:0003836(beta-galactoside alpha-2,3-sialyltransferase activity)|GO:0005576(extracellular region)|GO:0005794(Golgi apparatus)|GO:0006486(protein amino acid glycosylation)|GO:0016020(membrane)|GO:0016021(integral to membrane)|GO:0030173(integral to Golgi membrane)	2.64993	2.43552
ST3GAL6	ST3 beta-galactoside alpha-2,3-sialyltransferase 6	GO:0005794(Golgi apparatus)|GO:0006040(amino sugar metabolic process)|GO:0006486(protein amino acid glycosylation)|GO:0006664(glycolipid metabolic process)|GO:0008373(sialyltransferase activity)|GO:0009249(protein lipoylation)|GO:0016020(membrane)|GO:0016021(integral to membrane)|GO:0030173(integral to Golgi membrane)	2.34667	2.05373
ST8SIA1	ST8 alpha-N-acetyl-neuraminide alpha-2,8-sialyltransferase 1	GO:0003828(alpha-N-acetylneuraminate alpha-2,8-sialyltransferase activity)|GO:0005794(Golgi apparatus)|GO:0005975(carbohydrate metabolic process)|GO:0006486(protein amino acid glycosylation)|GO:0006629(lipid metabolic process)|GO:0006665(sphingolipid metabolic process)|GO:0006688(glycosphingolipid biosynthetic process)|GO:0008284(positive regulation of cell proliferation)|GO:0016020(membrane)|GO:…	0.451368	0.409055
STAT1	signal transducer and activator of transcription 1, 91kDa	GO:0003700(transcription factor activity)|GO:0004871(signal transducer activity)|GO:0005062(hematopoietin/interferon-class (D200-domain) cytokine receptor signal transducer activity)|GO:0005509(calcium ion binding)|GO:0005515(protein binding)|GO:0005634(nucleus)|GO:0005730(nucleolus)|GO:0005737(cytoplasm)|GO:0006355(regulation of transcription, DNA-dependent)|GO:0006366(transcription from RNA pol…	2.17296	2.47153
STEAP4	STEAP family member 4	GO:0005488(binding)|GO:0005506(iron ion binding)|GO:0005507(copper ion binding)|GO:0005794(Golgi apparatus)|GO:0005886(plasma membrane)|GO:0006811(ion transport)|GO:0006826(iron ion transport)|GO:0009055(electron carrier activity)|GO:0016021(integral to membrane)|GO:0016491(oxidoreductase activity)|GO:0045444(fat cell differentiation)|GO:0046872(metal ion binding)|GO:0050660(FAD binding)|GO:00551…	3.07648	3.53622
STOX2	storkhead box 2		5.67652	4.06804
STRADB	STE20-related kinase adaptor beta	GO:0000166(nucleotide binding)|GO:0000902(cell morphogenesis)|GO:0004672(protein kinase activity)|GO:0005515(protein binding)|GO:0005524(ATP binding)|GO:0005634(nucleus)|GO:0005737(cytoplasm)|GO:0006468(protein amino acid phosphorylation)|GO:0006611(protein export from nucleus)|GO:0006916(anti-apoptosis)|GO:0007049(cell cycle)|GO:0007254(JNK cascade)|GO:0032147(activation of protein kinase activi…	2.09051	2.15475
STX11	syntaxin 11	GO:0005484(SNAP receptor activity)|GO:0005794(Golgi apparatus)|GO:0005886(plasma membrane)|GO:0006886(intracellular protein transport)|GO:0006944(membrane fusion)|GO:0016192(vesicle-mediated transport)|GO:0019898(extrinsic to membrane)	2.7265	2.33831
STX3	syntaxin 3	GO:0001950(plasma membrane enriched fraction)|GO:0005484(SNAP receptor activity)|GO:0005773(vacuole)|GO:0005911(cell-cell junction)|GO:0006836(neurotransmitter transport)|GO:0006886(intracellular protein transport)|GO:0006944(membrane fusion)|GO:0016020(membrane)|GO:0016021(integral to membrane)|GO:0016192(vesicle-mediated transport)|GO:0016324(apical plasma membrane)|GO:0030426(growth cone)|GO:0…	2.78848	2.29189
STXBP6	syntaxin binding protein 6 (amisyn)	GO:0005737(cytoplasm)|GO:0016020(membrane)|GO:0016021(integral to membrane)|GO:0016192(vesicle-mediated transport)|GO:0019898(extrinsic to membrane)	2.0907	3.01304
SUCNR1	succinate receptor 1	GO:0004872(receptor activity)|GO:0004930(G-protein coupled receptor activity)|GO:0005886(plasma membrane)|GO:0007165(signal transduction)|GO:0007186(G-protein coupled receptor protein signaling pathway)|GO:0008150(biological_process)|GO:0016021(integral to membrane)|GO:0045028(purinergic nucleotide receptor activity, G-protein coupled)	2.46216	2.45426
SULT1B1	sulfotransferase family, cytosolic, 1B, member 1	GO:0004062(aryl sulfotransferase activity)|GO:0005737(cytoplasm)|GO:0005829(cytosol)|GO:0006629(lipid metabolic process)|GO:0008202(steroid metabolic process)|GO:0016740(transferase activity)|GO:0018958(phenol metabolic process)|GO:0042403(thyroid hormone metabolic process)	2.89729	2.48236
SUSD4	sushi domain containing 4	GO:0016020(membrane)|GO:0016021(integral to membrane)	0.401004	0.38884
SVEP1	sushi, von Willebrand factor type A, EGF and pentraxin domain containing 1	GO:0003682(chromatin binding)|GO:0005509(calcium ion binding)|GO:0005515(protein binding)|GO:0005576(extracellular region)|GO:0005737(cytoplasm)|GO:0007155(cell adhesion)|GO:0016020(membrane)|GO:0019898(extrinsic to membrane)	2.80091	2.40153
SYNPO	synaptopodin	GO:0003779(actin binding)|GO:0005737(cytoplasm)|GO:0005886(plasma membrane)|GO:0005923(tight junction)|GO:0014069(postsynaptic density)|GO:0015629(actin cytoskeleton)|GO:0030054(cell junction)|GO:0042995(cell projection)|GO:0043197(dendritic spine)|GO:0043204(perikaryon)|GO:0045202(synapse)|GO:0045211(postsynaptic membrane)	2.01883	2.16743
SYT13	synaptotagmin XIII	GO:0005887(integral to plasma membrane)|GO:0016020(membrane)|GO:0016192(vesicle-mediated transport)|GO:0030133(transport vesicle)	2.02569	2.09766
SYT15	synaptotagmin XV	GO:0005886(plasma membrane)|GO:0016021(integral to membrane)	2.03727	0.290037
SYTL2	synaptotagmin-like 2	GO:0001786(phosphatidylserine binding)|GO:0005546(phosphatidylinositol-4,5-bisphosphate binding)|GO:0005624(membrane fraction)|GO:0005737(cytoplasm)|GO:0005886(plasma membrane)|GO:0006886(intracellular protein transport)|GO:0006904(vesicle docking during exocytosis)|GO:0008270(zinc ion binding)|GO:0017137(Rab GTPase binding)|GO:0019897(extrinsic to plasma membrane)|GO:0042043(neurexin binding)|GO…	0.438479	0.421623
TAC4	tachykinin 4 (hemokinin)	GO:0005102(receptor binding)|GO:0005576(extracellular region)|GO:0007217(tachykinin receptor signaling pathway)|GO:0008217(regulation of blood pressure)|GO:0046878(positive regulation of saliva secretion)	2.13633	2.30809
TACSTD2	tumor-associated calcium signal transducer 2	GO:0004872(receptor activity)|GO:0005829(cytosol)|GO:0005886(plasma membrane)|GO:0005887(integral to plasma membrane)|GO:0007166(cell surface receptor linked signal transduction)|GO:0007601(visual perception)|GO:0008283(cell proliferation)|GO:0050896(response to stimulus)	6.77885	7.32184
TAL1	T-cell acute lymphocytic leukemia 1	GO:0000118(histone deacetylase complex)|GO:0003700(transcription factor activity)|GO:0005634(nucleus)|GO:0007275(multicellular organismal development)|GO:0008283(cell proliferation)|GO:0010551(regulation of gene-specific transcription from RNA polymerase II promoter)|GO:0010843(promoter binding)|GO:0030097(hemopoiesis)|GO:0033193(Lsd1/2 complex)|GO:0042826(histone deacetylase binding)|GO:0045165(…	2.27698	2.18708
TALDO1	transaldolase 1	GO:0004801(transaldolase activity)|GO:0005515(protein binding)|GO:0005625(soluble fraction)|GO:0005737(cytoplasm)|GO:0005792(microsome)|GO:0005829(cytosol)|GO:0005975(carbohydrate metabolic process)|GO:0006002(fructose 6-phosphate metabolic process)|GO:0008152(metabolic process)|GO:0009052(pentose-phosphate shunt, non-oxidative branch)|GO:0016740(transferase activity)|GO:0019682(glyceraldehyde-3-…	2.16782	2.03035
TAP2	transporter 2, ATP-binding cassette, sub-family B (MDR/TAP)	GO:0000166(nucleotide binding)|GO:0004409(homoaconitate hydratase activity)|GO:0005215(transporter activity)|GO:0005524(ATP binding)|GO:0005634(nucleus)|GO:0005783(endoplasmic reticulum)|GO:0005788(endoplasmic reticulum lumen)|GO:0005829(cytosol)|GO:0006461(protein complex assembly)|GO:0006886(intracellular protein transport)|GO:0006955(immune response)|GO:0015197(peptide transporter activity)|GO…	2.04097	2.12368
TAS1R1	taste receptor, type 1, member 1	GO:0004872(receptor activity)|GO:0005886(plasma membrane)|GO:0007165(signal transduction)|GO:0007186(G-protein coupled receptor protein signaling pathway)|GO:0008527(taste receptor activity)|GO:0016021(integral to membrane)|GO:0046982(protein heterodimerization activity)|GO:0050896(response to stimulus)|GO:0050917(sensory perception of umami taste)	2.27101	2.39204
TBKBP1	TBK1 binding protein 1	GO:0045087(innate immune response)	2.56977	2.91099
TCF23	transcription factor 23	GO:0005634(nucleus)|GO:0007275(multicellular organismal development)|GO:0007517(muscle organ development)|GO:0030154(cell differentiation)|GO:0030528(transcription regulator activity)|GO:0045449(regulation of transcription)	2.18556	2.13124
TCL6	T-cell leukemia/lymphoma 6	GO:0003674(molecular_function)|GO:0005575(cellular_component)|GO:0008150(biological_process)	2.31657	2.57404
TCN1	transcobalamin I (vitamin B12 binding protein, R binder family)	GO:0005576(extracellular region)|GO:0006811(ion transport)|GO:0006824(cobalt ion transport)|GO:0015889(cobalamin transport)|GO:0031419(cobalamin binding)|GO:0050897(cobalt ion binding)	9.71787	7.82789
TCN2	transcobalamin II; macrocytic anemia	GO:0005576(extracellular region)|GO:0005615(extracellular space)|GO:0006811(ion transport)|GO:0006824(cobalt ion transport)|GO:0015889(cobalamin transport)|GO:0031419(cobalamin binding)|GO:0050897(cobalt ion binding)	2.58439	2.48696
TCTEX1D1	Tctex1 domain containing 1		3.25851	4.03681
TDRD9	tudor domain containing 9	GO:0000166(nucleotide binding)|GO:0003676(nucleic acid binding)|GO:0004386(helicase activity)|GO:0005524(ATP binding)|GO:0016787(hydrolase activity)	2.62311	2.65747
TEAD1	TEA domain family member 1 (SV40 transcriptional enhancer factor)	GO:0003700(transcription factor activity)|GO:0005515(protein binding)|GO:0005634(nucleus)|GO:0005667(transcription factor complex)|GO:0006355(regulation of transcription, DNA-dependent)|GO:0007507(heart development)|GO:0016563(transcription activator activity)|GO:0045944(positive regulation of transcription from RNA polymerase II promoter)	2.21249	2.02375
TEAD3	TEA domain family member 3	GO:0003700(transcription factor activity)|GO:0003702(RNA polymerase II transcription factor activity)|GO:0005634(nucleus)|GO:0006357(regulation of transcription from RNA polymerase II promoter)|GO:0007565(female pregnancy)	2.3865	2.93543
TECPR2	tectonin beta-propeller repeat containing 2		2.5128	2.18604
TET2	tet oncogene family member 2	GO:0005506(iron ion binding)|GO:0007049(cell cycle)|GO:0016491(oxidoreductase activity)|GO:0016702(oxidoreductase activity, acting on single donors with incorporation of molecular oxygen, incorporation of two atoms of oxygen)|GO:0016706(oxidoreductase activity, acting on paired donors, with incorporation or reduction of molecular oxygen, 2-oxoglutarate as one donor, and incorporation of one atom …	2.62307	3.31701
TFDP1	transcription factor Dp-1	GO:0003700(transcription factor activity)|GO:0003713(transcription coactivator activity)|GO:0005634(nucleus)|GO:0005654(nucleoplasm)|GO:0005667(transcription factor complex)|GO:0006357(regulation of transcription from RNA polymerase II promoter)|GO:0007049(cell cycle)|GO:0008134(transcription factor binding)|GO:0008283(cell proliferation)|GO:0019904(protein domain specific binding)	2.21373	2.08531
TFEC	transcription factor EC	GO:0003700(transcription factor activity)|GO:0003713(transcription coactivator activity)|GO:0003714(transcription corepressor activity)|GO:0005634(nucleus)|GO:0034605(cellular response to heat)|GO:0045449(regulation of transcription)	2.12498	2.22723
TFF2	trefoil factor 2	GO:0005576(extracellular region)|GO:0007586(digestion)	2.32224	2.41152
TFF3	trefoil factor 3 (intestinal)	GO:0005576(extracellular region)|GO:0005578(proteinaceous extracellular matrix)|GO:0006952(defense response)|GO:0007586(digestion)|GO:0030141(secretory granule)|GO:0032579(apical lamina of hyaline layer)|GO:0043434(response to peptide hormone stimulus)	2.61833	2.79297
TGFA	transforming growth factor, alpha	GO:0000187(activation of MAPK activity)|GO:0004708(MAP kinase kinase activity)|GO:0004871(signal transducer activity)|GO:0005154(epidermal growth factor receptor binding)|GO:0005515(protein binding)|GO:0005576(extracellular region)|GO:0005615(extracellular space)|GO:0005886(plasma membrane)|GO:0008083(growth factor activity)|GO:0008283(cell proliferation)|GO:0009986(cell surface)|GO:0016021(integ…	3.23001	2.67241
TGM3	transglutaminase 3 (E polypeptide, protein-glutamine-gamma-glutamyltransferase)	GO:0000287(magnesium ion binding)|GO:0003810(protein-glutamine gamma-glutamyltransferase activity)|GO:0003924(GTPase activity)|GO:0005509(calcium ion binding)|GO:0005525(GTP binding)|GO:0005737(cytoplasm)|GO:0006464(protein modification process)|GO:0008415(acyltransferase activity)|GO:0016746(transferase activity, transferring acyl groups)|GO:0018149(peptide cross-linking)|GO:0019003(GDP binding)…	3.41331	3.35453
THY1	Thy-1 cell surface antigen	GO:0001525(angiogenesis)|GO:0005100(Rho GTPase activator activity)|GO:0005178(integrin binding)|GO:0005783(endoplasmic reticulum)|GO:0005829(cytosol)|GO:0005886(plasma membrane)|GO:0005887(integral to plasma membrane)|GO:0006469(negative regulation of protein kinase activity)|GO:0007010(cytoskeleton organization)|GO:0009897(external side of plasma membrane)|GO:0016337(cell-cell adhesion)|GO:00198…	2.4364	2.76144
TIMP2	TIMP metallopeptidase inhibitor 2	GO:0004857(enzyme inhibitor activity)|GO:0005178(integrin binding)|GO:0005515(protein binding)|GO:0005576(extracellular region)|GO:0005604(basement membrane)|GO:0008047(enzyme activator activity)|GO:0008191(metalloendopeptidase inhibitor activity)|GO:0008285(negative regulation of cell proliferation)|GO:0009986(cell surface)|GO:0030814(regulation of cAMP metabolic process)|GO:0043408(regulation o…	2.45684	2.11067
TLE6	transducin-like enhancer of split 6 (E(sp1) homolog, Drosophila)	GO:0005634(nucleus)|GO:0005737(cytoplasm)|GO:0045449(regulation of transcription)	3.90929	3.39821
TLN2	talin 2	GO:0001726(ruffle)|GO:0003779(actin binding)|GO:0005200(structural constituent of cytoskeleton)|GO:0005515(protein binding)|GO:0005737(cytoplasm)|GO:0005886(plasma membrane)|GO:0005911(cell-cell junction)|GO:0005925(focal adhesion)|GO:0007016(cytoskeletal anchoring at plasma membrane)|GO:0007043(cell-cell junction assembly)|GO:0007155(cell adhesion)|GO:0015629(actin cytoskeleton)|GO:0045202(synap…	2.47145	2.2642
TLR1	toll-like receptor 1	GO:0004888(transmembrane receptor activity)|GO:0005515(protein binding)|GO:0005886(plasma membrane)|GO:0005887(integral to plasma membrane)|GO:0006954(inflammatory response)|GO:0007165(signal transduction)|GO:0031410(cytoplasmic vesicle)|GO:0042116(macrophage activation)|GO:0042535(positive regulation of tumor necrosis factor biosynthetic process)|GO:0045087(innate immune response)|GO:0045410(pos…	2.51794	2.15702
TLR4	toll-like receptor 4	GO:0001875(lipopolysaccharide receptor activity)|GO:0002224(toll-like receptor signaling pathway)|GO:0002282(microglial cell activation during immune response)|GO:0002537(production of nitric oxide during acute inflammatory response)|GO:0004888(transmembrane receptor activity)|GO:0005515(protein binding)|GO:0005737(cytoplasm)|GO:0005886(plasma membrane)|GO:0005887(integral to plasma membrane)|GO:…	3.34659	2.46871
TLR5	toll-like receptor 5	GO:0004888(transmembrane receptor activity)|GO:0005149(interleukin-1 receptor binding)|GO:0005515(protein binding)|GO:0005886(plasma membrane)|GO:0006954(inflammatory response)|GO:0007165(signal transduction)|GO:0007249(I-kappaB kinase/NF-kappaB cascade)|GO:0016021(integral to membrane)|GO:0045087(innate immune response)	3.12899	3.07166
TLR6	toll-like receptor 6	GO:0002224(toll-like receptor signaling pathway)|GO:0002282(microglial cell activation during immune response)|GO:0004888(transmembrane receptor activity)|GO:0005886(plasma membrane)|GO:0005887(integral to plasma membrane)|GO:0006954(inflammatory response)|GO:0007165(signal transduction)|GO:0007250(activation of NF-kappaB-inducing kinase activity)|GO:0008034(lipoprotein binding)|GO:0031410(cytopl…	2.46273	2.51057
TLX2	T-cell leukemia homeobox 2	GO:0001707(mesoderm formation)|GO:0003700(transcription factor activity)|GO:0005515(protein binding)|GO:0005575(cellular_component)|GO:0005634(nucleus)|GO:0005737(cytoplasm)|GO:0006355(regulation of transcription, DNA-dependent)|GO:0007275(multicellular organismal development)|GO:0008150(biological_process)|GO:0043565(sequence-specific DNA binding)|GO:0048484(enteric nervous system development)|G…	2.46643	2.4635
TMEM133	transmembrane protein 133	GO:0016020(membrane)|GO:0016021(integral to membrane)	0.484042	0.438088
TMEM148	transmembrane protein 148		2.23523	2.6478
TMEM38A	transmembrane protein 38A	GO:0005267(potassium channel activity)|GO:0005634(nucleus)|GO:0006811(ion transport)|GO:0006813(potassium ion transport)|GO:0016020(membrane)|GO:0016021(integral to membrane)|GO:0030955(potassium ion binding)|GO:0031965(nuclear membrane)|GO:0033017(sarcoplasmic reticulum membrane)	2.21739	2.38061
TMEM56	transmembrane protein 56	GO:0003674(molecular_function)|GO:0005575(cellular_component)|GO:0008150(biological_process)|GO:0016020(membrane)|GO:0016021(integral to membrane)	3.23373	3.73004
TMEM92	transmembrane protein 92	GO:0016020(membrane)|GO:0016021(integral to membrane)	4.80916	3.19709
TMOD1	tropomodulin 1	GO:0003779(actin binding)|GO:0005523(tropomyosin binding)|GO:0005634(nucleus)|GO:0005737(cytoplasm)|GO:0016020(membrane)|GO:0030016(myofibril)|GO:0030239(myofibril assembly)|GO:0030863(cortical cytoskeleton)	2.08103	2.11012
TNFAIP6	tumor necrosis factor, alpha-induced protein 6	GO:0005515(protein binding)|GO:0005540(hyaluronic acid binding)|GO:0006954(inflammatory response)|GO:0007155(cell adhesion)|GO:0007165(signal transduction)|GO:0007267(cell-cell signaling)	4.93796	4.37401
TNFRSF10C	tumor necrosis factor receptor superfamily, member 10c, decoy without an intracellular domain	GO:0004888(transmembrane receptor activity)|GO:0005886(plasma membrane)|GO:0005887(integral to plasma membrane)|GO:0006915(apoptosis)|GO:0007165(signal transduction)|GO:0031225(anchored to membrane)	2.93979	2.75355
TNFSF13	tumor necrosis factor (ligand) superfamily, member 13	GO:0005125(cytokine activity)|GO:0005164(tumor necrosis factor receptor binding)|GO:0005576(extracellular region)|GO:0005615(extracellular space)|GO:0006955(immune response)|GO:0007165(signal transduction)|GO:0008284(positive regulation of cell proliferation)|GO:0016020(membrane)|GO:0048298(positive regulation of isotype switching to IgA isotypes)	2.19416	2.02804
TNFSF13B	tumor necrosis factor (ligand) superfamily, member 13b	GO:0001782(B cell homeostasis)|GO:0002636(positive regulation of germinal center formation)|GO:0005125(cytokine activity)|GO:0005164(tumor necrosis factor receptor binding)|GO:0005576(extracellular region)|GO:0005615(extracellular space)|GO:0005625(soluble fraction)|GO:0005886(plasma membrane)|GO:0007165(signal transduction)|GO:0008284(positive regulation of cell proliferation)|GO:0016021(integra…	2.75113	2.37084
TNP2	transition protein 2 (during histone to protamine replacement)	GO:0000786(nucleosome)|GO:0003677(DNA binding)|GO:0005634(nucleus)|GO:0005694(chromosome)|GO:0007275(multicellular organismal development)|GO:0007283(spermatogenesis)|GO:0007339(binding of sperm to zona pellucida)|GO:0007340(acrosome reaction)|GO:0007341(penetration of zona pellucida)|GO:0008270(zinc ion binding)|GO:0030154(cell differentiation)|GO:0030317(sperm motility)|GO:0046872(metal ion bin…	2.14575	2.31129
TNRC18	trinucleotide repeat containing 18	GO:0003677(DNA binding)	2.05942	3.22132
TNS1	tensin 1	GO:0003779(actin binding)|GO:0005515(protein binding)|GO:0005737(cytoplasm)|GO:0005856(cytoskeleton)|GO:0005925(focal adhesion)|GO:0007044(cell-substrate junction assembly)|GO:0016477(cell migration)|GO:0030055(cell-substrate junction)	2.29577	2.41227
TNXB	tenascin XB	GO:0005178(integrin binding)|GO:0005576(extracellular region)|GO:0005578(proteinaceous extracellular matrix)|GO:0005583(fibrillar collagen)|GO:0005615(extracellular space)|GO:0005622(intracellular)|GO:0007155(cell adhesion)|GO:0007165(signal transduction)|GO:0008201(heparin binding)|GO:0030036(actin cytoskeleton organization)|GO:0032963(collagen metabolic process)|GO:0048251(elastic fiber assembl…	2.97883	3.92689
TOX3	TOX high mobility group box family member 3	GO:0003677(DNA binding)|GO:0005634(nucleus)	2.41486	2.831
TPM1	tropomyosin 1 (alpha)	GO:0001725(stress fiber)|GO:0003065(positive regulation of heart rate by epinephrine)|GO:0003779(actin binding)|GO:0005200(structural constituent of cytoskeleton)|GO:0005737(cytoplasm)|GO:0005856(cytoskeleton)|GO:0005862(muscle thin filament tropomyosin)|GO:0006928(cell motion)|GO:0006937(regulation of muscle contraction)|GO:0007010(cytoskeleton organization)|GO:0008016(regulation of heart contra…	2.42497	2.44956
TPM2	tropomyosin 2 (beta)	GO:0003779(actin binding)|GO:0005737(cytoplasm)|GO:0005856(cytoskeleton)|GO:0005862(muscle thin filament tropomyosin)|GO:0008307(structural constituent of muscle)|GO:0043462(regulation of ATPase activity)	0.461209	0.44448
TREM1	triggering receptor expressed on myeloid cells 1	GO:0004872(receptor activity)|GO:0005576(extracellular region)|GO:0005886(plasma membrane)|GO:0006959(humoral immune response)|GO:0007242(intracellular signaling cascade)|GO:0016021(integral to membrane)	3.79096	3.10418
TRIM10	tripartite motif-containing 10	GO:0003674(molecular_function)|GO:0005515(protein binding)|GO:0005622(intracellular)|GO:0005737(cytoplasm)|GO:0008150(biological_process)|GO:0008270(zinc ion binding)|GO:0030218(erythrocyte differentiation)|GO:0046872(metal ion binding)	2.17399	2.52871
TRIM6	tripartite motif-containing 6	GO:0003674(molecular_function)|GO:0005515(protein binding)|GO:0005622(intracellular)|GO:0005737(cytoplasm)|GO:0008270(zinc ion binding)|GO:0046872(metal ion binding)|GO:0070206(protein trimerization)	3.55746	3.73497
TRIM66	tripartite motif-containing 66	GO:0005515(protein binding)|GO:0005622(intracellular)|GO:0005634(nucleus)|GO:0008270(zinc ion binding)|GO:0046872(metal ion binding)	0.45138	0.414498
TRIM9	tripartite motif-containing 9	GO:0005515(protein binding)|GO:0005622(intracellular)|GO:0005737(cytoplasm)|GO:0008270(zinc ion binding)|GO:0042803(protein homodimerization activity)|GO:0046872(metal ion binding)	2.35083	2.38862
TRPC1	transient receptor potential cation channel, subfamily C, member 1	GO:0005216(ion channel activity)|GO:0005509(calcium ion binding)|GO:0005515(protein binding)|GO:0005737(cytoplasm)|GO:0005886(plasma membrane)|GO:0005887(integral to plasma membrane)|GO:0006811(ion transport)|GO:0006816(calcium ion transport)|GO:0015279(store-operated calcium channel activity)|GO:0016323(basolateral plasma membrane)|GO:0030017(sarcomere)|GO:0043034(costamere)|GO:0043234(protein c…	0.43058	0.48098
TRPM5	transient receptor potential cation channel, subfamily M, member 5	GO:0004872(receptor activity)|GO:0005244(voltage-gated ion channel activity)|GO:0005886(plasma membrane)|GO:0006811(ion transport)|GO:0016021(integral to membrane)|GO:0055085(transmembrane transport)	2.11462	2.39512
TRPM6	transient receptor potential cation channel, subfamily M, member 6	GO:0000166(nucleotide binding)|GO:0004674(protein serine/threonine kinase activity)|GO:0005262(calcium channel activity)|GO:0005509(calcium ion binding)|GO:0005524(ATP binding)|GO:0005737(cytoplasm)|GO:0005794(Golgi apparatus)|GO:0005886(plasma membrane)|GO:0006468(protein amino acid phosphorylation)|GO:0006811(ion transport)|GO:0006816(calcium ion transport)|GO:0008270(zinc ion binding)|GO:00096…	2.65708	2.54279
TSHZ2	teashirt zinc finger homeobox 2	GO:0003700(transcription factor activity)|GO:0005622(intracellular)|GO:0005634(nucleus)|GO:0006355(regulation of transcription, DNA-dependent)|GO:0007275(multicellular organismal development)|GO:0008270(zinc ion binding)|GO:0043565(sequence-specific DNA binding)|GO:0046872(metal ion binding)	0.485484	0.442556
TSPAN10	tetraspanin 10	GO:0016020(membrane)|GO:0016021(integral to membrane)	2.1334	2.20595
TSPAN16	tetraspanin 16	GO:0016020(membrane)|GO:0016021(integral to membrane)	2.2208	2.53618
TSPAN7	tetraspanin 7	GO:0005886(plasma membrane)|GO:0005887(integral to plasma membrane)|GO:0006487(protein amino acid N-linked glycosylation)	3.23723	3.02434
TSPYL1	TSPY-like 1	GO:0003674(molecular_function)|GO:0005575(cellular_component)|GO:0005634(nucleus)|GO:0005730(nucleolus)|GO:0006334(nucleosome assembly)|GO:0008150(biological_process)	0.459172	0.375215
TSPYL2	TSPY-like 2	GO:0000182(rDNA binding)|GO:0005515(protein binding)|GO:0005634(nucleus)|GO:0005730(nucleolus)|GO:0005737(cytoplasm)|GO:0006334(nucleosome assembly)|GO:0008156(negative regulation of DNA replication)|GO:0009966(regulation of signal transduction)|GO:0016568(chromatin modification)|GO:0030308(negative regulation of cell growth)|GO:0045449(regulation of transcription)|GO:0045786(negative regulation …	2.0007	2.03373
TTTY12	testis-specific transcript, Y-linked 12 (non-protein coding)		2.14461	2.17193
UBE2D1	ubiquitin-conjugating enzyme E2D 1 (UBC4/5 homolog, yeast)	GO:0000166(nucleotide binding)|GO:0000209(protein polyubiquitination)|GO:0004842(ubiquitin-protein ligase activity)|GO:0005515(protein binding)|GO:0005524(ATP binding)|GO:0005654(nucleoplasm)|GO:0005829(cytosol)|GO:0006511(ubiquitin-dependent protein catabolic process)|GO:0016874(ligase activity)|GO:0030509(BMP signaling pathway)|GO:0031145(anaphase-promoting complex-dependent proteasomal ubiquit…	2.09455	2.00761
UBL4A	ubiquitin-like 4A	GO:0006464(protein modification process)|GO:0019787(small conjugating protein ligase activity)	2.79126	2.97723
UBQLN3	ubiquilin 3		2.88108	2.42893
UCN2	urocortin 2	GO:0001664(G-protein-coupled receptor binding)|GO:0005179(hormone activity)|GO:0005576(extracellular region)|GO:0006171(cAMP biosynthetic process)|GO:0006950(response to stress)|GO:0007586(digestion)|GO:0008283(cell proliferation)|GO:0042562(hormone binding)	2.41865	2.48132
UGT2A1	UDP glucuronosyltransferase 2 family, polypeptide A1	GO:0007608(sensory perception of smell)|GO:0008152(metabolic process)|GO:0009593(detection of chemical stimulus)|GO:0015020(glucuronosyltransferase activity)|GO:0016020(membrane)|GO:0016021(integral to membrane)|GO:0050896(response to stimulus)	2.12248	2.77851
UPK3B	uroplakin 3B	GO:0005886(plasma membrane)|GO:0010629(negative regulation of gene expression)|GO:0016021(integral to membrane)	2.40664	2.48148
USP17	ubiquitin specific peptidase 17	GO:0004221(ubiquitin thiolesterase activity)|GO:0005634(nucleus)|GO:0005730(nucleolus)|GO:0006511(ubiquitin-dependent protein catabolic process)|GO:0006915(apoptosis)|GO:0008233(peptidase activity)|GO:0008234(cysteine-type peptidase activity)	2.58839	2.50159
UTF1	undifferentiated embryonic cell transcription factor 1	GO:0003702(RNA polymerase II transcription factor activity)|GO:0003713(transcription coactivator activity)|GO:0005515(protein binding)|GO:0005634(nucleus)|GO:0008584(male gonad development)|GO:0045449(regulation of transcription)|GO:0045944(positive regulation of transcription from RNA polymerase II promoter)	2.14	2.17506
UTS2D	urotensin 2 domain containing	GO:0005179(hormone activity)|GO:0005576(extracellular region)	0.319904	0.236046
VASH1	vasohibin 1	GO:0001937(negative regulation of endothelial cell proliferation)|GO:0005576(extracellular region)|GO:0005615(extracellular space)|GO:0005737(cytoplasm)|GO:0005783(endoplasmic reticulum)|GO:0007049(cell cycle)|GO:0007050(cell cycle arrest)|GO:0016525(negative regulation of angiogenesis)|GO:0043537(negative regulation of blood vessel endothelial cell migration)	2.57347	3.41845
VNN1	vanin 1	GO:0002526(acute inflammatory response)|GO:0002544(chronic inflammatory response)|GO:0005886(plasma membrane)|GO:0006807(nitrogen compound metabolic process)|GO:0006916(anti-apoptosis)|GO:0006928(cell motion)|GO:0006979(response to oxidative stress)|GO:0015939(pantothenate metabolic process)|GO:0016021(integral to membrane)|GO:0016337(cell-cell adhesion)|GO:0017159(pantetheine hydrolase activity)…	3.03274	2.6127
VNN2	vanin 2	GO:0005886(plasma membrane)|GO:0006807(nitrogen compound metabolic process)|GO:0006928(cell motion)|GO:0015939(pantothenate metabolic process)|GO:0017159(pantetheine hydrolase activity)|GO:0031225(anchored to membrane)	2.8335	2.98518
VNN3	vanin 3	GO:0005575(cellular_component)|GO:0005615(extracellular space)|GO:0005886(plasma membrane)|GO:0006807(nitrogen compound metabolic process)|GO:0008150(biological_process)|GO:0015939(pantothenate metabolic process)|GO:0017159(pantetheine hydrolase activity)|GO:0031225(anchored to membrane)	2.77329	2.62979
VSTM2L	V-set and transmembrane domain containing 2 like		0.365294	0.462552
WBSCR17	Williams-Beuren syndrome chromosome region 17	GO:0004653(polypeptide N-acetylgalactosaminyltransferase activity)|GO:0005509(calcium ion binding)|GO:0005529(sugar binding)|GO:0005794(Golgi apparatus)|GO:0016020(membrane)|GO:0016021(integral to membrane)|GO:0016757(transferase activity, transferring glycosyl groups)|GO:0030145(manganese ion binding)	2.14422	2.01363
WDFY3	WD repeat and FYVE domain containing 3	GO:0003831(beta-N-acetylglucosaminylglycopeptide beta-1,4-galactosyltransferase activity)|GO:0005488(binding)|GO:0005737(cytoplasm)|GO:0008270(zinc ion binding)|GO:0016020(membrane)|GO:0046872(metal ion binding)	4.00229	3.27961
WDHD1	WD repeat and HMG-box DNA binding protein 1	GO:0003677(DNA binding)|GO:0005634(nucleus)|GO:0005654(nucleoplasm)|GO:0005730(nucleolus)|GO:0005737(cytoplasm)	0.471521	0.458478
WDTC1	WD and tetratricopeptide repeats 1	GO:0001701(in utero embryonic development)|GO:0004857(enzyme inhibitor activity)|GO:0005634(nucleus)|GO:0005829(cytosol)|GO:0006006(glucose metabolic process)|GO:0008361(regulation of cell size)|GO:0010553(negative regulation of gene-specific transcription from RNA polymerase II promoter)|GO:0032869(cellular response to insulin stimulus)|GO:0035264(multicellular organism growth)|GO:0042393(histon…	2.8944	3.20078
WFDC1	WAP four-disulfide core domain 1	GO:0003674(molecular_function)|GO:0004867(serine-type endopeptidase inhibitor activity)|GO:0005576(extracellular region)|GO:0005615(extracellular space)|GO:0030308(negative regulation of cell growth)|GO:0030414(peptidase inhibitor activity)|GO:0032355(response to estradiol stimulus)|GO:0042493(response to drug)|GO:0050680(negative regulation of epithelial cell proliferation)	2.32598	2.22933
WFDC12	WAP four-disulfide core domain 12	GO:0004867(serine-type endopeptidase inhibitor activity)|GO:0005576(extracellular region)|GO:0005615(extracellular space)|GO:0030414(peptidase inhibitor activity)|GO:0042742(defense response to bacterium)	2.09375	2.26612
WFDC9	WAP four-disulfide core domain 9	GO:0005576(extracellular region)	5.31243	4.9788
XK	X-linked Kx blood group (McLeod syndrome)	GO:0005215(transporter activity)|GO:0005515(protein binding)|GO:0006810(transport)|GO:0006865(amino acid transport)|GO:0016020(membrane)|GO:0016021(integral to membrane)	2.06089	2.11129
XKR3	XK, Kell blood group complex subunit-related family, member 3	GO:0005886(plasma membrane)|GO:0016021(integral to membrane)	2.95761	2.41983
XKR6	XK, Kell blood group complex subunit-related family, member 6	GO:0016020(membrane)|GO:0016021(integral to membrane)	0.476329	0.458596
YOD1	YOD1 OTU deubiquinating enzyme 1 homolog (S. cerevisiae)	GO:0005622(intracellular)|GO:0006519(cellular amino acid and derivative metabolic process)|GO:0008233(peptidase activity)|GO:0008234(cysteine-type peptidase activity)|GO:0008270(zinc ion binding)|GO:0016289(CoA hydrolase activity)|GO:0019941(modification-dependent protein catabolic process)|GO:0046872(metal ion binding)	2.9688	2.43877
ZBTB32	zinc finger and BTB domain containing 32	GO:0000122(negative regulation of transcription from RNA polymerase II promoter)|GO:0000228(nuclear chromosome)|GO:0001817(regulation of cytokine production)|GO:0003677(DNA binding)|GO:0003704(specific RNA polymerase II transcription factor activity)|GO:0003714(transcription corepressor activity)|GO:0005515(protein binding)|GO:0005622(intracellular)|GO:0005634(nucleus)|GO:0005654(nucleoplasm)|GO:…	0.38146	0.420775
ZBTB47	zinc finger and BTB domain containing 47	GO:0003677(DNA binding)|GO:0005622(intracellular)|GO:0005634(nucleus)|GO:0008270(zinc ion binding)|GO:0045449(regulation of transcription)|GO:0046872(metal ion binding)	2.37202	2.21704
ZDHHC11	zinc finger, DHHC-type containing 11	GO:0008270(zinc ion binding)|GO:0008415(acyltransferase activity)|GO:0016020(membrane)|GO:0016021(integral to membrane)|GO:0016740(transferase activity)|GO:0046872(metal ion binding)	0.423304	0.399151
ZDHHC5	zinc finger, DHHC-type containing 5	GO:0008270(zinc ion binding)|GO:0008415(acyltransferase activity)|GO:0016020(membrane)|GO:0016021(integral to membrane)|GO:0016740(transferase activity)|GO:0046872(metal ion binding)	2.23361	2.57063
ZFP28	zinc finger protein 28 homolog (mouse)	GO:0003677(DNA binding)|GO:0005622(intracellular)|GO:0005634(nucleus)|GO:0006355(regulation of transcription, DNA-dependent)|GO:0008270(zinc ion binding)|GO:0046872(metal ion binding)	0.414905	0.35
ZFP30	zinc finger protein 30 homolog (mouse)	GO:0003677(DNA binding)|GO:0005622(intracellular)|GO:0005634(nucleus)|GO:0006355(regulation of transcription, DNA-dependent)|GO:0008270(zinc ion binding)|GO:0046872(metal ion binding)	0.458656	0.381342
ZFYVE9	zinc finger, FYVE domain containing 9	GO:0004872(receptor activity)|GO:0005515(protein binding)|GO:0005737(cytoplasm)|GO:0006897(endocytosis)|GO:0007181(transforming growth factor beta receptor complex assembly)|GO:0007183(SMAD protein complex assembly)|GO:0007184(SMAD protein nuclear translocation)|GO:0008236(serine-type peptidase activity)|GO:0008270(zinc ion binding)|GO:0031901(early endosome membrane)|GO:0046872(metal ion binding)	0.415833	0.421334
ZMIZ2	zinc finger, MIZ-type containing 2	GO:0005515(protein binding)|GO:0005634(nucleus)|GO:0008270(zinc ion binding)|GO:0030374(ligand-dependent nuclear receptor transcription coactivator activity)|GO:0043596(nuclear replication fork)|GO:0045449(regulation of transcription)|GO:0045944(positive regulation of transcription from RNA polymerase II promoter)|GO:0046872(metal ion binding)	2.00418	2.11452
ZNF205	zinc finger protein 205	GO:0003677(DNA binding)|GO:0005515(protein binding)|GO:0005622(intracellular)|GO:0005634(nucleus)|GO:0006355(regulation of transcription, DNA-dependent)|GO:0008270(zinc ion binding)|GO:0046872(metal ion binding)	2.16727	2.20692
ZNF30	zinc finger protein 30	GO:0003677(DNA binding)|GO:0005622(intracellular)|GO:0005634(nucleus)|GO:0008270(zinc ion binding)|GO:0045449(regulation of transcription)|GO:0046872(metal ion binding)	0.477774	0.49849
ZNF341	zinc finger protein 341	GO:0003677(DNA binding)|GO:0005622(intracellular)|GO:0005634(nucleus)|GO:0008270(zinc ion binding)|GO:0045449(regulation of transcription)|GO:0046872(metal ion binding)	2.0375	2.18067
ZNF365	zinc finger protein 365	GO:0005515(protein binding)|GO:0005622(intracellular)|GO:0008270(zinc ion binding)	0.435015	0.445053
ZNF438	zinc finger protein 438	GO:0003677(DNA binding)|GO:0005622(intracellular)|GO:0005634(nucleus)|GO:0008270(zinc ion binding)|GO:0045449(regulation of transcription)|GO:0046872(metal ion binding)	2.72675	2.35783
ZNF556	zinc finger protein 556	GO:0003677(DNA binding)|GO:0005622(intracellular)|GO:0005634(nucleus)|GO:0006355(regulation of transcription, DNA-dependent)|GO:0008270(zinc ion binding)|GO:0046872(metal ion binding)	0.377173	0.358418
ZNF69	zinc finger protein 69	GO:0003700(transcription factor activity)|GO:0005622(intracellular)|GO:0005634(nucleus)|GO:0006355(regulation of transcription, DNA-dependent)|GO:0008270(zinc ion binding)|GO:0046872(metal ion binding)	0.411369	0.493782
ZNF853	zinc finger protein 853		0.463088	0.497278
ZNF880	zinc finger protein 880	GO:0003676(nucleic acid binding)|GO:0005622(intracellular)|GO:0006355(regulation of transcription, DNA-dependent)|GO:0008270(zinc ion binding)|GO:0046872(metal ion binding)	0.336452	0.294055
Expression altered only at week 0
ABCA1	ATP-binding cassette, sub-family A (ABC1), member 1	GO:0000166(nucleotide binding)|GO:0002790(peptide secretion)|GO:0005524(ATP binding)|GO:0005543(phospholipid binding)|GO:0005548(phospholipid transporter activity)|GO:0005624(membrane fraction)|GO:0005794(Golgi apparatus)|GO:0005886(plasma membrane)|GO:0005887(integral to plasma membrane)|GO:0006497(protein amino acid lipidation)|GO:0006629(lipid metabolic process)|GO:0006810(transport)|GO:000691…	2.19482
ABHD5	abhydrolase domain containing 5	GO:0003841(1-acylglycerol-3-phosphate O-acyltransferase activity)|GO:0004806(triglyceride lipase activity)|GO:0005515(protein binding)|GO:0005737(cytoplasm)|GO:0005829(cytosol)|GO:0006629(lipid metabolic process)|GO:0006631(fatty acid metabolic process)|GO:0006654(phosphatidic acid biosynthetic process)|GO:0008654(phospholipid biosynthetic process)|GO:0010891(negative regulation of sequestering o…	2.13915
ABTB1	ankyrin repeat and BTB (POZ) domain containing 1	GO:0003746(translation elongation factor activity)|GO:0005515(protein binding)|GO:0005737(cytoplasm)|GO:0006412(translation)	2.20632
ACOT2	acyl-CoA thioesterase 2	GO:0000038(very-long-chain fatty acid metabolic process)|GO:0001676(long-chain fatty acid metabolic process)|GO:0004091(carboxylesterase activity)|GO:0005515(protein binding)|GO:0005739(mitochondrion)|GO:0006629(lipid metabolic process)|GO:0006637(acyl-CoA metabolic process)|GO:0016290(palmitoyl-CoA hydrolase activity)|GO:0016787(hydrolase activity)|GO:0016790(thiolester hydrolase activity)	0.438902
ACOX1	acyl-Coenzyme A oxidase 1, palmitoyl	GO:0003995(acyl-CoA dehydrogenase activity)|GO:0003997(acyl-CoA oxidase activity)|GO:0005737(cytoplasm)|GO:0005739(mitochondrion)|GO:0005777(peroxisome)|GO:0005778(peroxisomal membrane)|GO:0006091(generation of precursor metabolites and energy)|GO:0006629(lipid metabolic process)|GO:0006693(prostaglandin metabolic process)|GO:0007283(spermatogenesis)|GO:0033540(fatty acid beta-oxidation using acy…	2.05269
ACPP	acid phosphatase, prostate	GO:0003993(acid phosphatase activity)|GO:0005576(extracellular region)|GO:0005764(lysosome)|GO:0016020(membrane)|GO:0016021(integral to membrane)|GO:0016787(hydrolase activity)	2.1901
ACSBG1	acyl-CoA synthetase bubblegum family member 1	GO:0000038(very-long-chain fatty acid metabolic process)|GO:0000166(nucleotide binding)|GO:0001676(long-chain fatty acid metabolic process)|GO:0004467(long-chain-fatty-acid-CoA ligase activity)|GO:0005524(ATP binding)|GO:0005737(cytoplasm)|GO:0005783(endoplasmic reticulum)|GO:0005792(microsome)|GO:0006629(lipid metabolic process)|GO:0008152(metabolic process)|GO:0016023(cytoplasmic membrane-bound…	2.19761
ADD2	adducin 2 (beta)	GO:0005198(structural molecule activity)|GO:0005516(calmodulin binding)|GO:0005737(cytoplasm)|GO:0005856(cytoskeleton)|GO:0005886(plasma membrane)|GO:0006811(ion transport)|GO:0008290(F-actin capping protein complex)|GO:0030036(actin cytoskeleton organization)|GO:0030097(hemopoiesis)|GO:0030507(spectrin binding)|GO:0032092(positive regulation of protein binding)|GO:0042803(protein homodimerizatio…	2.04688
AFF3	AF4/FMR2 family, member 3	GO:0003677(DNA binding)|GO:0005634(nucleus)|GO:0007275(multicellular organismal development)|GO:0045449(regulation of transcription)	0.477872
AGAP1	ArfGAP with GTPase domain, ankyrin repeat and PH domain 1	GO:0000166(nucleotide binding)|GO:0005525(GTP binding)|GO:0005622(intracellular)|GO:0005737(cytoplasm)|GO:0007264(small GTPase mediated signal transduction)|GO:0008060(ARF GTPase activator activity)|GO:0008270(zinc ion binding)|GO:0015031(protein transport)|GO:0032312(regulation of ARF GTPase activity)|GO:0046872(metal ion binding)	0.497148
AGPAT9	1-acylglycerol-3-phosphate O-acyltransferase 9	GO:0004366(glycerol-3-phosphate O-acyltransferase activity)|GO:0005783(endoplasmic reticulum)|GO:0005789(endoplasmic reticulum membrane)|GO:0008152(metabolic process)|GO:0008415(acyltransferase activity)|GO:0008654(phospholipid biosynthetic process)|GO:0016020(membrane)|GO:0016021(integral to membrane)|GO:0016740(transferase activity)|GO:0019432(triglyceride biosynthetic process)|GO:0032006(regul…	2.12801
AGTRAP	angiotensin II receptor-associated protein	GO:0005515(protein binding)|GO:0005783(endoplasmic reticulum)|GO:0005794(Golgi apparatus)|GO:0016020(membrane)|GO:0016021(integral to membrane)|GO:0031410(cytoplasmic vesicle)	2.2039
ANK3	ankyrin 3, node of Ranvier (ankyrin G)	GO:0005515(protein binding)|GO:0005737(cytoplasm)|GO:0005856(cytoskeleton)|GO:0007165(signal transduction)|GO:0016323(basolateral plasma membrane)|GO:0045184(establishment of protein localization)	0.46544
ANKRD18A	ankyrin repeat domain 18A		2.12939
ANKRD19	ankyrin repeat domain 19		0.426732
ANKRD26	ankyrin repeat domain 26		0.39397
ANKRD36B	ankyrin repeat domain 36B		0.498105
ANKS6	ankyrin repeat and sterile alpha motif domain containing 6		0.490341
APLP2	amyloid beta (A4) precursor-like protein 2	GO:0001967(suckling behavior)|GO:0003677(DNA binding)|GO:0004867(serine-type endopeptidase inhibitor activity)|GO:0005634(nucleus)|GO:0005886(plasma membrane)|GO:0006878(cellular copper ion homeostasis)|GO:0007176(regulation of epidermal growth factor receptor activity)|GO:0007186(G-protein coupled receptor protein signaling pathway)|GO:0007617(mating behavior)|GO:0007626(locomotory behavior)|GO:…	2.08575
AQP11	aquaporin 11	GO:0001822(kidney development)|GO:0005215(transporter activity)|GO:0005737(cytoplasm)|GO:0005783(endoplasmic reticulum)|GO:0005829(cytosol)|GO:0005886(plasma membrane)|GO:0006811(ion transport)|GO:0006833(water transport)|GO:0009986(cell surface)|GO:0015793(glycerol transport)|GO:0015840(urea transport)|GO:0016021(integral to membrane)|GO:0030425(dendrite)|GO:0048388(endosomal lumen acidification…	0.466031
ARHGAP26	Rho GTPase activating protein 26	GO:0005096(GTPase activator activity)|GO:0005100(Rho GTPase activator activity)|GO:0005515(protein binding)|GO:0005575(cellular_component)|GO:0005622(intracellular)|GO:0005737(cytoplasm)|GO:0005856(cytoskeleton)|GO:0005925(focal adhesion)|GO:0007165(signal transduction)|GO:0007399(nervous system development)|GO:0030036(actin cytoskeleton organization)|GO:0030054(cell junction)	2.01068
ARHGAP29	Rho GTPase activating protein 29	GO:0005096(GTPase activator activity)|GO:0005100(Rho GTPase activator activity)|GO:0005622(intracellular)|GO:0007242(intracellular signaling cascade)|GO:0007266(Rho protein signal transduction)|GO:0008270(zinc ion binding)|GO:0046872(metal ion binding)	2.24349
ARMC9	armadillo repeat containing 9	GO:0005488(binding)	0.450547
AS3MT	arsenic (+3 oxidation state) methyltransferase	GO:0005625(soluble fraction)|GO:0005737(cytoplasm)|GO:0005829(cytosol)|GO:0008152(metabolic process)|GO:0008168(methyltransferase activity)|GO:0009404(toxin metabolic process)|GO:0016740(transferase activity)|GO:0018872(arsonoacetate metabolic process)|GO:0030791(arsenite methyltransferase activity)|GO:0030792(methylarsonite methyltransferase activity)|GO:0046685(response to arsenic)	0.459003
ASAP1	ArfGAP with SH3 domain, ankyrin repeat and PH domain 1	GO:0005515(protein binding)|GO:0005737(cytoplasm)|GO:0008060(ARF GTPase activator activity)|GO:0008270(zinc ion binding)|GO:0016020(membrane)|GO:0032312(regulation of ARF GTPase activity)|GO:0046872(metal ion binding)	3.09636
ATOH8	atonal homolog 8 (Drosophila)	GO:0003677(DNA binding)|GO:0005634(nucleus)|GO:0007275(multicellular organismal development)|GO:0007399(nervous system development)|GO:0030154(cell differentiation)|GO:0030528(transcription regulator activity)|GO:0045449(regulation of transcription)	2.1968
ATP6V1B2	ATPase, H+ transporting, lysosomal 56/58kDa, V1 subunit B2	GO:0005794(Golgi apparatus)|GO:0005829(cytosol)|GO:0005886(plasma membrane)|GO:0006811(ion transport)|GO:0015986(ATP synthesis coupled proton transport)|GO:0015992(proton transport)|GO:0016021(integral to membrane)|GO:0016787(hydrolase activity)|GO:0016820(hydrolase activity, acting on acid anhydrides, catalyzing transmembrane movement of substances)|GO:0019898(extrinsic to membrane)|GO:0033180(p…	2.01386
BCAN	brevican	GO:0005488(binding)|GO:0005529(sugar binding)|GO:0005540(hyaluronic acid binding)|GO:0005576(extracellular region)|GO:0005578(proteinaceous extracellular matrix)|GO:0007155(cell adhesion)|GO:0016020(membrane)|GO:0021766(hippocampus development)|GO:0030672(synaptic vesicle membrane)|GO:0031225(anchored to membrane)|GO:0045202(synapse)|GO:0048168(regulation of neuronal synaptic plasticity)	2.0262
BCAT1	branched chain aminotransferase 1, cytosolic	GO:0000082(G1/S transition of mitotic cell cycle)|GO:0004084(branched-chain-amino-acid transaminase activity)|GO:0005737(cytoplasm)|GO:0005829(cytosol)|GO:0008152(metabolic process)|GO:0008283(cell proliferation)|GO:0009082(branched chain family amino acid biosynthetic process)|GO:0009083(branched chain family amino acid catabolic process)|GO:0016740(transferase activity)|GO:0042802(identical pro…	3.37382
BCL2L11	BCL2-like 11 (apoptosis facilitator)	GO:0000300(peripheral to membrane of membrane fraction)|GO:0001701(in utero embryonic development)|GO:0001782(B cell homeostasis)|GO:0001783(B cell apoptosis)|GO:0001822(kidney development)|GO:0002262(myeloid cell homeostasis)|GO:0005515(protein binding)|GO:0005737(cytoplasm)|GO:0005739(mitochondrion)|GO:0005741(mitochondrial outer membrane)|GO:0005829(cytosol)|GO:0005886(plasma membrane)|GO:0007…	2.03771
BCL7A	B-cell CLL/lymphoma 7A	GO:0003674(molecular_function)|GO:0005575(cellular_component)|GO:0016481(negative regulation of transcription)	0.499005
BEX1	brain expressed, X-linked 1	GO:0005634(nucleus)|GO:0005737(cytoplasm)|GO:0007275(multicellular organismal development)|GO:0007399(nervous system development)|GO:0030154(cell differentiation)	2.11372
BNC2	basonuclin 2	GO:0003677(DNA binding)|GO:0005622(intracellular)|GO:0005634(nucleus)|GO:0005737(cytoplasm)|GO:0005886(plasma membrane)|GO:0008270(zinc ion binding)|GO:0045449(regulation of transcription)|GO:0046872(metal ion binding)	0.377966
BRI3	brain protein I3	GO:0016020(membrane)|GO:0016021(integral to membrane)	2.13766
C10orf27	chromosome 10 open reading frame 27	GO:0005515(protein binding)|GO:0005634(nucleus)|GO:0005737(cytoplasm)|GO:0005829(cytosol)|GO:0007275(multicellular organismal development)|GO:0007283(spermatogenesis)|GO:0030154(cell differentiation)	2.23282
C15orf37	chromosome 15 open reading frame 37		2.716
C16orf57	chromosome 16 open reading frame 57	GO:0003674(molecular_function)|GO:0005575(cellular_component)|GO:0008150(biological_process)	2.0558
C17orf53	chromosome 17 open reading frame 53		2.18057
C19orf38	chromosome 19 open reading frame 38	GO:0016020(membrane)|GO:0016021(integral to membrane)	2.16462
C19orf59	chromosome 19 open reading frame 59	GO:0016020(membrane)|GO:0016021(integral to membrane)	2.19857
C1orf172	chromosome 1 open reading frame 172		0.49489
C1QL1	complement component 1, q subcomponent-like 1	GO:0003674(molecular_function)|GO:0005576(extracellular region)|GO:0005737(cytoplasm)|GO:0007626(locomotory behavior)	2.06555
C1QTNF6	C1q and tumor necrosis factor related protein 6	GO:0005576(extracellular region)	0.482116
C20orf108	chromosome 20 open reading frame 108	GO:0016020(membrane)|GO:0016021(integral to membrane)	2.0487
C21orf116	chromosome 21 open reading frame 116		2.06196
C8orf83	chromosome 8 open reading frame 83	GO:0016020(membrane)|GO:0016021(integral to membrane)	2.01452
C9orf116	chromosome 9 open reading frame 116		2.04755
C9orf47	chromosome 9 open reading frame 47	GO:0005576(extracellular region)	2.17832
C9orf66	chromosome 9 open reading frame 66		2.02782
CADM1	cell adhesion molecule 1	GO:0001889(liver development)|GO:0001913(T cell mediated cytotoxicity)|GO:0005102(receptor binding)|GO:0005886(plasma membrane)|GO:0005911(cell-cell junction)|GO:0006915(apoptosis)|GO:0006955(immune response)|GO:0007155(cell adhesion)|GO:0007156(homophilic cell adhesion)|GO:0007157(heterophilic cell adhesion)|GO:0007275(multicellular organismal development)|GO:0007283(spermatogenesis)|GO:0007416(…	0.47952
CARD11	caspase recruitment domain family, member 11	GO:0001819(positive regulation of cytokine production)|GO:0004385(guanylate kinase activity)|GO:0005515(protein binding)|GO:0005622(intracellular)|GO:0005737(cytoplasm)|GO:0005829(cytosol)|GO:0005886(plasma membrane)|GO:0007165(signal transduction)|GO:0030890(positive regulation of B cell proliferation)|GO:0042101(T cell receptor complex)|GO:0042102(positive regulation of T cell proliferation)|GO…	0.47271
CARD16	caspase recruitment domain family, member 16	GO:0004197(cysteine-type endopeptidase activity)|GO:0004869(cysteine-type endopeptidase inhibitor activity)|GO:0005515(protein binding)|GO:0005622(intracellular)|GO:0006508(proteolysis)|GO:0030414(peptidase inhibitor activity)|GO:0042981(regulation of apoptosis)	2.07449
CARD6	caspase recruitment domain family, member 6	GO:0005515(protein binding)|GO:0005622(intracellular)|GO:0042981(regulation of apoptosis)	2.09264
CASP5	caspase 5, apoptosis-related cysteine peptidase	GO:0004197(cysteine-type endopeptidase activity)|GO:0005515(protein binding)|GO:0005622(intracellular)|GO:0006508(proteolysis)|GO:0008233(peptidase activity)|GO:0042981(regulation of apoptosis)	2.09933
CBX3	chromobox homolog 3 (HP1 gamma homolog, Drosophila)	GO:0000779(condensed chromosome, centromeric region)|GO:0000785(chromatin)|GO:0003682(chromatin binding)|GO:0005634(nucleus)|GO:0005635(nuclear envelope)|GO:0005637(nuclear inner membrane)|GO:0005701(polytene chromosome chromocenter)|GO:0005719(nuclear euchromatin)|GO:0005819(spindle)|GO:0006333(chromatin assembly or disassembly)|GO:0006338(chromatin remodeling)|GO:0016565(general transcriptional…	0.455851
CCNA1	cyclin A1	GO:0005515(protein binding)|GO:0005634(nucleus)|GO:0005829(cytosol)|GO:0007049(cell cycle)|GO:0007067(mitosis)|GO:0007141(male meiosis I)|GO:0007283(spermatogenesis)|GO:0015630(microtubule cytoskeleton)|GO:0051301(cell division)	2.62633
CCPG1	cell cycle progression 1	GO:0007049(cell cycle)|GO:0016020(membrane)|GO:0016021(integral to membrane)	2.18532
CCR8	chemokine (C-C motif) receptor 8	GO:0004930(G-protein coupled receptor activity)|GO:0005515(protein binding)|GO:0005886(plasma membrane)|GO:0005887(integral to plasma membrane)|GO:0006935(chemotaxis)|GO:0006955(immune response)|GO:0007155(cell adhesion)|GO:0007165(signal transduction)|GO:0007186(G-protein coupled receptor protein signaling pathway)|GO:0007204(elevation of cytosolic calcium ion concentration)|GO:0015026(corecepto…	0.481429
CCRL2	chemokine (C-C motif) receptor-like 2	GO:0004872(receptor activity)|GO:0004930(G-protein coupled receptor activity)|GO:0005886(plasma membrane)|GO:0005887(integral to plasma membrane)|GO:0006935(chemotaxis)|GO:0007165(signal transduction)|GO:0007186(G-protein coupled receptor protein signaling pathway)|GO:0016493(C-C chemokine receptor activity)	2.04003
CD163L1	CD163 molecule-like 1	GO:0005044(scavenger receptor activity)|GO:0005576(extracellular region)|GO:0005886(plasma membrane)|GO:0016021(integral to membrane)	2.2663
CD19	CD19 molecule	GO:0005057(receptor signaling protein activity)|GO:0005515(protein binding)|GO:0005886(plasma membrane)|GO:0005887(integral to plasma membrane)|GO:0006968(cellular defense response)|GO:0007166(cell surface receptor linked signal transduction)|GO:0009897(external side of plasma membrane)|GO:0050853(B cell receptor signaling pathway)	0.488147
CD22	CD22 molecule	GO:0005515(protein binding)|GO:0005529(sugar binding)|GO:0005886(plasma membrane)|GO:0005887(integral to plasma membrane)|GO:0007155(cell adhesion)|GO:0009897(external side of plasma membrane)	0.397083
CD300LF	CD300 molecule-like family member f	GO:0004872(receptor activity)|GO:0005886(plasma membrane)|GO:0006955(immune response)|GO:0016021(integral to membrane)	2.01901
CD46	CD46 molecule, complement regulatory protein	GO:0004872(receptor activity)|GO:0005886(plasma membrane)|GO:0005887(integral to plasma membrane)|GO:0006958(complement activation, classical pathway)|GO:0007338(single fertilization)|GO:0044419(interspecies interaction between organisms)|GO:0045087(innate immune response)	2.06575
CD55	CD55 molecule, decay accelerating factor for complement (Cromer blood group)	GO:0005625(soluble fraction)|GO:0005886(plasma membrane)|GO:0005887(integral to plasma membrane)|GO:0006958(complement activation, classical pathway)|GO:0007204(elevation of cytosolic calcium ion concentration)|GO:0031225(anchored to membrane)|GO:0045087(innate immune response)|GO:0045121(membrane raft)|GO:0045730(respiratory burst)	2.02731
CDT1	chromatin licensing and DNA replication factor 1	GO:0000076(DNA replication checkpoint)|GO:0003677(DNA binding)|GO:0005515(protein binding)|GO:0005634(nucleus)|GO:0005654(nucleoplasm)|GO:0006260(DNA replication)|GO:0007049(cell cycle)|GO:0007090(regulation of S phase of mitotic cell cycle)|GO:0030174(regulation of DNA replication initiation)	2.21632
CES7	carboxylesterase 7	GO:0004091(carboxylesterase activity)|GO:0005576(extracellular region)|GO:0016787(hydrolase activity)	2.20673
CHST15	carbohydrate (N-acetylgalactosamine 4-sulfate 6-O) sulfotransferase 15	GO:0005794(Golgi apparatus)|GO:0016020(membrane)|GO:0016021(integral to membrane)|GO:0016740(transferase activity)|GO:0019319(hexose biosynthetic process)|GO:0050656(3'-phosphoadenosine 5'-phosphosulfate binding)|GO:0050659(N-acetylgalactosamine 4-sulfate 6-O-sulfotransferase activity)	2.12692
CLDN9	claudin 9	GO:0005198(structural molecule activity)|GO:0005886(plasma membrane)|GO:0005923(tight junction)|GO:0016021(integral to membrane)|GO:0016338(calcium-independent cell-cell adhesion)|GO:0030054(cell junction)|GO:0042802(identical protein binding)	2.08328
CLEC12A	C-type lectin domain family 12, member A	GO:0004872(receptor activity)|GO:0005488(binding)|GO:0005529(sugar binding)|GO:0005886(plasma membrane)|GO:0016021(integral to membrane)	2.40158
CLEC12B	C-type lectin domain family 12, member B	GO:0004872(receptor activity)|GO:0005488(binding)|GO:0005529(sugar binding)|GO:0005886(plasma membrane)|GO:0016021(integral to membrane)	2.03154
CLEC1A	C-type lectin domain family 1, member A	GO:0004888(transmembrane receptor activity)|GO:0005488(binding)|GO:0005529(sugar binding)|GO:0005622(intracellular)|GO:0005887(integral to plasma membrane)|GO:0006952(defense response)|GO:0007166(cell surface receptor linked signal transduction)|GO:0016020(membrane)	2.16891
CLEC4A	C-type lectin domain family 4, member A	GO:0004888(transmembrane receptor activity)|GO:0005488(binding)|GO:0005529(sugar binding)|GO:0005887(integral to plasma membrane)|GO:0006955(immune response)|GO:0007155(cell adhesion)|GO:0007166(cell surface receptor linked signal transduction)|GO:0016020(membrane)	2.00808
CLEC4E	C-type lectin domain family 4, member E	GO:0005488(binding)|GO:0005529(sugar binding)|GO:0006955(immune response)|GO:0016020(membrane)|GO:0016021(integral to membrane)	2.21131
CLSTN2	calsyntenin 2	GO:0000139(Golgi membrane)|GO:0005509(calcium ion binding)|GO:0005515(protein binding)|GO:0005783(endoplasmic reticulum)|GO:0005789(endoplasmic reticulum membrane)|GO:0005794(Golgi apparatus)|GO:0005886(plasma membrane)|GO:0007155(cell adhesion)|GO:0007156(homophilic cell adhesion)|GO:0016021(integral to membrane)|GO:0045211(postsynaptic membrane)	2.09841
CLTCL1	clathrin, heavy chain-like 1	GO:0004871(signal transducer activity)|GO:0005198(structural molecule activity)|GO:0005515(protein binding)|GO:0006886(intracellular protein transport)|GO:0006898(receptor-mediated endocytosis)|GO:0009653(anatomical structure morphogenesis)|GO:0016020(membrane)|GO:0016192(vesicle-mediated transport)|GO:0030130(clathrin coat of trans-Golgi network vesicle)|GO:0030132(clathrin coat of coated pit)|G…	2.06619
COL19A1	collagen, type XIX, alpha 1	GO:0001501(skeletal system development)|GO:0005201(extracellular matrix structural constituent)|GO:0005576(extracellular region)|GO:0005581(collagen)|GO:0007275(multicellular organismal development)|GO:0007517(muscle organ development)|GO:0007519(skeletal muscle tissue development)|GO:0016337(cell-cell adhesion)|GO:0030154(cell differentiation)|GO:0030198(extracellular matrix organization)|GO:003…	0.311727
COX6B2	cytochrome c oxidase subunit VIb polypeptide 2 (testis)	GO:0004129(cytochrome-c oxidase activity)|GO:0005739(mitochondrion)|GO:0005758(mitochondrial intermembrane space)|GO:0030061(mitochondrial crista)	2.03426
CPD	carboxypeptidase D	GO:0004181(metallocarboxypeptidase activity)|GO:0004185(serine-type carboxypeptidase activity)|GO:0005624(membrane fraction)|GO:0005634(nucleus)|GO:0005792(microsome)|GO:0005802(trans-Golgi network)|GO:0006508(proteolysis)|GO:0008233(peptidase activity)|GO:0008237(metallopeptidase activity)|GO:0008270(zinc ion binding)|GO:0016020(membrane)|GO:0016021(integral to membrane)|GO:0046872(metal ion bin…	2.32276
CREG1	cellular repressor of E1A-stimulated genes 1	GO:0003702(RNA polymerase II transcription factor activity)|GO:0003714(transcription corepressor activity)|GO:0005576(extracellular region)|GO:0005667(transcription factor complex)|GO:0006357(regulation of transcription from RNA polymerase II promoter)|GO:0007275(multicellular organismal development)|GO:0008134(transcription factor binding)|GO:0008283(cell proliferation)|GO:0040008(regulation of …	2.15181
CSMD3	CUB and Sushi multiple domains 3	GO:0005886(plasma membrane)|GO:0016021(integral to membrane)	2.07623
CSRNP1	cysteine-serine-rich nuclear protein 1	GO:0003674(molecular_function)|GO:0003700(transcription factor activity)|GO:0005575(cellular_component)|GO:0005634(nucleus)|GO:0006355(regulation of transcription, DNA-dependent)|GO:0006915(apoptosis)|GO:0009791(post-embryonic development)|GO:0045944(positive regulation of transcription from RNA polymerase II promoter)|GO:0048008(platelet-derived growth factor receptor signaling pathway)|GO:00487…	2.04183
CTSB	cathepsin B	GO:0004197(cysteine-type endopeptidase activity)|GO:0005576(extracellular region)|GO:0005622(intracellular)|GO:0005625(soluble fraction)|GO:0005739(mitochondrion)|GO:0005764(lysosome)|GO:0006508(proteolysis)|GO:0008233(peptidase activity)|GO:0009611(response to wounding)|GO:0009897(external side of plasma membrane)|GO:0016324(apical plasma membrane)|GO:0030984(kininogen binding)|GO:0042277(peptid…	2.09706
CXCL11	chemokine (C-X-C motif) ligand 11	GO:0005576(extracellular region)|GO:0005615(extracellular space)|GO:0006935(chemotaxis)|GO:0006954(inflammatory response)|GO:0006955(immune response)|GO:0007165(signal transduction)|GO:0007186(G-protein coupled receptor protein signaling pathway)|GO:0007267(cell-cell signaling)|GO:0008009(chemokine activity)	2.12835
CYBRD1	cytochrome b reductase 1	GO:0000293(ferric-chelate reductase activity)|GO:0005506(iron ion binding)|GO:0006810(transport)|GO:0010039(response to iron ion)|GO:0016020(membrane)|GO:0016021(integral to membrane)|GO:0016491(oxidoreductase activity)|GO:0022900(electron transport chain)|GO:0031526(brush border membrane)|GO:0046872(metal ion binding)	2.04591
CYP7B1	cytochrome P450, family 7, subfamily B, polypeptide 1	GO:0004497(monooxygenase activity)|GO:0005783(endoplasmic reticulum)|GO:0005789(endoplasmic reticulum membrane)|GO:0005792(microsome)|GO:0006629(lipid metabolic process)|GO:0006699(bile acid biosynthetic process)|GO:0007623(circadian rhythm)|GO:0008202(steroid metabolic process)|GO:0008203(cholesterol metabolic process)|GO:0008219(cell death)|GO:0008396(oxysterol 7-alpha-hydroxylase activity)|GO:…	2.1636
CYP8B1	cytochrome P450, family 8, subfamily B, polypeptide 1	GO:0004497(monooxygenase activity)|GO:0005783(endoplasmic reticulum)|GO:0005789(endoplasmic reticulum membrane)|GO:0005792(microsome)|GO:0008397(sterol 12-alpha-hydroxylase activity)|GO:0009055(electron carrier activity)|GO:0016020(membrane)|GO:0016021(integral to membrane)|GO:0019825(oxygen binding)|GO:0020037(heme binding)|GO:0033778(7alpha-hydroxycholest-4-en-3-one 12alpha-hydroxylase activity…	2.31317
CYYR1	cysteine/tyrosine-rich 1	GO:0003674(molecular_function)|GO:0008150(biological_process)|GO:0016020(membrane)|GO:0016021(integral to membrane)	2.31895
DBF4	DBF4 homolog (S. cerevisiae)	GO:0000082(G1/S transition of mitotic cell cycle)|GO:0003676(nucleic acid binding)|GO:0005515(protein binding)|GO:0005622(intracellular)|GO:0005634(nucleus)|GO:0005654(nucleoplasm)|GO:0006260(DNA replication)|GO:0007049(cell cycle)|GO:0008047(enzyme activator activity)|GO:0008270(zinc ion binding)|GO:0046872(metal ion binding)	0.421139
DCAF13	DDB1 and CUL4 associated factor 13	GO:0005634(nucleus)|GO:0005730(nucleolus)|GO:0006364(rRNA processing)|GO:0030529(ribonucleoprotein complex)	0.476868
DDX3Y	DEAD (Asp-Glu-Ala-Asp) box polypeptide 3, Y-linked"	GO:0000166(nucleotide binding)|GO:0003677(DNA binding)|GO:0003723(RNA binding)|GO:0004386(helicase activity)|GO:0005524(ATP binding)|GO:0005634(nucleus)|GO:0005737(cytoplasm)|GO:0005886(plasma membrane)|GO:0008026(ATP-dependent helicase activity)|GO:0016787(hydrolase activity)	2.04632
DDX60L	DEAD (Asp-Glu-Ala-Asp) box polypeptide 60-like	GO:0000166(nucleotide binding)|GO:0003723(RNA binding)|GO:0004386(helicase activity)|GO:0005524(ATP binding)|GO:0008026(ATP-dependent helicase activity)|GO:0016787(hydrolase activity)	2.05377
DGKB	diacylglycerol kinase, beta 90kDa	GO:0000166(nucleotide binding)|GO:0004143(diacylglycerol kinase activity)|GO:0005509(calcium ion binding)|GO:0005515(protein binding)|GO:0005524(ATP binding)|GO:0005624(membrane fraction)|GO:0005737(cytoplasm)|GO:0005886(plasma membrane)|GO:0007205(activation of protein kinase C activity by G-protein coupled receptor protein signaling pathway)|GO:0007242(intracellular signaling cascade)|GO:000827…	2.05254
DHRS9	dehydrogenase/reductase (SDR family) member 9	GO:0004022(alcohol dehydrogenase (NAD) activity)|GO:0004745(retinol dehydrogenase activity)|GO:0005488(binding)|GO:0005783(endoplasmic reticulum)|GO:0005789(endoplasmic reticulum membrane)|GO:0005792(microsome)|GO:0008209(androgen metabolic process)|GO:0016020(membrane)|GO:0016491(oxidoreductase activity)|GO:0016854(racemase and epimerase activity)|GO:0030176(integral to endoplasmic reticulum mem…	2.64488
DKFZp434F142	hypothetical DKFZp434F142		2.63204
DKFZp667F0711	hypothetical protein DKFZp667F0711		2.12387
DMKN	dermokine	GO:0005576(extracellular region)|GO:0005615(extracellular space)	0.492166
DPYSL5	dihydropyrimidinase-like 5	GO:0005515(protein binding)|GO:0005737(cytoplasm)|GO:0007165(signal transduction)|GO:0007399(nervous system development)|GO:0007411(axon guidance)|GO:0016810(hydrolase activity, acting on carbon-nitrogen (but not peptide) bonds)|GO:0030182(neuron differentiation)|GO:0030425(dendrite)|GO:0043025(cell soma)|GO:0043234(protein complex)	2.10546
DSC1	desmocollin 1	GO:0005509(calcium ion binding)|GO:0005515(protein binding)|GO:0005624(membrane fraction)|GO:0005886(plasma membrane)|GO:0005921(gap junction)|GO:0007155(cell adhesion)|GO:0007156(homophilic cell adhesion)|GO:0016021(integral to membrane)|GO:0030054(cell junction)|GO:0030057(desmosome)	0.491415
DYRK2	dual-specificity tyrosine-(Y)-phosphorylation regulated kinase 2	GO:0000166(nucleotide binding)|GO:0000287(magnesium ion binding)|GO:0004674(protein serine/threonine kinase activity)|GO:0004713(protein tyrosine kinase activity)|GO:0005524(ATP binding)|GO:0005634(nucleus)|GO:0005737(cytoplasm)|GO:0006468(protein amino acid phosphorylation)|GO:0006915(apoptosis)|GO:0016740(transferase activity)|GO:0030145(manganese ion binding)|GO:0042771(DNA damage response, si…	0.495029
DZIP3	DAZ interacting protein 3, zinc finger	GO:0000209(protein polyubiquitination)|GO:0003723(RNA binding)|GO:0004842(ubiquitin-protein ligase activity)|GO:0005515(protein binding)|GO:0005737(cytoplasm)|GO:0008270(zinc ion binding)|GO:0016874(ligase activity)|GO:0019941(modification-dependent protein catabolic process)|GO:0031593(polyubiquitin binding)|GO:0046872(metal ion binding)	0.496922
ECHDC3	enoyl Coenzyme A hydratase domain containing 3	GO:0003824(catalytic activity)|GO:0005739(mitochondrion)|GO:0008152(metabolic process)	2.29725
EDIL3	EGF-like repeats and discoidin I-like domains 3	GO:0005178(integrin binding)|GO:0005509(calcium ion binding)|GO:0005515(protein binding)|GO:0005576(extracellular region)|GO:0007155(cell adhesion)|GO:0007275(multicellular organismal development)|GO:0010811(positive regulation of cell-substrate adhesion)	2.53632
EFCAB2	EF-hand calcium binding domain 2	GO:0005509(calcium ion binding)	2.17532
EFHD2	EF-hand domain family, member D2	GO:0005509(calcium ion binding)|GO:0005515(protein binding)|GO:0016020(membrane)|GO:0045121(membrane raft)	2.03184
EGLN1	egl nine homolog 1 (C. elegans)	GO:0001666(response to hypoxia)|GO:0001892(embryonic placenta development)|GO:0005506(iron ion binding)|GO:0005515(protein binding)|GO:0005829(cytosol)|GO:0007507(heart development)|GO:0008270(zinc ion binding)|GO:0016702(oxidoreductase activity, acting on single donors with incorporation of molecular oxygen, incorporation of two atoms of oxygen)|GO:0016705(oxidoreductase activity, acting on pair…	2.14484
EIF2AK2	eukaryotic translation initiation factor 2-alpha kinase 2	GO:0000166(nucleotide binding)|GO:0003725(double-stranded RNA binding)|GO:0004694(eukaryotic translation initiation factor 2alpha kinase activity)|GO:0005515(protein binding)|GO:0005524(ATP binding)|GO:0005622(intracellular)|GO:0006412(translation)|GO:0006926(virus-infected cell apoptosis)|GO:0008601(protein phosphatase type 2A regulator activity)|GO:0009615(response to virus)|GO:0016740(transfer…	2.14331
ENTPD1	ectonucleoside triphosphate diphosphohydrolase 1	GO:0000166(nucleotide binding)|GO:0000287(magnesium ion binding)|GO:0005509(calcium ion binding)|GO:0005524(ATP binding)|GO:0005886(plasma membrane)|GO:0005887(integral to plasma membrane)|GO:0007155(cell adhesion)|GO:0007596(blood coagulation)|GO:0016787(hydrolase activity)	2.0999
EOMES	eomesodermin homolog (Xenopus laevis)	GO:0001706(endoderm formation)|GO:0001707(mesoderm formation)|GO:0002302(CD8-positive, alpha-beta T cell differentiation during immune response)|GO:0003700(transcription factor activity)|GO:0005634(nucleus)|GO:0006355(regulation of transcription, DNA-dependent)|GO:0007275(multicellular organismal development)|GO:0007420(brain development)|GO:0016563(transcription activator activity)|GO:0060706(ce…	0.491623
EXOC6	exocyst complex component 6	GO:0000145(exocyst)|GO:0006904(vesicle docking during exocytosis)|GO:0015031(protein transport)	2.03135
F2RL1	coagulation factor II (thrombin) receptor-like 1	GO:0002690(positive regulation of leukocyte chemotaxis)|GO:0004872(receptor activity)|GO:0004930(G-protein coupled receptor activity)|GO:0005102(receptor binding)|GO:0005794(Golgi apparatus)|GO:0005886(plasma membrane)|GO:0005887(integral to plasma membrane)|GO:0007165(signal transduction)|GO:0007186(G-protein coupled receptor protein signaling pathway)|GO:0007204(elevation of cytosolic calcium i…	2.01454
FAM103A1	family with sequence similarity 103, member A1		2.02492
FAM126B	family with sequence similarity 126, member B	GO:0005622(intracellular)	2.35274
FAM169A	family with sequence similarity 169, member A		0.481718
FAM20A	family with sequence similarity 20, member A	GO:0005576(extracellular region)	2.33486
FAM65C	family with sequence similarity 65, member C		2.0081
FAM74A1	family with sequence similarity 74, member A1		2.16572
FAR1	fatty acyl CoA reductase 1	GO:0005515(protein binding)|GO:0005777(peroxisome)|GO:0005782(peroxisomal matrix)|GO:0008610(lipid biosynthetic process)|GO:0010025(wax biosynthetic process)|GO:0016020(membrane)|GO:0016021(integral to membrane)|GO:0016491(oxidoreductase activity)|GO:0050062(long-chain-fatty-acyl-CoA reductase activity)|GO:0055114(oxidation reduction)	2.01702
FKBP1A	FK506 binding protein 1A, 12kDa	GO:0003755(peptidyl-prolyl cis-trans isomerase activity)|GO:0004871(signal transducer activity)|GO:0005024(transforming growth factor beta receptor activity)|GO:0005219(ryanodine-sensitive calcium-release channel activity)|GO:0005528(FK506 binding)|GO:0005737(cytoplasm)|GO:0005829(cytosol)|GO:0006458('de novo' protein folding)|GO:0007183(SMAD protein complex assembly)|GO:0014802(terminal cisterna…	2.03584
FKBP9	FK506 binding protein 9, 63 kDa	GO:0003755(peptidyl-prolyl cis-trans isomerase activity)|GO:0005509(calcium ion binding)|GO:0005783(endoplasmic reticulum)|GO:0006457(protein folding)|GO:0016853(isomerase activity)	2.08334
FLJ13197	hypothetical FLJ13197		0.413913
FLJ23834	hypothetical protein FLJ23834	GO:0005509(calcium ion binding)|GO:0005515(protein binding)|GO:0005886(plasma membrane)|GO:0007155(cell adhesion)|GO:0007156(homophilic cell adhesion)|GO:0016021(integral to membrane)	0.451844
FLJ30901	hypothetical protein FLJ30901		2.37609
FLJ32742	hypothetical locus FLJ32742		2.02714
FLJ35390	hypothetical LOC255031		2.0313
FLJ35946	hypothetical protein FLJ35946		2.86789
FLJ36031	hypothetical protein FLJ36031		2.85454
FLJ36644	hypothetical protein LOC400617		3.60003
FLJ36840	hypothetical LOC645524		0.477977
FLJ38379	hypothetical FLJ38379		0.386812
FLJ45445	hypothetical LOC399844		2.4517
FLOT1	flotillin 1	GO:0005515(protein binding)|GO:0005624(membrane fraction)|GO:0005794(Golgi apparatus)|GO:0005815(microtubule organizing center)|GO:0005886(plasma membrane)|GO:0016021(integral to membrane)|GO:0016600(flotillin complex)|GO:0019898(extrinsic to membrane)|GO:0034451(centriolar satellite)|GO:0042470(melanosome)	2.03482
FLOT2	flotillin 2	GO:0005515(protein binding)|GO:0005624(membrane fraction)|GO:0005886(plasma membrane)|GO:0007155(cell adhesion)|GO:0008544(epidermis development)|GO:0009986(cell surface)|GO:0019898(extrinsic to membrane)	2.09399
FOS	FBJ murine osteosarcoma viral oncogene homolog	GO:0001661(conditioned taste aversion)|GO:0003690(double-stranded DNA binding)|GO:0003700(transcription factor activity)|GO:0003704(specific RNA polymerase II transcription factor activity)|GO:0005634(nucleus)|GO:0005667(transcription factor complex)|GO:0005730(nucleolus)|GO:0006306(DNA methylation)|GO:0006954(inflammatory response)|GO:0007179(transforming growth factor beta receptor signaling pa…	2.2336
FOSL2	FOS-like antigen 2	GO:0003700(transcription factor activity)|GO:0005634(nucleus)|GO:0005730(nucleolus)|GO:0006357(regulation of transcription from RNA polymerase II promoter)|GO:0008219(cell death)|GO:0043565(sequence-specific DNA binding)|GO:0046983(protein dimerization activity)|GO:0048146(positive regulation of fibroblast proliferation)	2.28956
FPR3	formyl peptide receptor 3	GO:0004872(receptor activity)|GO:0004930(G-protein coupled receptor activity)|GO:0004982(N-formyl peptide receptor activity)|GO:0005886(plasma membrane)|GO:0006928(cell motion)|GO:0006935(chemotaxis)|GO:0007165(signal transduction)|GO:0007186(G-protein coupled receptor protein signaling pathway)|GO:0016021(integral to membrane)	2.14287
FRAT1	frequently rearranged in advanced T-cell lymphomas	GO:0000578(embryonic axis specification)|GO:0005737(cytoplasm)|GO:0016055(Wnt receptor signaling pathway)	2.03061
FRRS1	ferric-chelate reductase 1	GO:0000293(ferric-chelate reductase activity)|GO:0004500(dopamine beta-monooxygenase activity)|GO:0005506(iron ion binding)|GO:0006548(histidine catabolic process)|GO:0006810(transport)|GO:0016020(membrane)|GO:0016021(integral to membrane)|GO:0016491(oxidoreductase activity)|GO:0022900(electron transport chain)|GO:0046872(metal ion binding)	0.445447
FZD5	frizzled homolog 5 (Drosophila)	GO:0004926(non-G-protein coupled 7TM receptor activity)|GO:0004930(G-protein coupled receptor activity)|GO:0005515(protein binding)|GO:0005794(Golgi apparatus)|GO:0005886(plasma membrane)|GO:0005887(integral to plasma membrane)|GO:0007164(establishment of tissue polarity)|GO:0007186(G-protein coupled receptor protein signaling pathway)|GO:0007275(multicellular organismal development)|GO:0016055(W…	2.0369
GAB2	GRB2-associated binding protein 2		2.20559
GAS7	growth arrest-specific 7	GO:0001726(ruffle)|GO:0003700(transcription factor activity)|GO:0005515(protein binding)|GO:0005737(cytoplasm)|GO:0005884(actin filament)|GO:0007050(cell cycle arrest)|GO:0007275(multicellular organismal development)|GO:0007399(nervous system development)|GO:0008360(regulation of cell shape)|GO:0030041(actin filament polymerization)|GO:0030182(neuron differentiation)|GO:0048812(neuron projection …	2.1998
GFPT2	glutamine-fructose-6-phosphate transaminase 2	GO:0004360(glutamine-fructose-6-phosphate transaminase (isomerizing) activity)|GO:0005529(sugar binding)|GO:0005737(cytoplasm)|GO:0006002(fructose 6-phosphate metabolic process)|GO:0006112(energy reserve metabolic process)|GO:0006541(glutamine metabolic process)|GO:0008152(metabolic process)|GO:0016051(carbohydrate biosynthetic process)|GO:0016740(transferase activity)	0.353422
GGTLC2	gamma-glutamyltransferase light chain 2	GO:0003840(gamma-glutamyltransferase activity)|GO:0005575(cellular_component)|GO:0006750(glutathione biosynthetic process)	2.09053
GHRL	ghrelin/obestatin prepropeptide	GO:0000187(activation of MAPK activity)|GO:0001696(gastric acid secretion)|GO:0001937(negative regulation of endothelial cell proliferation)|GO:0005576(extracellular region)|GO:0005615(extracellular space)|GO:0005737(cytoplasm)|GO:0006006(glucose metabolic process)|GO:0006916(anti-apoptosis)|GO:0007186(G-protein coupled receptor protein signaling pathway)|GO:0007204(elevation of cytosolic calcium…	2.0949
GJD3	gap junction protein, delta 3, 31.9kDa	GO:0005515(protein binding)|GO:0005886(plasma membrane)|GO:0005887(integral to plasma membrane)|GO:0005922(connexon complex)|GO:0007154(cell communication)|GO:0009986(cell surface)|GO:0016264(gap junction assembly)|GO:0030054(cell junction)	2.14268
GK2	glycerol kinase 2	GO:0000166(nucleotide binding)|GO:0004370(glycerol kinase activity)|GO:0005524(ATP binding)|GO:0005737(cytoplasm)|GO:0005739(mitochondrion)|GO:0005741(mitochondrial outer membrane)|GO:0005975(carbohydrate metabolic process)|GO:0006072(glycerol-3-phosphate metabolic process)|GO:0016020(membrane)|GO:0016740(transferase activity)	2.48784
GLUL	glutamate-ammonia ligase (glutamine synthetase)	GO:0000166(nucleotide binding)|GO:0004356(glutamate-ammonia ligase activity)|GO:0005524(ATP binding)|GO:0005622(intracellular)|GO:0005737(cytoplasm)|GO:0005739(mitochondrion)|GO:0005794(Golgi apparatus)|GO:0005829(cytosol)|GO:0006542(glutamine biosynthetic process)|GO:0006807(nitrogen compound metabolic process)|GO:0008283(cell proliferation)|GO:0009749(response to glucose stimulus)|GO:0016874(li…	2.04312
GNB4	guanine nucleotide binding protein (G protein), beta polypeptide 4	GO:0004871(signal transducer activity)|GO:0007165(signal transduction)|GO:0009755(hormone-mediated signaling pathway)	2.24962
GNG2	guanine nucleotide binding protein (G protein), gamma 2	GO:0004871(signal transducer activity)|GO:0005794(Golgi apparatus)|GO:0005834(heterotrimeric G-protein complex)|GO:0005886(plasma membrane)|GO:0007165(signal transduction)|GO:0007186(G-protein coupled receptor protein signaling pathway)|GO:0008283(cell proliferation)|GO:0009755(hormone-mediated signaling pathway)	2.05217
GOLGA2LY1	golgi autoantigen, golgin subfamily a, 2-like, Y-linked 1		0.491675
GPR115	G protein-coupled receptor 115	GO:0004930(G-protein coupled receptor activity)|GO:0005886(plasma membrane)|GO:0007218(neuropeptide signaling pathway)|GO:0016021(integral to membrane)	2.12715
GPR123	G protein-coupled receptor 123	GO:0004930(G-protein coupled receptor activity)|GO:0005886(plasma membrane)|GO:0007186(G-protein coupled receptor protein signaling pathway)|GO:0016021(integral to membrane)	2.0229
GPR37L1	G protein-coupled receptor 37 like 1	GO:0004872(receptor activity)|GO:0004930(G-protein coupled receptor activity)|GO:0005886(plasma membrane)|GO:0007165(signal transduction)|GO:0007186(G-protein coupled receptor protein signaling pathway)|GO:0008150(biological_process)|GO:0016021(integral to membrane)	2.16278
GPR45	G protein-coupled receptor 45	GO:0004872(receptor activity)|GO:0004930(G-protein coupled receptor activity)|GO:0005515(protein binding)|GO:0005886(plasma membrane)|GO:0007165(signal transduction)|GO:0007186(G-protein coupled receptor protein signaling pathway)|GO:0016021(integral to membrane)	2.106
GRIN3A	glutamate receptor, ionotropic, N-methyl-D-aspartate 3A	GO:0000287(magnesium ion binding)|GO:0004872(receptor activity)|GO:0004972(N-methyl-D-aspartate selective glutamate receptor activity)|GO:0005216(ion channel activity)|GO:0005234(extracellular-glutamate-gated ion channel activity)|GO:0005262(calcium channel activity)|GO:0005509(calcium ion binding)|GO:0005886(plasma membrane)|GO:0006811(ion transport)|GO:0006816(calcium ion transport)|GO:0014069(…	2.03567
GRIN3B	glutamate receptor, ionotropic, N-methyl-D-aspartate 3B	GO:0000287(magnesium ion binding)|GO:0004970(ionotropic glutamate receptor activity)|GO:0005234(extracellular-glutamate-gated ion channel activity)|GO:0005262(calcium channel activity)|GO:0005509(calcium ion binding)|GO:0005886(plasma membrane)|GO:0006811(ion transport)|GO:0016021(integral to membrane)|GO:0016594(glycine binding)|GO:0017146(N-methyl-D-aspartate selective glutamate receptor comple…	2.22921
GSTM4	glutathione S-transferase mu 4	GO:0004364(glutathione transferase activity)|GO:0005737(cytoplasm)|GO:0008152(metabolic process)|GO:0016740(transferase activity)	2.11871
GTF2IRD1	GTF2I repeat domain containing 1	GO:0003705(RNA polymerase II transcription factor activity, enhancer binding)|GO:0005515(protein binding)|GO:0005634(nucleus)|GO:0006355(regulation of transcription, DNA-dependent)|GO:0007275(multicellular organismal development)	0.405551
GUCY2G	guanylate cyclase 2G homolog (mouse) pseudogene		2.01404
GULP1	GULP, engulfment adaptor PTB domain containing 1	GO:0004871(signal transducer activity)|GO:0005515(protein binding)|GO:0005737(cytoplasm)|GO:0006869(lipid transport)|GO:0006911(phagocytosis, engulfment)|GO:0006915(apoptosis)	2.05189
GYG1	glycogenin 1	GO:0005515(protein binding)|GO:0005536(glucose binding)|GO:0005625(soluble fraction)|GO:0005829(cytosol)|GO:0005978(glycogen biosynthetic process)|GO:0008466(glycogenin glucosyltransferase activity)|GO:0016757(transferase activity, transferring glycosyl groups)	2.32372
GYG2	glycogenin 2	GO:0005625(soluble fraction)|GO:0005829(cytosol)|GO:0005978(glycogen biosynthetic process)|GO:0008466(glycogenin glucosyltransferase activity)|GO:0016757(transferase activity, transferring glycosyl groups)	2.29991
HAL	histidine ammonia-lyase	GO:0004397(histidine ammonia-lyase activity)|GO:0005625(soluble fraction)|GO:0005737(cytoplasm)|GO:0005829(cytosol)|GO:0006548(histidine catabolic process)|GO:0009058(biosynthetic process)|GO:0016211(ammonia ligase activity)|GO:0016829(lyase activity)	2.26929
HECW2	HECT, C2 and WW domain containing E3 ubiquitin protein ligase 2	GO:0005515(protein binding)|GO:0005622(intracellular)|GO:0005737(cytoplasm)|GO:0006464(protein modification process)|GO:0016874(ligase activity)|GO:0016881(acid-amino acid ligase activity)|GO:0019941(modification-dependent protein catabolic process)	2.0193
HEMGN	hemogen	GO:0005634(nucleus)|GO:0005654(nucleoplasm)|GO:0007275(multicellular organismal development)|GO:0030154(cell differentiation)|GO:0045667(regulation of osteoblast differentiation)	2.04398
HERV-V1	hypothetical LOC147664		2.17936
HIP1R	huntingtin interacting protein 1 related	GO:0003779(actin binding)|GO:0005515(protein binding)|GO:0005624(membrane fraction)|GO:0005737(cytoplasm)|GO:0005856(cytoskeleton)|GO:0005905(coated pit)|GO:0006898(receptor-mediated endocytosis)|GO:0008150(biological_process)|GO:0016020(membrane)|GO:0030665(clathrin coated vesicle membrane)|GO:0031410(cytoplasmic vesicle)|GO:0035091(phosphoinositide binding)|GO:0048471(perinuclear region of cyto…	0.476494
HIST1H3C	histone cluster 1, H3c		2.02208
HIST1H3I	histone cluster 1, H3i		2.11211
HIST2H2AA4	histone cluster 2, H2aa4		2.18969
HLA-DQA1	major histocompatibility complex, class II, DQ alpha 1	GO:0002504(antigen processing and presentation of peptide or polysaccharide antigen via MHC class II)|GO:0005886(plasma membrane)|GO:0005887(integral to plasma membrane)|GO:0006955(immune response)|GO:0016020(membrane)|GO:0016021(integral to membrane)|GO:0032395(MHC class II receptor activity)|GO:0042613(MHC class II protein complex)	0.231407
HSDL2	hydroxysteroid dehydrogenase like 2	GO:0005488(binding)|GO:0005498(sterol carrier activity)|GO:0005739(mitochondrion)|GO:0016491(oxidoreductase activity)|GO:0055114(oxidation reduction)	2.08129
HSPB3	heat shock 27kDa protein 3	GO:0006986(response to unfolded protein)|GO:0009408(response to heat)	2.04448
ICAM1	intercellular adhesion molecule 1	GO:0001772(immunological synapse)|GO:0001910(regulation of leukocyte mediated cytotoxicity)|GO:0002291(T cell activation via T cell receptor contact with antigen bound to MHC molecule on antigen presenting cell)|GO:0002457(T cell antigen processing and presentation)|GO:0002693(positive regulation of cellular extravasation)|GO:0004888(transmembrane receptor activity)|GO:0005178(integrin binding)|G…	2.17541
IFNGR2	interferon gamma receptor 2 (interferon gamma transducer 1)	GO:0004872(receptor activity)|GO:0004906(interferon-gamma receptor activity)|GO:0005783(endoplasmic reticulum)|GO:0005886(plasma membrane)|GO:0005887(integral to plasma membrane)|GO:0007166(cell surface receptor linked signal transduction)|GO:0009615(response to virus)	2.24964
IL22RA2	interleukin 22 receptor, alpha 2	GO:0004872(receptor activity)|GO:0005515(protein binding)|GO:0005576(extracellular region)|GO:0005615(extracellular space)|GO:0005829(cytosol)|GO:0042018(interleukin-22 receptor activity)|GO:0042516(regulation of tyrosine phosphorylation of Stat3 protein)	2.25108
IP6K3	inositol hexakisphosphate kinase 3	GO:0000166(nucleotide binding)|GO:0004428(inositol or phosphatidylinositol kinase activity)|GO:0005524(ATP binding)|GO:0005634(nucleus)|GO:0005737(cytoplasm)|GO:0006468(protein amino acid phosphorylation)|GO:0008440(inositol trisphosphate 3-kinase activity)|GO:0016740(transferase activity)|GO:0046488(phosphatidylinositol metabolic process)	2.0171
IRAK3	interleukin-1 receptor-associated kinase 3	GO:0000166(nucleotide binding)|GO:0000287(magnesium ion binding)|GO:0001960(negative regulation of cytokine-mediated signaling pathway)|GO:0002719(negative regulation of cytokine production during immune response)|GO:0002755(MyD88-dependent toll-like receptor signaling pathway)|GO:0004674(protein serine/threonine kinase activity)|GO:0005524(ATP binding)|GO:0005634(nucleus)|GO:0005737(cytoplasm)|G…	2.05607
IRF2BP1	interferon regulatory factor 2 binding protein 1	GO:0005634(nucleus)|GO:0045449(regulation of transcription)	3.54221
IRX6	iroquois homeobox 6	GO:0003700(transcription factor activity)|GO:0005634(nucleus)|GO:0006355(regulation of transcription, DNA-dependent)|GO:0043565(sequence-specific DNA binding)	2.01885
ISL2	ISL LIM homeobox 2	GO:0003700(transcription factor activity)|GO:0005634(nucleus)|GO:0006355(regulation of transcription, DNA-dependent)|GO:0007275(multicellular organismal development)|GO:0008270(zinc ion binding)|GO:0021524(visceral motor neuron differentiation)|GO:0031290(retinal ganglion cell axon guidance)|GO:0043565(sequence-specific DNA binding)|GO:0045665(negative regulation of neuron differentiation)|GO:004…	2.51648
ITGAX	integrin, alpha X (complement component 3 receptor 4 subunit)	GO:0000287(magnesium ion binding)|GO:0004872(receptor activity)|GO:0005509(calcium ion binding)|GO:0005515(protein binding)|GO:0007155(cell adhesion)|GO:0007229(integrin-mediated signaling pathway)|GO:0008305(integrin complex)|GO:0009887(organ morphogenesis)|GO:0009897(external side of plasma membrane)|GO:0016020(membrane)|GO:0016021(integral to membrane)	2.12573
JAG1	jagged 1 (Alagille syndrome)	GO:0001525(angiogenesis)|GO:0001709(cell fate determination)|GO:0002011(morphogenesis of an epithelial sheet)|GO:0005112(Notch binding)|GO:0005198(structural molecule activity)|GO:0005509(calcium ion binding)|GO:0005515(protein binding)|GO:0005576(extracellular region)|GO:0005886(plasma membrane)|GO:0005887(integral to plasma membrane)|GO:0007154(cell communication)|GO:0007275(multicellular organ…	2.03115
JAK2	Janus kinase 2	GO:0000166(nucleotide binding)|GO:0000186(activation of MAPKK activity)|GO:0004715(non-membrane spanning protein tyrosine kinase activity)|GO:0004718(Janus kinase activity)|GO:0005131(growth hormone receptor binding)|GO:0005143(interleukin-12 receptor binding)|GO:0005524(ATP binding)|GO:0005624(membrane fraction)|GO:0005634(nucleus)|GO:0005737(cytoplasm)|GO:0005829(cytosol)|GO:0005856(cytoskeleto…	2.04694
JAKMIP2	janus kinase and microtubule interacting protein 2	GO:0005794(Golgi apparatus)	0.480199
KCNE1	potassium voltage-gated channel, Isk-related family, member 1	GO:0002070(epithelial cell maturation)|GO:0005244(voltage-gated ion channel activity)|GO:0005251(delayed rectifier potassium channel activity)|GO:0005764(lysosome)|GO:0005886(plasma membrane)|GO:0006811(ion transport)|GO:0006813(potassium ion transport)|GO:0006936(muscle contraction)|GO:0007605(sensory perception of sound)|GO:0008015(blood circulation)|GO:0008016(regulation of heart contraction)|…	2.2048
KCNE3	potassium voltage-gated channel, Isk-related family, member 3	GO:0005244(voltage-gated ion channel activity)|GO:0005249(voltage-gated potassium channel activity)|GO:0006811(ion transport)|GO:0015459(potassium channel regulator activity)|GO:0016020(membrane)|GO:0016021(integral to membrane)|GO:0030955(potassium ion binding)|GO:0043266(regulation of potassium ion transport)	2.02186
KCNK3	potassium channel, subfamily K, member 3	GO:0005244(voltage-gated ion channel activity)|GO:0005267(potassium channel activity)|GO:0005515(protein binding)|GO:0005887(integral to plasma membrane)|GO:0006811(ion transport)|GO:0006813(potassium ion transport)|GO:0007268(synaptic transmission)|GO:0016020(membrane)|GO:0030955(potassium ion binding)	2.25552
KDM6B	lysine (K)-specific demethylase 6B	GO:0000122(negative regulation of transcription from RNA polymerase II promoter)|GO:0005488(binding)|GO:0005506(iron ion binding)|GO:0005634(nucleus)|GO:0006954(inflammatory response)|GO:0016491(oxidoreductase activity)|GO:0016568(chromatin modification)|GO:0016577(histone demethylation)|GO:0016702(oxidoreductase activity, acting on single donors with incorporation of molecular oxygen, incorporat…	2.03446
KDR	kinase insert domain receptor (a type III receptor tyrosine kinase)	GO:0000166(nucleotide binding)|GO:0001525(angiogenesis)|GO:0001541(ovarian follicle development)|GO:0001570(vasculogenesis)|GO:0002053(positive regulation of mesenchymal cell proliferation)|GO:0004872(receptor activity)|GO:0005021(vascular endothelial growth factor receptor activity)|GO:0005524(ATP binding)|GO:0005887(integral to plasma membrane)|GO:0006468(protein amino acid phosphorylation)|GO:…	2.07011
KIF13A	kinesin family member 13A	GO:0000166(nucleotide binding)|GO:0003777(microtubule motor activity)|GO:0005515(protein binding)|GO:0005524(ATP binding)|GO:0005874(microtubule)|GO:0007018(microtubule-based movement)|GO:0015031(protein transport)	0.456514
KIF15	kinesin family member 15	GO:0000166(nucleotide binding)|GO:0003677(DNA binding)|GO:0003777(microtubule motor activity)|GO:0005524(ATP binding)|GO:0005737(cytoplasm)|GO:0005813(centrosome)|GO:0005819(spindle)|GO:0005873(plus-end kinesin complex)|GO:0005874(microtubule)|GO:0007018(microtubule-based movement)|GO:0007067(mitosis)|GO:0008283(cell proliferation)	0.47458
KIF1B	kinesin family member 1B	GO:0000166(nucleotide binding)|GO:0003777(microtubule motor activity)|GO:0005515(protein binding)|GO:0005524(ATP binding)|GO:0005737(cytoplasm)|GO:0005739(mitochondrion)|GO:0005856(cytoskeleton)|GO:0005874(microtubule)|GO:0005875(microtubule associated complex)|GO:0007018(microtubule-based movement)|GO:0007270(nerve-nerve synaptic transmission)|GO:0007274(neuromuscular synaptic transmission)|GO:0…	0.488438
KIF26B	kinesin family member 26B	GO:0000166(nucleotide binding)|GO:0003777(microtubule motor activity)|GO:0005524(ATP binding)|GO:0005874(microtubule)|GO:0007018(microtubule-based movement)	0.471245
KL	klotho	GO:0002526(acute inflammatory response)|GO:0004566(beta-glucuronidase activity)|GO:0004871(signal transducer activity)|GO:0005179(hormone activity)|GO:0005499(vitamin D binding)|GO:0005515(protein binding)|GO:0005576(extracellular region)|GO:0005615(extracellular space)|GO:0005624(membrane fraction)|GO:0005625(soluble fraction)|GO:0005886(plasma membrane)|GO:0005887(integral to plasma membrane)|G…	0.402203
KLF12	Kruppel-like factor 12	GO:0000122(negative regulation of transcription from RNA polymerase II promoter)|GO:0003700(transcription factor activity)|GO:0003714(transcription corepressor activity)|GO:0005622(intracellular)|GO:0005634(nucleus)|GO:0008270(zinc ion binding)|GO:0045944(positive regulation of transcription from RNA polymerase II promoter)|GO:0046872(metal ion binding)	2.33952
KLRC1	killer cell lectin-like receptor subfamily C, member 1	GO:0004888(transmembrane receptor activity)|GO:0005488(binding)|GO:0005529(sugar binding)|GO:0005886(plasma membrane)|GO:0005887(integral to plasma membrane)|GO:0007166(cell surface receptor linked signal transduction)	2.16007
KRT77	keratin 77	GO:0005198(structural molecule activity)|GO:0005575(cellular_component)|GO:0008150(biological_process)|GO:0045095(keratin filament)	2.87378
KRTAP8-1	keratin associated protein 8-1	GO:0005882(intermediate filament)	0.440265
LAMA3	laminin, alpha 3	GO:0005102(receptor binding)|GO:0005198(structural molecule activity)|GO:0005576(extracellular region)|GO:0005604(basement membrane)|GO:0005606(laminin-1 complex)|GO:0008544(epidermis development)|GO:0030155(regulation of cell adhesion)|GO:0030334(regulation of cell migration)|GO:0045995(regulation of embryonic development)	0.494087
LASS3	LAG1 homolog, ceramide synthase 3	GO:0003700(transcription factor activity)|GO:0005634(nucleus)|GO:0005737(cytoplasm)|GO:0006355(regulation of transcription, DNA-dependent)|GO:0008610(lipid biosynthetic process)|GO:0016020(membrane)|GO:0016021(integral to membrane)|GO:0030148(sphingolipid biosynthetic process)|GO:0043565(sequence-specific DNA binding)|GO:0050291(sphingosine N-acyltransferase activity)	2.47434
LENG9	leukocyte receptor cluster (LRC) member 9	GO:0003676(nucleic acid binding)|GO:0003824(catalytic activity)|GO:0005622(intracellular)|GO:0008270(zinc ion binding)|GO:0016070(RNA metabolic process)|GO:0046872(metal ion binding)	0.4956
LILRA4	leukocyte immunoglobulin-like receptor, subfamily A (with TM domain), member 4	GO:0004872(receptor activity)|GO:0006955(immune response)|GO:0016020(membrane)|GO:0016021(integral to membrane)	0.499862
LILRB5	leukocyte immunoglobulin-like receptor, subfamily B (with TM and ITIM domains), member 5	GO:0004888(transmembrane receptor activity)|GO:0006952(defense response)|GO:0006955(immune response)|GO:0007166(cell surface receptor linked signal transduction)|GO:0016020(membrane)|GO:0016021(integral to membrane)	0.450739
LILRP2	leukocyte immunoglobulin-like receptor pseudogene 2		0.456337
LIN9	lin-9 homolog (C. elegans)	GO:0005634(nucleus)|GO:0005654(nucleoplasm)|GO:0006260(DNA replication)|GO:0007049(cell cycle)	0.480755
LIPH	lipase, member H	GO:0005576(extracellular region)|GO:0016020(membrane)|GO:0016042(lipid catabolic process)|GO:0016787(hydrolase activity)|GO:0019898(extrinsic to membrane)	0.473526
LRRC56	leucine rich repeat containing 56	GO:0005515(protein binding)	0.441568
LRRN1	leucine rich repeat neuronal 1	GO:0005515(protein binding)|GO:0016020(membrane)|GO:0016021(integral to membrane)	2.17208
LST1	leukocyte specific transcript 1	GO:0000902(cell morphogenesis)|GO:0003674(molecular_function)|GO:0005515(protein binding)|GO:0005737(cytoplasm)|GO:0005794(Golgi apparatus)|GO:0006955(immune response)|GO:0008360(regulation of cell shape)|GO:0009653(anatomical structure morphogenesis)|GO:0016020(membrane)|GO:0016021(integral to membrane)|GO:0016358(dendrite development)|GO:0050672(negative regulation of lymphocyte proliferation)	2.05103
LTA	lymphotoxin alpha (TNF superfamily, member 1)	GO:0005125(cytokine activity)|GO:0005164(tumor necrosis factor receptor binding)|GO:0005576(extracellular region)|GO:0005615(extracellular space)|GO:0006917(induction of apoptosis)|GO:0006959(humoral immune response)|GO:0007165(signal transduction)|GO:0007267(cell-cell signaling)|GO:0007584(response to nutrient)|GO:0016020(membrane)|GO:0032496(response to lipopolysaccharide)|GO:0048147(negative r…	2.04467
LY6G6F	lymphocyte antigen 6 complex, locus G6F	GO:0005886(plasma membrane)|GO:0016021(integral to membrane)	2.03135
LYZL6	lysozyme-like 6	GO:0003796(lysozyme activity)|GO:0005576(extracellular region)|GO:0008152(metabolic process)|GO:0016798(hydrolase activity, acting on glycosyl bonds)|GO:0016998(cell wall macromolecule catabolic process)	2.30445
MAP3K15	mitogen-activated protein kinase kinase kinase 15	GO:0000166(nucleotide binding)|GO:0000287(magnesium ion binding)|GO:0004674(protein serine/threonine kinase activity)|GO:0004709(MAP kinase kinase kinase activity)|GO:0005524(ATP binding)|GO:0006468(protein amino acid phosphorylation)|GO:0016740(transferase activity)	0.494245
MAP3K2	mitogen-activated protein kinase kinase kinase 2	GO:0000166(nucleotide binding)|GO:0000287(magnesium ion binding)|GO:0004674(protein serine/threonine kinase activity)|GO:0004709(MAP kinase kinase kinase activity)|GO:0005515(protein binding)|GO:0005524(ATP binding)|GO:0005634(nucleus)|GO:0005737(cytoplasm)|GO:0005829(cytosol)|GO:0007257(activation of JUN kinase activity)|GO:0016740(transferase activity)	2.01484
MARCKS	myristoylated alanine-rich protein kinase C substrate	GO:0005080(protein kinase C binding)|GO:0005516(calmodulin binding)|GO:0005737(cytoplasm)|GO:0005813(centrosome)|GO:0005938(cell cortex)|GO:0015629(actin cytoskeleton)|GO:0016020(membrane)|GO:0031225(anchored to membrane)|GO:0042585(germinal vesicle)|GO:0051015(actin filament binding)	2.39186
MCL1	myeloid cell leukemia sequence 1 (BCL2-related)	GO:0001709(cell fate determination)|GO:0005515(protein binding)|GO:0005634(nucleus)|GO:0005654(nucleoplasm)|GO:0005737(cytoplasm)|GO:0005739(mitochondrion)|GO:0005741(mitochondrial outer membrane)|GO:0006916(anti-apoptosis)|GO:0007275(multicellular organismal development)|GO:0015266(protein channel activity)|GO:0016020(membrane)|GO:0016021(integral to membrane)|GO:0019725(cellular homeostasis)|GO…	2.21925
MCM3APAS	MCM3AP antisense RNA (non-protein coding)		0.475154
MCTP1	multiple C2 domains, transmembrane 1	GO:0005509(calcium ion binding)|GO:0005544(calcium-dependent phospholipid binding)|GO:0005624(membrane fraction)|GO:0016020(membrane)|GO:0016021(integral to membrane)|GO:0019722(calcium-mediated signaling)	2.0368
MEGF9	multiple EGF-like-domains 9	GO:0004872(receptor activity)|GO:0005509(calcium ion binding)|GO:0005575(cellular_component)|GO:0008150(biological_process)|GO:0016020(membrane)|GO:0016021(integral to membrane)	2.18233
MEP1B	meprin A, beta	GO:0004222(metalloendopeptidase activity)|GO:0005615(extracellular space)|GO:0005624(membrane fraction)|GO:0005886(plasma membrane)|GO:0005887(integral to plasma membrane)|GO:0006508(proteolysis)|GO:0007586(digestion)|GO:0008233(peptidase activity)|GO:0008270(zinc ion binding)|GO:0046872(metal ion binding)	0.415746
MESTIT1	MEST intronic transcript 1 (non-protein coding)		2.15708
MFSD10	major facilitator superfamily domain containing 10	GO:0006915(apoptosis)|GO:0008493(tetracycline transporter activity)|GO:0016020(membrane)|GO:0016021(integral to membrane)|GO:0055085(transmembrane transport)	2.16377
MGC24103	hypothetical MGC24103		0.386156
MGC24125	hypothetical protein MGC24125		2.15823
MGC42105	serine/threonine-protein kinase NIM1	GO:0000166(nucleotide binding)|GO:0000287(magnesium ion binding)|GO:0004674(protein serine/threonine kinase activity)|GO:0005524(ATP binding)|GO:0006468(protein amino acid phosphorylation)|GO:0016740(transferase activity)	2.1725
MGC4473	hypothetical LOC79100		2.89166
MLL	myeloid/lymphoid or mixed-lineage leukemia (trithorax homolog, Drosophila)	GO:0003682(chromatin binding)|GO:0003700(transcription factor activity)|GO:0003702(RNA polymerase II transcription factor activity)|GO:0006306(DNA methylation)|GO:0006355(regulation of transcription, DNA-dependent)|GO:0006461(protein complex assembly)|GO:0006915(apoptosis)|GO:0008168(methyltransferase activity)|GO:0008270(zinc ion binding)|GO:0008285(negative regulation of cell proliferation)|GO:…	0.49464
MMP17	matrix metallopeptidase 17 (membrane-inserted)	GO:0004222(metalloendopeptidase activity)|GO:0005509(calcium ion binding)|GO:0005576(extracellular region)|GO:0005578(proteinaceous extracellular matrix)|GO:0005886(plasma membrane)|GO:0005887(integral to plasma membrane)|GO:0006508(proteolysis)|GO:0008047(enzyme activator activity)|GO:0008152(metabolic process)|GO:0008233(peptidase activity)|GO:0008270(zinc ion binding)|GO:0031225(anchored to me…	2.00897
MMRN1	multimerin 1	GO:0005576(extracellular region)|GO:0007155(cell adhesion)|GO:0007596(blood coagulation)|GO:0031093(platelet alpha granule lumen)	2.05215
MOSPD2	motile sperm domain containing 2	GO:0005198(structural molecule activity)|GO:0005783(endoplasmic reticulum)|GO:0005886(plasma membrane)|GO:0016021(integral to membrane)	2.06678
MPZL2	myelin protein zero-like 2	GO:0005515(protein binding)|GO:0005856(cytoskeleton)|GO:0007155(cell adhesion)|GO:0007156(homophilic cell adhesion)|GO:0009653(anatomical structure morphogenesis)|GO:0016020(membrane)|GO:0016021(integral to membrane)	2.00473
MRAP	melanocortin 2 receptor accessory protein	GO:0005737(cytoplasm)|GO:0005783(endoplasmic reticulum)|GO:0005886(plasma membrane)|GO:0016021(integral to membrane)|GO:0048471(perinuclear region of cytoplasm)	2.15531
MS4A6A	membrane-spanning 4-domains, subfamily A, member 6A	GO:0004872(receptor activity)|GO:0007165(signal transduction)|GO:0016020(membrane)|GO:0016021(integral to membrane)	2.06609
MSL1	male-specific lethal 1 homolog (Drosophila)	GO:0005634(nucleus)|GO:0016568(chromatin modification)	2.18566
MUC7	mucin 7, secreted	GO:0005515(protein binding)|GO:0005576(extracellular region)	2.17039
MX2	myxovirus (influenza virus) resistance 2 (mouse)	GO:0000166(nucleotide binding)|GO:0003924(GTPase activity)|GO:0005525(GTP binding)|GO:0005634(nucleus)|GO:0005737(cytoplasm)|GO:0006952(defense response)|GO:0009615(response to virus)	2.06351
MYH2	myosin, heavy chain 2, skeletal muscle, adult	GO:0000146(microfilament motor activity)|GO:0000166(nucleotide binding)|GO:0001778(plasma membrane repair)|GO:0003779(actin binding)|GO:0005516(calmodulin binding)|GO:0005524(ATP binding)|GO:0005730(nucleolus)|GO:0005737(cytoplasm)|GO:0005794(Golgi apparatus)|GO:0005826(actomyosin contractile ring)|GO:0005859(muscle myosin complex)|GO:0005925(focal adhesion)|GO:0008307(structural constituent of m…	2.15629
MYH7	myosin, heavy chain 7, cardiac muscle, beta	GO:0000146(microfilament motor activity)|GO:0000166(nucleotide binding)|GO:0000302(response to reactive oxygen species)|GO:0002027(regulation of heart rate)|GO:0003779(actin binding)|GO:0005516(calmodulin binding)|GO:0005524(ATP binding)|GO:0005634(nucleus)|GO:0005730(nucleolus)|GO:0005737(cytoplasm)|GO:0005859(muscle myosin complex)|GO:0005925(focal adhesion)|GO:0006200(ATP catabolic process)|GO…	2.30375
MYO10	myosin X	GO:0000166(nucleotide binding)|GO:0003774(motor activity)|GO:0003779(actin binding)|GO:0005524(ATP binding)|GO:0005856(cytoskeleton)|GO:0007165(signal transduction)|GO:0016459(myosin complex)	2.02375
MYO7B	myosin VIIB	GO:0000166(nucleotide binding)|GO:0003774(motor activity)|GO:0003779(actin binding)|GO:0005524(ATP binding)|GO:0005856(cytoskeleton)|GO:0005886(plasma membrane)|GO:0016324(apical plasma membrane)|GO:0016459(myosin complex)	2.08202
MYOF	myoferlin	GO:0005515(protein binding)|GO:0005634(nucleus)|GO:0005635(nuclear envelope)|GO:0005813(centrosome)|GO:0005886(plasma membrane)|GO:0006936(muscle contraction)|GO:0008015(blood circulation)|GO:0016021(integral to membrane)|GO:0031410(cytoplasmic vesicle)|GO:0034605(cellular response to heat)	2.09055
N4BP1	NEDD4 binding protein 1	GO:0005634(nucleus)	2.02235
NADK	NAD kinase	GO:0000166(nucleotide binding)|GO:0003951(NAD+ kinase activity)|GO:0005515(protein binding)|GO:0005524(ATP binding)|GO:0005829(cytosol)|GO:0008152(metabolic process)|GO:0016310(phosphorylation)|GO:0016740(transferase activity)|GO:0019674(NAD metabolic process)|GO:0046034(ATP metabolic process)|GO:0046872(metal ion binding)	2.15544
NFIB	nuclear factor I/B	GO:0003700(transcription factor activity)|GO:0005622(intracellular)|GO:0005634(nucleus)|GO:0005730(nucleolus)|GO:0006260(DNA replication)|GO:0006355(regulation of transcription, DNA-dependent)	2.07466
NHLH1	nescient helix loop helix 1	GO:0003677(DNA binding)|GO:0005634(nucleus)|GO:0007275(multicellular organismal development)|GO:0007417(central nervous system development)|GO:0030154(cell differentiation)|GO:0030528(transcription regulator activity)|GO:0045449(regulation of transcription)	2.70587
NINJ1	ninjurin 1	GO:0005515(protein binding)|GO:0007155(cell adhesion)|GO:0007399(nervous system development)|GO:0016020(membrane)|GO:0016021(integral to membrane)|GO:0042246(tissue regeneration)	2.02015
NPTN	neuroplastin	GO:0005886(plasma membrane)|GO:0007156(homophilic cell adhesion)|GO:0016021(integral to membrane)|GO:0042734(presynaptic membrane)|GO:0048170(positive regulation of long-term neuronal synaptic plasticity)|GO:0050839(cell adhesion molecule binding)	2.03678
NPTX1	neuronal pentraxin I	GO:0005509(calcium ion binding)|GO:0006810(transport)|GO:0007268(synaptic transmission)|GO:0007417(central nervous system development)|GO:0030141(secretory granule)|GO:0031410(cytoplasmic vesicle)	0.441977
NQO2	NAD(P)H dehydrogenase, quinone 2	GO:0001512(dihydronicotinamide riboside quinone reductase activity)|GO:0005737(cytoplasm)|GO:0008270(zinc ion binding)|GO:0008753(NADPH dehydrogenase (quinone) activity)|GO:0009055(electron carrier activity)|GO:0046872(metal ion binding)|GO:0050662(coenzyme binding)|GO:0055114(oxidation reduction)	2.12308
NR1I2	nuclear receptor subfamily 1, group I, member 2	GO:0003700(transcription factor activity)|GO:0003707(steroid hormone receptor activity)|GO:0003713(transcription coactivator activity)|GO:0005515(protein binding)|GO:0005634(nucleus)|GO:0006355(regulation of transcription, DNA-dependent)|GO:0006805(xenobiotic metabolic process)|GO:0007165(signal transduction)|GO:0008202(steroid metabolic process)|GO:0008270(zinc ion binding)|GO:0016481(negative r…	0.499274
NRG1	neuregulin 1	GO:0003712(transcription cofactor activity)|GO:0005576(extracellular region)|GO:0005634(nucleus)|GO:0005886(plasma membrane)|GO:0007154(cell communication)|GO:0007219(Notch signaling pathway)|GO:0007399(nervous system development)|GO:0008083(growth factor activity)|GO:0009790(embryonic development)|GO:0014032(neural crest cell development)|GO:0016021(integral to membrane)|GO:0016481(negative regu…	2.00532
NRN1	neuritin 1	GO:0005886(plasma membrane)|GO:0031225(anchored to membrane)	2.39639
NRP1	neuropilin 1	GO:0001569(patterning of blood vessels)|GO:0004872(receptor activity)|GO:0005021(vascular endothelial growth factor receptor activity)|GO:0005576(extracellular region)|GO:0005886(plasma membrane)|GO:0007155(cell adhesion)|GO:0007165(signal transduction)|GO:0007267(cell-cell signaling)|GO:0007275(multicellular organismal development)|GO:0007399(nervous system development)|GO:0007411(axon guidance)…	2.02227
ODF3L2	outer dense fiber of sperm tails 3-like 2		2.08006
OR10C1	olfactory receptor, family 10, subfamily C, member 1	GO:0004872(receptor activity)|GO:0004984(olfactory receptor activity)|GO:0005886(plasma membrane)|GO:0007165(signal transduction)|GO:0007186(G-protein coupled receptor protein signaling pathway)|GO:0007608(sensory perception of smell)|GO:0016021(integral to membrane)|GO:0050896(response to stimulus)	2.50155
OR10J1	olfactory receptor, family 10, subfamily J, member 1	GO:0004872(receptor activity)|GO:0004984(olfactory receptor activity)|GO:0005886(plasma membrane)|GO:0005887(integral to plasma membrane)|GO:0007165(signal transduction)|GO:0007186(G-protein coupled receptor protein signaling pathway)|GO:0007338(single fertilization)|GO:0007608(sensory perception of smell)|GO:0050896(response to stimulus)	2.13055
OR5AK2	olfactory receptor, family 5, subfamily AK, member 2	GO:0004872(receptor activity)|GO:0004984(olfactory receptor activity)|GO:0005886(plasma membrane)|GO:0007165(signal transduction)|GO:0007186(G-protein coupled receptor protein signaling pathway)|GO:0007608(sensory perception of smell)|GO:0016021(integral to membrane)|GO:0050896(response to stimulus)	2.07123
P2RX1	purinergic receptor P2X, ligand-gated ion channel, 1	GO:0001614(purinergic nucleotide receptor activity)|GO:0002554(serotonin secretion by platelet)|GO:0003056(regulation of vascular smooth muscle contraction)|GO:0004872(receptor activity)|GO:0004931(ATP-gated cation channel activity)|GO:0005515(protein binding)|GO:0005524(ATP binding)|GO:0005886(plasma membrane)|GO:0005887(integral to plasma membrane)|GO:0006919(activation of caspase activity)|GO:…	2.06135
PADI4	peptidyl arginine deiminase, type IV	GO:0004668(protein-arginine deiminase activity)|GO:0005509(calcium ion binding)|GO:0005634(nucleus)|GO:0005737(cytoplasm)|GO:0006464(protein modification process)|GO:0016568(chromatin modification)|GO:0016787(hydrolase activity)|GO:0018101(peptidyl-citrulline biosynthetic process from peptidyl-arginine)|GO:0045449(regulation of transcription)	2.37547
PBX4	pre-B-cell leukemia homeobox 4	GO:0001741(XY body)|GO:0003700(transcription factor activity)|GO:0005634(nucleus)|GO:0006355(regulation of transcription, DNA-dependent)|GO:0006366(transcription from RNA polymerase II promoter)|GO:0016563(transcription activator activity)|GO:0043565(sequence-specific DNA binding)	0.463416
PCNXL2	pecanex-like 2 (Drosophila)	GO:0016020(membrane)|GO:0016021(integral to membrane)	0.492748
PCNXL3	pecanex-like 3 (Drosophila)	GO:0016020(membrane)|GO:0016021(integral to membrane)	2.16239
PDLIM2	PDZ and LIM domain 2 (mystique)	GO:0005515(protein binding)|GO:0005634(nucleus)|GO:0005737(cytoplasm)|GO:0005856(cytoskeleton)|GO:0008270(zinc ion binding)|GO:0009986(cell surface)|GO:0046872(metal ion binding)	2.32576
PFKFB2	6-phosphofructo-2-kinase/fructose-2,6-biphosphatase 2	GO:0000166(nucleotide binding)|GO:0003873(6-phosphofructo-2-kinase activity)|GO:0004331(fructose-2,6-bisphosphate 2-phosphatase activity)|GO:0005524(ATP binding)|GO:0005737(cytoplasm)|GO:0005829(cytosol)|GO:0006003(fructose 2,6-bisphosphate metabolic process)|GO:0006007(glucose catabolic process)|GO:0006089(lactate metabolic process)|GO:0006090(pyruvate metabolic process)|GO:0008152(metabolic pro…	2.04476
PFKFB4	6-phosphofructo-2-kinase/fructose-2,6-biphosphatase 4	GO:0000166(nucleotide binding)|GO:0003873(6-phosphofructo-2-kinase activity)|GO:0004331(fructose-2,6-bisphosphate 2-phosphatase activity)|GO:0005524(ATP binding)|GO:0005575(cellular_component)|GO:0005829(cytosol)|GO:0006003(fructose 2,6-bisphosphate metabolic process)|GO:0008152(metabolic process)|GO:0016301(kinase activity)|GO:0016740(transferase activity)|GO:0016787(hydrolase activity)|GO:00428…	2.08405
PHC2	polyhomeotic homolog 2 (Drosophila)	GO:0003677(DNA binding)|GO:0005634(nucleus)|GO:0007275(multicellular organismal development)|GO:0008270(zinc ion binding)|GO:0042802(identical protein binding)|GO:0046872(metal ion binding)	2.11349
PHF21A	PHD finger protein 21A	GO:0000118(histone deacetylase complex)|GO:0000122(negative regulation of transcription from RNA polymerase II promoter)|GO:0003677(DNA binding)|GO:0005515(protein binding)|GO:0005634(nucleus)|GO:0008270(zinc ion binding)|GO:0016568(chromatin modification)|GO:0045449(regulation of transcription)|GO:0046872(metal ion binding)	2.09033
PICALM	phosphatidylinositol binding clathrin assembly protein	GO:0005543(phospholipid binding)|GO:0005545(phosphatidylinositol binding)|GO:0005794(Golgi apparatus)|GO:0005905(coated pit)|GO:0006461(protein complex assembly)|GO:0006898(receptor-mediated endocytosis)|GO:0016020(membrane)|GO:0030118(clathrin coat)|GO:0030136(clathrin-coated vesicle)|GO:0030276(clathrin binding)|GO:0031410(cytoplasmic vesicle)|GO:0048268(clathrin coat assembly)	2.23161
PIK3AP1	phosphoinositide-3-kinase adaptor protein 1	GO:0005066(transmembrane receptor protein tyrosine kinase signaling protein activity)|GO:0005515(protein binding)|GO:0005737(cytoplasm)|GO:0005886(plasma membrane)	2.17578
PILRA	paired immunoglobin-like type 2 receptor alpha	GO:0004872(receptor activity)|GO:0005515(protein binding)|GO:0005576(extracellular region)|GO:0005886(plasma membrane)|GO:0007165(signal transduction)|GO:0016021(integral to membrane)|GO:0044419(interspecies interaction between organisms)	2.08311
PITPNA	phosphatidylinositol transfer protein, alpha	GO:0005515(protein binding)|GO:0005543(phospholipid binding)|GO:0005622(intracellular)|GO:0005634(nucleus)|GO:0005737(cytoplasm)|GO:0006629(lipid metabolic process)|GO:0006810(transport)|GO:0007601(visual perception)|GO:0008525(phosphatidylcholine transmembrane transporter activity)|GO:0008526(phosphatidylinositol transporter activity)|GO:0015914(phospholipid transport)	2.25048
PKD1L2	polycystic kidney disease 1-like 2	GO:0005216(ion channel activity)|GO:0005488(binding)|GO:0005509(calcium ion binding)|GO:0005529(sugar binding)|GO:0006811(ion transport)|GO:0007218(neuropeptide signaling pathway)|GO:0016020(membrane)|GO:0016021(integral to membrane)	2.01333
PLA2G4A	phospholipase A2, group IVA (cytosolic, calcium-dependent)	GO:0001542(ovulation from ovarian follicle)|GO:0001554(luteolysis)|GO:0004622(lysophospholipase activity)|GO:0005509(calcium ion binding)|GO:0005624(membrane fraction)|GO:0005634(nucleus)|GO:0005737(cytoplasm)|GO:0005829(cytosol)|GO:0006663(platelet activating factor biosynthetic process)|GO:0007568(aging)|GO:0008152(metabolic process)|GO:0008284(positive regulation of cell proliferation)|GO:0009…	2.13654
PLA2G4C	phospholipase A2, group IVC (cytosolic, calcium-independent)	GO:0005543(phospholipid binding)|GO:0005829(cytosol)|GO:0006954(inflammatory response)|GO:0007242(intracellular signaling cascade)|GO:0007567(parturition)|GO:0008152(metabolic process)|GO:0016020(membrane)|GO:0016042(lipid catabolic process)|GO:0016787(hydrolase activity)|GO:0019369(arachidonic acid metabolic process)|GO:0031225(anchored to membrane)|GO:0046475(glycerophospholipid catabolic proce…	2.10983
PLAC4	placenta-specific 4		2.09397
PLBD1	phospholipase B domain containing 1	GO:0005576(extracellular region)|GO:0016042(lipid catabolic process)|GO:0016787(hydrolase activity)	2.20745
PLIN3	perilipin 3	GO:0005515(protein binding)|GO:0005737(cytoplasm)|GO:0005768(endosome)|GO:0005794(Golgi apparatus)|GO:0012511(monolayer-surrounded lipid storage body)|GO:0016020(membrane)|GO:0016192(vesicle-mediated transport)	2.00981
PLXDC1	plexin domain containing 1	GO:0001525(angiogenesis)|GO:0003674(molecular_function)|GO:0005576(extracellular region)|GO:0005737(cytoplasm)|GO:0016020(membrane)|GO:0016021(integral to membrane)	0.437881
PLXDC2	plexin domain containing 2	GO:0016020(membrane)|GO:0016021(integral to membrane)	2.05723
PLXNA4	plexin A4	GO:0004872(receptor activity)|GO:0005622(intracellular)|GO:0005886(plasma membrane)|GO:0007165(signal transduction)|GO:0007275(multicellular organismal development)|GO:0007399(nervous system development)|GO:0016021(integral to membrane)|GO:0017154(semaphorin receptor activity)	2.17766
PPP4R1	protein phosphatase 4, regulatory subunit 1	GO:0005515(protein binding)|GO:0005625(soluble fraction)|GO:0007165(signal transduction)|GO:0030362(protein phosphatase type 4 regulator activity)	2.12669
PPT1	palmitoyl-protein thioesterase 1	GO:0002084(protein depalmitoylation)|GO:0005576(extracellular region)|GO:0005624(membrane fraction)|GO:0005634(nucleus)|GO:0005764(lysosome)|GO:0005794(Golgi apparatus)|GO:0005829(cytosol)|GO:0006309(DNA fragmentation involved in apoptosis)|GO:0007042(lysosomal lumen acidification)|GO:0007399(nervous system development)|GO:0007420(brain development)|GO:0007601(visual perception)|GO:0008021(synapt…	2.38163
PRKAR1A	protein kinase, cAMP-dependent, regulatory, type I, alpha (tissue specific extinguisher 1)	GO:0000166(nucleotide binding)|GO:0001707(mesoderm formation)|GO:0001932(regulation of protein amino acid phosphorylation)|GO:0005515(protein binding)|GO:0005829(cytosol)|GO:0005952(cAMP-dependent protein kinase complex)|GO:0006357(regulation of transcription from RNA polymerase II promoter)|GO:0008603(cAMP-dependent protein kinase regulator activity)|GO:0009755(hormone-mediated signaling pathway…	2.01054
PTAFR	platelet-activating factor receptor	GO:0001816(cytokine production)|GO:0001875(lipopolysaccharide receptor activity)|GO:0004872(receptor activity)|GO:0004992(platelet activating factor receptor activity)|GO:0005543(phospholipid binding)|GO:0005886(plasma membrane)|GO:0005887(integral to plasma membrane)|GO:0006935(chemotaxis)|GO:0006954(inflammatory response)|GO:0006955(immune response)|GO:0007165(signal transduction)|GO:0007186(G-…	2.02379
PTH2	parathyroid hormone 2	GO:0005576(extracellular region)|GO:0007218(neuropeptide signaling pathway)	2.05851
PTPRJ	protein tyrosine phosphatase, receptor type, J	GO:0001570(vasculogenesis)|GO:0005001(transmembrane receptor protein tyrosine phosphatase activity)|GO:0005515(protein binding)|GO:0005634(nucleus)|GO:0005886(plasma membrane)|GO:0005887(integral to plasma membrane)|GO:0006470(protein amino acid dephosphorylation)|GO:0007169(transmembrane receptor protein tyrosine kinase signaling pathway)|GO:0007267(cell-cell signaling)|GO:0007507(heart developm…	2.44408
PYY2	peptide YY, 2 (seminalplasmin)	GO:0005179(hormone activity)|GO:0005576(extracellular region)	2.00163
RAB13	RAB13, member RAS oncogene family	GO:0000166(nucleotide binding)|GO:0003924(GTPase activity)|GO:0005525(GTP binding)|GO:0005737(cytoplasm)|GO:0005794(Golgi apparatus)|GO:0005886(plasma membrane)|GO:0005911(cell-cell junction)|GO:0005923(tight junction)|GO:0007155(cell adhesion)|GO:0007264(small GTPase mediated signal transduction)|GO:0015031(protein transport)|GO:0016192(vesicle-mediated transport)|GO:0031410(cytoplasmic vesicle)	2.19091
RAB27A	RAB27A, member RAS oncogene family	GO:0000166(nucleotide binding)|GO:0001750(photoreceptor outer segment)|GO:0003924(GTPase activity)|GO:0005515(protein binding)|GO:0005525(GTP binding)|GO:0005764(lysosome)|GO:0005770(late endosome)|GO:0005794(Golgi apparatus)|GO:0006605(protein targeting)|GO:0006887(exocytosis)|GO:0007264(small GTPase mediated signal transduction)|GO:0007596(blood coagulation)|GO:0015031(protein transport)|GO:001…	2.05912
RALGAPA1	Ral GTPase activating protein, alpha subunit 1 (catalytic)	GO:0005096(GTPase activator activity)|GO:0005622(intracellular)|GO:0005634(nucleus)|GO:0005737(cytoplasm)|GO:0005739(mitochondrion)|GO:0051056(regulation of small GTPase mediated signal transduction)	0.367112
RBM20	RNA binding motif protein 20	GO:0003723(RNA binding)|GO:0005622(intracellular)|GO:0008270(zinc ion binding)	0.343029
RBMS3	RNA binding motif, single stranded interacting protein	GO:0000166(nucleotide binding)|GO:0003723(RNA binding)|GO:0005737(cytoplasm)	0.465313
RELT	RELT tumor necrosis factor receptor	GO:0004872(receptor activity)|GO:0005737(cytoplasm)|GO:0005886(plasma membrane)|GO:0016021(integral to membrane)	2.03846
RNF13	ring finger protein 13	GO:0005515(protein binding)|GO:0005634(nucleus)|GO:0005737(cytoplasm)|GO:0008270(zinc ion binding)|GO:0046872(metal ion binding)	2.04935
RNF19B	ring finger protein 19B	GO:0005515(protein binding)|GO:0006955(immune response)|GO:0008270(zinc ion binding)|GO:0016020(membrane)|GO:0016021(integral to membrane)|GO:0016874(ligase activity)|GO:0019941(modification-dependent protein catabolic process)|GO:0046872(metal ion binding)	2.17012
RRP15	ribosomal RNA processing 15 homolog (S. cerevisiae)	GO:0005515(protein binding)	0.486564
RSHL1	radial spokehead-like 1	GO:0005622(intracellular)	2.00439
RYR3	ryanodine receptor 3	GO:0004872(receptor activity)|GO:0005216(ion channel activity)|GO:0005219(ryanodine-sensitive calcium-release channel activity)|GO:0005509(calcium ion binding)|GO:0006811(ion transport)|GO:0006816(calcium ion transport)|GO:0006874(cellular calcium ion homeostasis)|GO:0015278(calcium-release channel activity)|GO:0016020(membrane)|GO:0016021(integral to membrane)|GO:0055085(transmembrane transport)	0.484689
SBF2	SET binding factor 2	GO:0005515(protein binding)|GO:0005737(cytoplasm)|GO:0005774(vacuolar membrane)|GO:0016020(membrane)|GO:0016311(dephosphorylation)|GO:0016791(phosphatase activity)|GO:0019208(phosphatase regulator activity)|GO:0019898(extrinsic to membrane)|GO:0019902(phosphatase binding)|GO:0035091(phosphoinositide binding)|GO:0042552(myelination)|GO:0042803(protein homodimerization activity)|GO:0051262(protein …	2.07109
SBNO2	strawberry notch homolog 2 (Drosophila)	GO:0002281(macrophage activation during immune response)|GO:0005575(cellular_component)|GO:0016564(transcription repressor activity)|GO:0045449(regulation of transcription)|GO:0045892(negative regulation of transcription, DNA-dependent)|GO:0050727(regulation of inflammatory response)	2.1999
SCARF2	scavenger receptor class F, member 2	GO:0004872(receptor activity)|GO:0005515(protein binding)|GO:0007155(cell adhesion)|GO:0016020(membrane)|GO:0016021(integral to membrane)	2.01726
SEMA3A	sema domain, immunoglobulin domain (Ig), short basic domain, secreted, (semaphorin) 3A	GO:0002027(regulation of heart rate)|GO:0004872(receptor activity)|GO:0005576(extracellular region)|GO:0006915(apoptosis)|GO:0007275(multicellular organismal development)|GO:0007399(nervous system development)|GO:0007411(axon guidance)|GO:0007413(axonal fasciculation)|GO:0016020(membrane)|GO:0030154(cell differentiation)|GO:0030424(axon)|GO:0030425(dendrite)|GO:0045499(chemorepellent activity)|GO…	0.349075
SEMA4B	sema domain, immunoglobulin domain (Ig), transmembrane domain (TM) and short cytoplasmic domain, (semaphorin) 4B	GO:0004872(receptor activity)|GO:0007275(multicellular organismal development)|GO:0007399(nervous system development)|GO:0016020(membrane)|GO:0016021(integral to membrane)|GO:0030154(cell differentiation)	2.02517
SEMA5A	sema domain, seven thrombospondin repeats (type 1 and type 1-like), transmembrane domain (TM) and short cytoplasmic domain, (semaphorin) 5A	GO:0001569(patterning of blood vessels)|GO:0004872(receptor activity)|GO:0005886(plasma membrane)|GO:0007155(cell adhesion)|GO:0007267(cell-cell signaling)|GO:0007275(multicellular organismal development)|GO:0007399(nervous system development)|GO:0007411(axon guidance)|GO:0008046(axon guidance receptor activity)|GO:0016021(integral to membrane)|GO:0030154(cell differentiation)	0.347317
SERPINE1	serpin peptidase inhibitor, clade E (nexin, plasminogen activator inhibitor type 1), member 1	GO:0000302(response to reactive oxygen species)|GO:0001300(chronological cell aging)|GO:0002020(protease binding)|GO:0004252(serine-type endopeptidase activity)|GO:0004867(serine-type endopeptidase inhibitor activity)|GO:0005515(protein binding)|GO:0005576(extracellular region)|GO:0005625(soluble fraction)|GO:0005886(plasma membrane)|GO:0007596(blood coagulation)|GO:0030414(peptidase inhibitor ac…	2.00183
SHKBP1	SH3KBP1 binding protein 1	GO:0005249(voltage-gated potassium channel activity)|GO:0005515(protein binding)|GO:0006813(potassium ion transport)|GO:0008076(voltage-gated potassium channel complex)|GO:0016020(membrane)	2.21725
SLC14A1	solute carrier family 14 (urea transporter), member 1 (Kidd blood group)	GO:0005372(water transporter activity)|GO:0005886(plasma membrane)|GO:0005887(integral to plasma membrane)|GO:0006810(transport)|GO:0006833(water transport)|GO:0015204(urea transmembrane transporter activity)|GO:0015840(urea transport)|GO:0034450(ubiquitin-ubiquitin ligase activity)	2.186
SLC16A3	solute carrier family 16, member 3 (monocarboxylic acid transporter 4)	GO:0005624(membrane fraction)|GO:0005886(plasma membrane)|GO:0005887(integral to plasma membrane)|GO:0006090(pyruvate metabolic process)|GO:0015293(symporter activity)|GO:0015355(secondary active monocarboxylate transmembrane transporter activity)|GO:0015711(organic anion transport)|GO:0015718(monocarboxylic acid transport)|GO:0055085(transmembrane transport)	2.06375
SLC25A23	solute carrier family 25 (mitochondrial carrier; phosphate carrier), member 23	GO:0005215(transporter activity)|GO:0005488(binding)|GO:0005509(calcium ion binding)|GO:0005739(mitochondrion)|GO:0005743(mitochondrial inner membrane)|GO:0016020(membrane)|GO:0016021(integral to membrane)|GO:0055085(transmembrane transport)	0.462991
SLC5A9	solute carrier family 5 (sodium/glucose cotransporter), member 9	GO:0005215(transporter activity)|GO:0005362(low-affinity glucose:sodium symporter activity)|GO:0005886(plasma membrane)|GO:0006811(ion transport)|GO:0006814(sodium ion transport)|GO:0016021(integral to membrane)|GO:0031402(sodium ion binding)|GO:0055085(transmembrane transport)	2.13042
SLC6A12	solute carrier family 6 (neurotransmitter transporter, betaine/GABA), member 12	GO:0005328(neurotransmitter:sodium symporter activity)|GO:0005332(gamma-aminobutyric acid:sodium symporter activity)|GO:0005887(integral to plasma membrane)|GO:0006836(neurotransmitter transport)|GO:0006865(amino acid transport)|GO:0015293(symporter activity)|GO:0016020(membrane)	2.03842
SLC6A9	solute carrier family 6 (neurotransmitter transporter, glycine), member 9	GO:0005328(neurotransmitter:sodium symporter activity)|GO:0005624(membrane fraction)|GO:0005887(integral to plasma membrane)|GO:0006836(neurotransmitter transport)|GO:0006865(amino acid transport)|GO:0015293(symporter activity)|GO:0015375(glycine:sodium symporter activity)|GO:0015816(glycine transport)|GO:0016020(membrane)	2.15624
SLFN13	schlafen family member 13	GO:0000166(nucleotide binding)|GO:0005524(ATP binding)|GO:0005622(intracellular)	0.489332
SMPDL3A	sphingomyelin phosphodiesterase, acid-like 3A	GO:0004767(sphingomyelin phosphodiesterase activity)|GO:0005515(protein binding)|GO:0005576(extracellular region)|GO:0005615(extracellular space)|GO:0006685(sphingomyelin catabolic process)|GO:0008152(metabolic process)|GO:0016798(hydrolase activity, acting on glycosyl bonds)	2.4071
SNX10	sorting nexin 10	GO:0005515(protein binding)|GO:0007154(cell communication)|GO:0015031(protein transport)|GO:0035091(phosphoinositide binding)	2.07703
SOD2	superoxide dismutase 2, mitochondrial	GO:0000303(response to superoxide)|GO:0001306(age-dependent response to oxidative stress)|GO:0001315(age-dependent response to reactive oxygen species)|GO:0001666(response to hypoxia)|GO:0001836(release of cytochrome c from mitochondria)|GO:0001889(liver development)|GO:0003032(detection of oxygen)|GO:0003069(vasodilation by acetylcholine involved in regulation of systemic arterial blood pressure…	2.18433
SORT1	sortilin 1	GO:0001503(ossification)|GO:0004872(receptor activity)|GO:0005634(nucleus)|GO:0005764(lysosome)|GO:0005769(early endosome)|GO:0005783(endoplasmic reticulum)|GO:0005792(microsome)|GO:0005794(Golgi apparatus)|GO:0005886(plasma membrane)|GO:0005905(coated pit)|GO:0006810(transport)|GO:0006895(Golgi to endosome transport)|GO:0006897(endocytosis)|GO:0007218(neuropeptide signaling pathway)|GO:0007275(m…	2.29721
SP1	Sp1 transcription factor	GO:0001503(ossification)|GO:0001829(trophectodermal cell differentiation)|GO:0001889(liver development)|GO:0001892(embryonic placenta development)|GO:0003690(double-stranded DNA binding)|GO:0003700(transcription factor activity)|GO:0003702(RNA polymerase II transcription factor activity)|GO:0005622(intracellular)|GO:0005634(nucleus)|GO:0005730(nucleolus)|GO:0005737(cytoplasm)|GO:0008022(protein C…	2.01515
SP8	Sp8 transcription factor	GO:0003677(DNA binding)|GO:0005622(intracellular)|GO:0005634(nucleus)|GO:0008270(zinc ion binding)|GO:0009953(dorsal/ventral pattern formation)|GO:0009954(proximal/distal pattern formation)|GO:0030326(embryonic limb morphogenesis)|GO:0046872(metal ion binding)	2.09071
SPDYA	speedy homolog A (Xenopus laevis)	GO:0000082(G1/S transition of mitotic cell cycle)|GO:0005634(nucleus)|GO:0006974(response to DNA damage stimulus)|GO:0007049(cell cycle)|GO:0007275(multicellular organismal development)|GO:0008284(positive regulation of cell proliferation)|GO:0019901(protein kinase binding)|GO:0045737(positive regulation of cyclin-dependent protein kinase activity)	2.0877
ST6GALNAC2	ST6 (alpha-N-acetyl-neuraminyl-2,3-beta-galactosyl-1,3)-N-acetylgalactosaminide alpha-2,6-sialyltransferase 2	GO:0005794(Golgi apparatus)|GO:0006486(protein amino acid glycosylation)|GO:0008373(sialyltransferase activity)|GO:0016020(membrane)|GO:0016021(integral to membrane)|GO:0030173(integral to Golgi membrane)	2.23589
STARD9	StAR-related lipid transfer (START) domain containing 9	GO:0000166(nucleotide binding)|GO:0003777(microtubule motor activity)|GO:0005524(ATP binding)|GO:0007018(microtubule-based movement)	0.406999
STBD1	starch binding domain 1	GO:0003824(catalytic activity)|GO:0005624(membrane fraction)|GO:0005887(integral to plasma membrane)|GO:0005975(carbohydrate metabolic process)|GO:0006936(muscle contraction)|GO:0016020(membrane)|GO:0030246(carbohydrate binding)	2.273
STC1	stanniocalcin 1	GO:0001503(ossification)|GO:0005179(hormone activity)|GO:0005576(extracellular region)|GO:0005615(extracellular space)|GO:0006874(cellular calcium ion homeostasis)|GO:0007166(cell surface receptor linked signal transduction)|GO:0007267(cell-cell signaling)|GO:0007584(response to nutrient)	2.167
STK3	serine/threonine kinase 3 (STE20 homolog, yeast)	GO:0000166(nucleotide binding)|GO:0000287(magnesium ion binding)|GO:0004674(protein serine/threonine kinase activity)|GO:0005524(ATP binding)|GO:0005634(nucleus)|GO:0005737(cytoplasm)|GO:0006468(protein amino acid phosphorylation)|GO:0007165(signal transduction)|GO:0007243(protein kinase cascade)|GO:0016740(transferase activity)|GO:0043065(positive regulation of apoptosis)|GO:0046983(protein dime…	2.22927
STK33	serine/threonine kinase 33	GO:0000166(nucleotide binding)|GO:0004674(protein serine/threonine kinase activity)|GO:0005524(ATP binding)|GO:0005634(nucleus)|GO:0005737(cytoplasm)|GO:0005794(Golgi apparatus)|GO:0006468(protein amino acid phosphorylation)|GO:0016740(transferase activity)|GO:0048471(perinuclear region of cytoplasm)	0.43097
STK38L	serine/threonine kinase 38 like	GO:0000166(nucleotide binding)|GO:0000287(magnesium ion binding)|GO:0003779(actin binding)|GO:0004674(protein serine/threonine kinase activity)|GO:0005515(protein binding)|GO:0005524(ATP binding)|GO:0005737(cytoplasm)|GO:0006468(protein amino acid phosphorylation)|GO:0007243(protein kinase cascade)|GO:0015629(actin cytoskeleton)|GO:0016740(transferase activity)|GO:0051128(regulation of cellular c…	2.01823
STXBP4	syntaxin binding protein 4	GO:0005515(protein binding)|GO:0005737(cytoplasm)|GO:0006605(protein targeting)|GO:0008286(insulin receptor signaling pathway)|GO:0015758(glucose transport)	0.494796
SWAP70	SWAP switching B-cell complex 70kDa subunit	GO:0003677(DNA binding)|GO:0005515(protein binding)|GO:0005524(ATP binding)|GO:0005634(nucleus)|GO:0005737(cytoplasm)|GO:0005886(plasma membrane)|GO:0016444(somatic cell DNA recombination)|GO:0030027(lamellipodium)|GO:0045190(isotype switching)	0.494592
SYN1	synapsin I	GO:0000795(synaptonemal complex)|GO:0003779(actin binding)|GO:0003824(catalytic activity)|GO:0005215(transporter activity)|GO:0005515(protein binding)|GO:0005524(ATP binding)|GO:0005794(Golgi apparatus)|GO:0007268(synaptic transmission)|GO:0007269(neurotransmitter secretion)|GO:0030054(cell junction)|GO:0030672(synaptic vesicle membrane)|GO:0045202(synapse)|GO:0048786(presynaptic active zone)	2.15722
SYNPO2	synaptopodin 2	GO:0003779(actin binding)|GO:0005515(protein binding)|GO:0005634(nucleus)|GO:0005737(cytoplasm)	0.413268
TAOK2	TAO kinase 2	GO:0000166(nucleotide binding)|GO:0000186(activation of MAPKK activity)|GO:0000287(magnesium ion binding)|GO:0001558(regulation of cell growth)|GO:0004674(protein serine/threonine kinase activity)|GO:0005524(ATP binding)|GO:0006612(protein targeting to membrane)|GO:0006915(apoptosis)|GO:0006950(response to stress)|GO:0008360(regulation of cell shape)|GO:0016020(membrane)|GO:0016021(integral to me…	2.06969
TDH	L-threonine dehydrogenase	GO:0003824(catalytic activity)|GO:0005488(binding)|GO:0005739(mitochondrion)|GO:0044237(cellular metabolic process)|GO:0050662(coenzyme binding)	2.28551
TEKT2	tektin 2 (testicular)	GO:0000226(microtubule cytoskeleton organization)|GO:0001539(ciliary or flagellar motility)|GO:0005874(microtubule)|GO:0005929(cilium)|GO:0019861(flagellum)|GO:0030030(cell projection organization)|GO:0030317(sperm motility)	2.15156
TEX28	testis expressed 28	GO:0003674(molecular_function)|GO:0008150(biological_process)|GO:0016020(membrane)|GO:0016021(integral to membrane)	2.00998
TLR2	toll-like receptor 2	GO:0001875(lipopolysaccharide receptor activity)|GO:0002238(response to molecule of fungal origin)|GO:0002282(microglial cell activation during immune response)|GO:0002752(cell surface pattern recognition receptor signaling pathway)|GO:0002755(MyD88-dependent toll-like receptor signaling pathway)|GO:0004888(transmembrane receptor activity)|GO:0005886(plasma membrane)|GO:0005887(integral to plasma…	2.21118
TLR8	toll-like receptor 8	GO:0003677(DNA binding)|GO:0003725(double-stranded RNA binding)|GO:0003727(single-stranded RNA binding)|GO:0004888(transmembrane receptor activity)|GO:0005121(Toll binding)|GO:0005515(protein binding)|GO:0006954(inflammatory response)|GO:0007165(signal transduction)|GO:0007249(I-kappaB kinase/NF-kappaB cascade)|GO:0009597(detection of virus)|GO:0010008(endosome membrane)|GO:0016020(membrane)|GO:0…	2.56737
TMC5	transmembrane channel-like 5	GO:0016020(membrane)|GO:0016021(integral to membrane)	2.39682
TMEM229B	transmembrane protein 229B	GO:0016020(membrane)|GO:0016021(integral to membrane)	2.17694
TMEM88	transmembrane protein 88	GO:0016020(membrane)|GO:0016021(integral to membrane)	2.19035
TNFRSF11A	tumor necrosis factor receptor superfamily, member 11a, NFKB activator	GO:0001503(ossification)|GO:0004872(receptor activity)|GO:0005515(protein binding)|GO:0007165(signal transduction)|GO:0007267(cell-cell signaling)|GO:0007275(multicellular organismal development)|GO:0008284(positive regulation of cell proliferation)|GO:0016020(membrane)|GO:0016021(integral to membrane)|GO:0048535(lymph node development)	0.41946
TNFRSF1A	tumor necrosis factor receptor superfamily, member 1A	GO:0004872(receptor activity)|GO:0005031(tumor necrosis factor receptor activity)|GO:0005576(extracellular region)|GO:0005886(plasma membrane)|GO:0005887(integral to plasma membrane)|GO:0006693(prostaglandin metabolic process)|GO:0006915(apoptosis)|GO:0009816(defense response to bacterium, incompatible interaction)|GO:0019221(cytokine-mediated signaling pathway)|GO:0032403(protein complex binding…	2.01539
TNFRSF25	tumor necrosis factor receptor superfamily, member 25	GO:0004872(receptor activity)|GO:0005031(tumor necrosis factor receptor activity)|GO:0005515(protein binding)|GO:0005576(extracellular region)|GO:0005829(cytosol)|GO:0005886(plasma membrane)|GO:0005887(integral to plasma membrane)|GO:0007166(cell surface receptor linked signal transduction)|GO:0008624(induction of apoptosis by extracellular signals)|GO:0042981(regulation of apoptosis)	0.485054
TNFSF10	tumor necrosis factor (ligand) superfamily, member 10	GO:0005125(cytokine activity)|GO:0005164(tumor necrosis factor receptor binding)|GO:0005576(extracellular region)|GO:0005615(extracellular space)|GO:0005625(soluble fraction)|GO:0005887(integral to plasma membrane)|GO:0006917(induction of apoptosis)|GO:0006955(immune response)|GO:0007165(signal transduction)|GO:0007267(cell-cell signaling)|GO:0008270(zinc ion binding)|GO:0008633(activation of pro…	2.11931
TREML2	triggering receptor expressed on myeloid cells-like 2	GO:0004872(receptor activity)|GO:0005515(protein binding)|GO:0005886(plasma membrane)|GO:0009986(cell surface)|GO:0016021(integral to membrane)|GO:0042110(T cell activation)	2.39259
TRIB1	tribbles homolog 1 (Drosophila)	GO:0004672(protein kinase activity)|GO:0004860(protein kinase inhibitor activity)|GO:0005524(ATP binding)|GO:0005634(nucleus)|GO:0005737(cytoplasm)|GO:0006468(protein amino acid phosphorylation)|GO:0006469(negative regulation of protein kinase activity)|GO:0007254(JNK cascade)|GO:0008134(transcription factor binding)|GO:0014912(negative regulation of smooth muscle cell migration)|GO:0031434(mitog…	2.76892
TRIM2	tripartite motif-containing 2	GO:0005515(protein binding)|GO:0005622(intracellular)|GO:0005737(cytoplasm)|GO:0008150(biological_process)|GO:0008270(zinc ion binding)|GO:0046872(metal ion binding)	0.493802
TRIM21	tripartite motif-containing 21	GO:0003677(DNA binding)|GO:0003723(RNA binding)|GO:0005515(protein binding)|GO:0005622(intracellular)|GO:0005634(nucleus)|GO:0005737(cytoplasm)|GO:0008270(zinc ion binding)|GO:0030529(ribonucleoprotein complex)|GO:0046872(metal ion binding)|GO:0070206(protein trimerization)	2.03161
TRIM64	tripartite motif-containing 64	GO:0005515(protein binding)|GO:0005622(intracellular)|GO:0008270(zinc ion binding)|GO:0046872(metal ion binding)	0.284766
TSHZ3	teashirt zinc finger homeobox 3	GO:0003700(transcription factor activity)|GO:0005622(intracellular)|GO:0005634(nucleus)|GO:0006355(regulation of transcription, DNA-dependent)|GO:0007275(multicellular organismal development)|GO:0008270(zinc ion binding)|GO:0043565(sequence-specific DNA binding)|GO:0046872(metal ion binding)	2.21895
TSPAN6	tetraspanin 6	GO:0004871(signal transducer activity)|GO:0016020(membrane)|GO:0016021(integral to membrane)|GO:0043123(positive regulation of I-kappaB kinase/NF-kappaB cascade)	0.464605
TTC9B	tetratricopeptide repeat domain 9B	GO:0005488(binding)|GO:0006457(protein folding)	2.3277
TTN	titin	GO:0000166(nucleotide binding)|GO:0000287(magnesium ion binding)|GO:0000794(condensed nuclear chromosome)|GO:0004674(protein serine/threonine kinase activity)|GO:0004713(protein tyrosine kinase activity)|GO:0005089(Rho guanyl-nucleotide exchange factor activity)|GO:0005509(calcium ion binding)|GO:0005516(calmodulin binding)|GO:0005524(ATP binding)|GO:0005576(extracellular region)|GO:0005622(intra…	0.494947
TTTY10	testis-specific transcript, Y-linked 10 (non-protein coding)		2.04891
UBE2C	ubiquitin-conjugating enzyme E2C	GO:0000166(nucleotide binding)|GO:0004842(ubiquitin-protein ligase activity)|GO:0005524(ATP binding)|GO:0005654(nucleoplasm)|GO:0005829(cytosol)|GO:0006511(ubiquitin-dependent protein catabolic process)|GO:0007049(cell cycle)|GO:0007051(spindle organization)|GO:0007067(mitosis)|GO:0008054(cyclin catabolic process)|GO:0016567(protein ubiquitination)|GO:0016874(ligase activity)|GO:0031145(anaphase-…	2.22621
UNC84A	unc-84 homolog A (C. elegans)	GO:0005634(nucleus)|GO:0005737(cytoplasm)|GO:0016020(membrane)|GO:0016021(integral to membrane)|GO:0031965(nuclear membrane)|GO:0048471(perinuclear region of cytoplasm)	0.460815
USP15	ubiquitin specific peptidase 15	GO:0004197(cysteine-type endopeptidase activity)|GO:0004221(ubiquitin thiolesterase activity)|GO:0004843(ubiquitin-specific protease activity)|GO:0005515(protein binding)|GO:0006511(ubiquitin-dependent protein catabolic process)|GO:0008233(peptidase activity)	2.0099
USP32	ubiquitin specific peptidase 32	GO:0004221(ubiquitin thiolesterase activity)|GO:0005509(calcium ion binding)|GO:0006511(ubiquitin-dependent protein catabolic process)|GO:0008233(peptidase activity)|GO:0008234(cysteine-type peptidase activity)|GO:0016020(membrane)|GO:0031225(anchored to membrane)	2.19739
USP36	ubiquitin specific peptidase 36	GO:0004221(ubiquitin thiolesterase activity)|GO:0005634(nucleus)|GO:0005730(nucleolus)|GO:0006511(ubiquitin-dependent protein catabolic process)|GO:0008233(peptidase activity)|GO:0008234(cysteine-type peptidase activity)	0.412557
USP6	ubiquitin specific peptidase 6 (Tre-2 oncogene)	GO:0003676(nucleic acid binding)|GO:0004197(cysteine-type endopeptidase activity)|GO:0004221(ubiquitin thiolesterase activity)|GO:0005097(Rab GTPase activator activity)|GO:0005515(protein binding)|GO:0005622(intracellular)|GO:0005764(lysosome)|GO:0006464(protein modification process)|GO:0006511(ubiquitin-dependent protein catabolic process)|GO:0008233(peptidase activity)|GO:0032313(regulation of …	2.03387
VGLL2	vestigial like 2 (Drosophila)	GO:0003713(transcription coactivator activity)|GO:0005515(protein binding)|GO:0005634(nucleus)|GO:0005737(cytoplasm)|GO:0007519(skeletal muscle tissue development)|GO:0030528(transcription regulator activity)|GO:0045449(regulation of transcription)|GO:0045944(positive regulation of transcription from RNA polymerase II promoter)	2.04696
WDR55	WD repeat domain 55	GO:0003674(molecular_function)|GO:0005575(cellular_component)|GO:0005634(nucleus)|GO:0005730(nucleolus)|GO:0005737(cytoplasm)|GO:0006364(rRNA processing)|GO:0008150(biological_process)	2.10009
WFDC2	WAP four-disulfide core domain 2	GO:0004867(serine-type endopeptidase inhibitor activity)|GO:0005576(extracellular region)|GO:0005615(extracellular space)|GO:0006508(proteolysis)|GO:0007283(spermatogenesis)	2.3869
WNT11	wingless-type MMTV integration site family, member 11	GO:0004871(signal transducer activity)|GO:0005576(extracellular region)|GO:0005578(proteinaceous extracellular matrix)|GO:0007165(signal transduction)|GO:0007223(Wnt receptor signaling pathway, calcium modulating pathway)|GO:0007275(multicellular organismal development)|GO:0009653(anatomical structure morphogenesis)	2.01883
WNT2	wingless-type MMTV integration site family member 2	GO:0004871(signal transducer activity)|GO:0005201(extracellular matrix structural constituent)|GO:0005576(extracellular region)|GO:0005578(proteinaceous extracellular matrix)|GO:0005737(cytoplasm)|GO:0007223(Wnt receptor signaling pathway, calcium modulating pathway)|GO:0007275(multicellular organismal development)	2.29905
XKRX	XK, Kell blood group complex subunit-related, X-linked	GO:0005886(plasma membrane)|GO:0016021(integral to membrane)	0.423313
XPO6	exportin 6	GO:0005515(protein binding)|GO:0005634(nucleus)|GO:0005737(cytoplasm)|GO:0006611(protein export from nucleus)|GO:0006886(intracellular protein transport)|GO:0008565(protein transporter activity)	2.06132
XPR1	xenotropic and polytropic retrovirus receptor	GO:0004930(G-protein coupled receptor activity)|GO:0005886(plasma membrane)|GO:0005887(integral to plasma membrane)|GO:0007186(G-protein coupled receptor protein signaling pathway)|GO:0009615(response to virus)	2.21907
ZAK	sterile alpha motif and leucine zipper containing kinase AZK	GO:0000075(cell cycle checkpoint)|GO:0000077(DNA damage checkpoint)|GO:0000166(nucleotide binding)|GO:0000186(activation of MAPKK activity)|GO:0000287(magnesium ion binding)|GO:0004674(protein serine/threonine kinase activity)|GO:0004709(MAP kinase kinase kinase activity)|GO:0004713(protein tyrosine kinase activity)|GO:0005524(ATP binding)|GO:0005634(nucleus)|GO:0005737(cytoplasm)|GO:0006950(resp…	2.18699
ZBTB10	zinc finger and BTB domain containing 10	GO:0003677(DNA binding)|GO:0005515(protein binding)|GO:0005622(intracellular)|GO:0005634(nucleus)|GO:0005730(nucleolus)|GO:0008270(zinc ion binding)|GO:0045449(regulation of transcription)|GO:0046872(metal ion binding)	0.483494
ZDHHC18	zinc finger, DHHC-type containing 18	GO:0008270(zinc ion binding)|GO:0008415(acyltransferase activity)|GO:0016020(membrane)|GO:0016021(integral to membrane)|GO:0016740(transferase activity)|GO:0046872(metal ion binding)	2.06887
ZFP42	zinc finger protein 42 homolog (mouse)	GO:0003700(transcription factor activity)|GO:0005622(intracellular)|GO:0005634(nucleus)|GO:0005737(cytoplasm)|GO:0007126(meiosis)|GO:0008270(zinc ion binding)|GO:0008584(male gonad development)|GO:0008585(female gonad development)|GO:0045449(regulation of transcription)|GO:0046872(metal ion binding)	0.405597
ZNF257	zinc finger protein 257	GO:0003677(DNA binding)|GO:0005622(intracellular)|GO:0005634(nucleus)|GO:0006355(regulation of transcription, DNA-dependent)|GO:0008270(zinc ion binding)|GO:0046872(metal ion binding)	0.480681
ZNF286A	zinc finger protein 286A	GO:0003677(DNA binding)|GO:0005622(intracellular)|GO:0005634(nucleus)|GO:0006355(regulation of transcription, DNA-dependent)|GO:0008270(zinc ion binding)|GO:0046872(metal ion binding)	0.429485
ZNF347	zinc finger protein 347	GO:0003677(DNA binding)|GO:0005622(intracellular)|GO:0005634(nucleus)|GO:0006355(regulation of transcription, DNA-dependent)|GO:0008270(zinc ion binding)|GO:0046872(metal ion binding)	0.487728
ZNF516	zinc finger protein 516	GO:0003677(DNA binding)|GO:0005622(intracellular)|GO:0005634(nucleus)|GO:0005737(cytoplasm)|GO:0008270(zinc ion binding)|GO:0045449(regulation of transcription)|GO:0046872(metal ion binding)	2.21017
ZNF568	zinc finger protein 568	GO:0003677(DNA binding)|GO:0005622(intracellular)|GO:0005634(nucleus)|GO:0006355(regulation of transcription, DNA-dependent)|GO:0008270(zinc ion binding)|GO:0046872(metal ion binding)	0.467347
ZNF831	zinc finger protein 831	GO:0003676(nucleic acid binding)|GO:0005622(intracellular)|GO:0008270(zinc ion binding)|GO:0046872(metal ion binding)	0.49061
ZYX	zyxin	GO:0001725(stress fiber)|GO:0005515(protein binding)|GO:0005634(nucleus)|GO:0005737(cytoplasm)|GO:0005856(cytoskeleton)|GO:0005886(plasma membrane)|GO:0005887(integral to plasma membrane)|GO:0005913(cell-cell adherens junction)|GO:0005925(focal adhesion)|GO:0007155(cell adhesion)|GO:0007165(signal transduction)|GO:0007267(cell-cell signaling)|GO:0008270(zinc ion binding)|GO:0030054(cell junction)…	2.10984
Expression altered only at week 12
ABCA10	ATP-binding cassette, sub-family A (ABC1), member 10	GO:0000166(nucleotide binding)|GO:0005524(ATP binding)|GO:0006810(transport)|GO:0016020(membrane)|GO:0016021(integral to membrane)|GO:0016887(ATPase activity)		0.449869
ABCC6	ATP-binding cassette, sub-family C (CFTR/MRP), member 6	GO:0000166(nucleotide binding)|GO:0005215(transporter activity)|GO:0005524(ATP binding)|GO:0005624(membrane fraction)|GO:0005886(plasma membrane)|GO:0006200(ATP catabolic process)|GO:0007601(visual perception)|GO:0016021(integral to membrane)|GO:0016324(apical plasma membrane)|GO:0016328(lateral plasma membrane)|GO:0016887(ATPase activity)|GO:0042493(response to drug)|GO:0042626(ATPase activity, …		2.09071
ABHD10	abhydrolase domain containing 10	GO:0005739(mitochondrion)|GO:0008233(peptidase activity)|GO:0008236(serine-type peptidase activity)		0.338938
ACBD4	acyl-Coenzyme A binding domain containing 4	GO:0000062(acyl-CoA binding)|GO:0005488(binding)		2.22116
ACHE	acetylcholinesterase (Yt blood group)	GO:0001507(acetylcholine catabolic process in synaptic cleft)|GO:0001540(beta-amyloid binding)|GO:0002076(osteoblast development)|GO:0003990(acetylcholinesterase activity)|GO:0004104(cholinesterase activity)|GO:0005518(collagen binding)|GO:0005576(extracellular region)|GO:0005605(basal lamina)|GO:0005634(nucleus)|GO:0005794(Golgi apparatus)|GO:0005886(plasma membrane)|GO:0006260(DNA replication)|…		2.37035
ACOT11	acyl-CoA thioesterase 11	GO:0004091(carboxylesterase activity)|GO:0005737(cytoplasm)|GO:0006631(fatty acid metabolic process)|GO:0007242(intracellular signaling cascade)|GO:0009409(response to cold)|GO:0016291(acyl-CoA thioesterase activity)|GO:0016787(hydrolase activity)		2.51654
ACVR1B	activin A receptor, type IB	GO:0000082(G1/S transition of mitotic cell cycle)|GO:0000166(nucleotide binding)|GO:0000287(magnesium ion binding)|GO:0001701(in utero embryonic development)|GO:0001942(hair follicle development)|GO:0004674(protein serine/threonine kinase activity)|GO:0004872(receptor activity)|GO:0005524(ATP binding)|GO:0006917(induction of apoptosis)|GO:0007165(signal transduction)|GO:0007178(transmembrane rece…		2.16334
ADAM33	ADAM metallopeptidase domain 33	GO:0004222(metalloendopeptidase activity)|GO:0006508(proteolysis)|GO:0008233(peptidase activity)|GO:0008270(zinc ion binding)|GO:0016020(membrane)|GO:0016021(integral to membrane)|GO:0046872(metal ion binding)		2.06536
ADAMTS13	ADAM metallopeptidase with thrombospondin type 1 motif, 13	GO:0004222(metalloendopeptidase activity)|GO:0005178(integrin binding)|GO:0005509(calcium ion binding)|GO:0005515(protein binding)|GO:0005576(extracellular region)|GO:0005578(proteinaceous extracellular matrix)|GO:0005615(extracellular space)|GO:0006508(proteolysis)|GO:0007160(cell-matrix adhesion)|GO:0007229(integrin-mediated signaling pathway)|GO:0008233(peptidase activity)|GO:0008270(zinc ion …		2.05237
ADAMTSL2	ADAMTS-like 2	GO:0004222(metalloendopeptidase activity)|GO:0005576(extracellular region)|GO:0005578(proteinaceous extracellular matrix)|GO:0008233(peptidase activity)|GO:0008270(zinc ion binding)		2.07656
AGAP7	ArfGAP with GTPase domain, ankyrin repeat and PH domain 7	GO:0008060(ARF GTPase activator activity)|GO:0008270(zinc ion binding)|GO:0032312(regulation of ARF GTPase activity)|GO:0046872(metal ion binding)		0.490787
AGBL3	ATP/GTP binding protein-like 3	GO:0004181(metallocarboxypeptidase activity)|GO:0005737(cytoplasm)|GO:0006508(proteolysis)|GO:0008233(peptidase activity)|GO:0008237(metallopeptidase activity)|GO:0008270(zinc ion binding)|GO:0046872(metal ion binding)		0.46953
ALOXE3	arachidonate lipoxygenase 3	GO:0005506(iron ion binding)|GO:0016165(lipoxygenase activity)|GO:0016491(oxidoreductase activity)|GO:0019370(leukotriene biosynthetic process)|GO:0046872(metal ion binding)|GO:0055114(oxidation reduction)		2.00301
AMOT	angiomotin	GO:0001570(vasculogenesis)|GO:0001701(in utero embryonic development)|GO:0001702(gastrulation with mouth forming second)|GO:0005884(actin filament)|GO:0005923(tight junction)|GO:0006935(chemotaxis)|GO:0030027(lamellipodium)|GO:0030036(actin cytoskeleton organization)|GO:0030054(cell junction)|GO:0031410(cytoplasmic vesicle)|GO:0040019(positive regulation of embryonic development)|GO:0042074(cell …		0.475178
ANKS3	ankyrin repeat and sterile alpha motif domain containing 3			2.091
ANO8	anoctamin 8	GO:0005216(ion channel activity)|GO:0005254(chloride channel activity)|GO:0005509(calcium ion binding)|GO:0006811(ion transport)|GO:0016020(membrane)|GO:0016021(integral to membrane)|GO:0031404(chloride ion binding)|GO:0034707(chloride channel complex)		0.496818
ANXA10	annexin A10	GO:0005509(calcium ion binding)|GO:0005544(calcium-dependent phospholipid binding)|GO:0005739(mitochondrion)		2.22185
APC2	adenomatosis polyposis coli 2	GO:0005737(cytoplasm)|GO:0005794(Golgi apparatus)|GO:0005856(cytoskeleton)|GO:0005874(microtubule)|GO:0005886(plasma membrane)|GO:0006461(protein complex assembly)|GO:0007165(signal transduction)|GO:0008013(beta-catenin binding)|GO:0008017(microtubule binding)|GO:0016055(Wnt receptor signaling pathway)|GO:0016342(catenin complex)		2.56658
AQP5	aquaporin 5	GO:0005215(transporter activity)|GO:0005515(protein binding)|GO:0005783(endoplasmic reticulum)|GO:0005887(integral to plasma membrane)|GO:0005902(microvillus)|GO:0006833(water transport)|GO:0007588(excretion)|GO:0009925(basal plasma membrane)|GO:0015250(water channel activity)|GO:0015670(carbon dioxide transport)|GO:0016020(membrane)|GO:0016324(apical plasma membrane)|GO:0055085(transmembrane tra…		2.01253
AQP7	aquaporin 7	GO:0005215(transporter activity)|GO:0005737(cytoplasm)|GO:0005887(integral to plasma membrane)|GO:0006091(generation of precursor metabolites and energy)|GO:0006833(water transport)|GO:0007283(spermatogenesis)|GO:0007588(excretion)|GO:0015250(water channel activity)|GO:0015254(glycerol channel activity)|GO:0015265(urea channel activity)|GO:0015793(glycerol transport)|GO:0015840(urea transport)|GO…		2.30053
ARHGEF10	Rho guanine nucleotide exchange factor (GEF) 10	GO:0005085(guanyl-nucleotide exchange factor activity)|GO:0005089(Rho guanyl-nucleotide exchange factor activity)|GO:0005622(intracellular)|GO:0035023(regulation of Rho protein signal transduction)		0.397947
ARID1B	AT rich interactive domain 1B (SWI1-like)	GO:0003677(DNA binding)|GO:0003713(transcription coactivator activity)|GO:0005515(protein binding)|GO:0005622(intracellular)|GO:0005634(nucleus)|GO:0005730(nucleolus)|GO:0005737(cytoplasm)|GO:0016514(SWI/SNF complex)|GO:0016568(chromatin modification)|GO:0045449(regulation of transcription)|GO:0048096(chromatin-mediated maintenance of transcription)		2.21474
ATM	ataxia telangiectasia mutated	GO:0000077(DNA damage checkpoint)|GO:0000166(nucleotide binding)|GO:0001756(somitogenesis)|GO:0003677(DNA binding)|GO:0004674(protein serine/threonine kinase activity)|GO:0005524(ATP binding)|GO:0005634(nucleus)|GO:0005654(nucleoplasm)|GO:0005819(spindle)|GO:0006281(DNA repair)|GO:0006468(protein amino acid phosphorylation)|GO:0006974(response to DNA damage stimulus)|GO:0007049(cell cycle)|GO:000…		0.47683
ATOH7	atonal homolog 7 (Drosophila)	GO:0003677(DNA binding)|GO:0005634(nucleus)|GO:0007275(multicellular organismal development)|GO:0007399(nervous system development)|GO:0007623(circadian rhythm)|GO:0009649(entrainment of circadian clock)|GO:0030154(cell differentiation)|GO:0030528(transcription regulator activity)|GO:0045449(regulation of transcription)		2.03838
BCKDHB	branched chain keto acid dehydrogenase E1, beta polypeptide	GO:0003826(alpha-ketoacid dehydrogenase activity)|GO:0003863(3-methyl-2-oxobutanoate dehydrogenase (2-methylpropanoyl-transferring) activity)|GO:0005739(mitochondrion)|GO:0005759(mitochondrial matrix)|GO:0005947(mitochondrial alpha-ketoglutarate dehydrogenase complex)|GO:0007584(response to nutrient)|GO:0009083(branched chain family amino acid catabolic process)|GO:0016831(carboxy-lyase activity)…		0.415384
BDKRB2	bradykinin receptor B2	GO:0002020(protease binding)|GO:0004435(phosphoinositide phospholipase C activity)|GO:0004872(receptor activity)|GO:0004930(G-protein coupled receptor activity)|GO:0004947(bradykinin receptor activity)|GO:0005515(protein binding)|GO:0005768(endosome)|GO:0005886(plasma membrane)|GO:0005887(integral to plasma membrane)|GO:0006939(smooth muscle contraction)|GO:0006954(inflammatory response)|GO:00071…		2.15731
BEND5	BEN domain containing 5	GO:0005794(Golgi apparatus)		0.468126
BNIP3L	BCL2/adenovirus E1B 19kDa interacting protein 3-like	GO:0005521(lamin binding)|GO:0005634(nucleus)|GO:0005635(nuclear envelope)|GO:0005739(mitochondrion)|GO:0005740(mitochondrial envelope)|GO:0005783(endoplasmic reticulum)|GO:0006917(induction of apoptosis)|GO:0008634(negative regulation of survival gene product expression)|GO:0016020(membrane)|GO:0016021(integral to membrane)|GO:0042803(protein homodimerization activity)|GO:0043066(negative regula…		2.05161
BOD1L	biorientation of chromosomes in cell division 1-like	GO:0003677(DNA binding)		2.2755
BPNT1	3'(2'), 5'-bisphosphate nucleotidase 1	GO:0000287(magnesium ion binding)|GO:0004437(inositol or phosphatidylinositol phosphatase activity)|GO:0005829(cytosol)|GO:0006139(nucleobase, nucleoside, nucleotide and nucleic acid metabolic process)|GO:0007399(nervous system development)|GO:0008441(3'(2'),5'-bisphosphate nucleotidase activity)|GO:0016787(hydrolase activity)|GO:0031403(lithium ion binding)		0.434546
C10orf10	chromosome 10 open reading frame 10	GO:0005739(mitochondrion)		0.351981
C10orf114	chromosome 10 open reading frame 114			2.07478
C11orf42	chromosome 11 open reading frame 42			2.02349
C11orf76	chromosome 11 open reading frame 76			2.15027
C12orf42	chromosome 12 open reading frame 42			0.392132
C13orf38	chromosome 13 open reading frame 38			2.12382
C14orf45	chromosome 14 open reading frame 45			2.03544
C16orf86	chromosome 16 open reading frame 86			2.04621
C17orf42	chromosome 17 open reading frame 42	GO:0003676(nucleic acid binding)		2.09004
C17orf51	chromosome 17 open reading frame 51			0.43401
C17orf72	chromosome 17 open reading frame 72			2.21753
C18orf55	chromosome 18 open reading frame 55	GO:0005739(mitochondrion)|GO:0015031(protein transport)|GO:0016020(membrane)|GO:0016021(integral to membrane)|GO:0055085(transmembrane transport)		0.406003
C19orf23	chromosome 19 open reading frame 23			2.06814
C19orf73	chromosome 19 open reading frame 73			2.14625
C1orf107	chromosome 1 open reading frame 107	GO:0005634(nucleus)|GO:0007275(multicellular organismal development)		0.497161
C1orf64	chromosome 1 open reading frame 64			2.10125
C1orf96	chromosome 1 open reading frame 96			2.01857
C1QA	complement component 1, q subcomponent, A chain	GO:0005576(extracellular region)|GO:0005602(complement component C1 complex)|GO:0005737(cytoplasm)|GO:0005794(Golgi apparatus)|GO:0006958(complement activation, classical pathway)|GO:0007267(cell-cell signaling)|GO:0045087(innate immune response)		2.10317
C1S	complement component 1, s subcomponent	GO:0004252(serine-type endopeptidase activity)|GO:0005509(calcium ion binding)|GO:0005576(extracellular region)|GO:0006508(proteolysis)|GO:0006958(complement activation, classical pathway)|GO:0008233(peptidase activity)|GO:0010001(glial cell differentiation)|GO:0045087(innate immune response)|GO:0051591(response to cAMP)		2.58888
C20orf112	chromosome 20 open reading frame 112			2.23043
C20orf186	chromosome 20 open reading frame 186	GO:0005576(extracellular region)|GO:0005737(cytoplasm)|GO:0008289(lipid binding)		2.04716
C20orf54	chromosome 20 open reading frame 54	GO:0005515(protein binding)|GO:0016020(membrane)|GO:0016021(integral to membrane)|GO:0034605(cellular response to heat)		2.14732
C21orf7	chromosome 21 open reading frame 7	GO:0005515(protein binding)|GO:0005634(nucleus)|GO:0005829(cytosol)		0.352502
C21orf93	chromosome 21 open reading frame 93			2.13091
C2CD4C	C2 calcium-dependent domain containing 4C			2.22487
[truncated: 341 more rows]
