# Supplementary material for: Pregnancy Induces Transcriptional Activation of the Peripheral Innate Immune System and Increases Oxidative DNA Damage among Healthy Third Trimester Pregnant Women
Source: PLoS One. 2012 Nov 2;7(11):e46736. doi: 10.1371/journal.pone.0046736 (PMC3487782; doi:10.1371/journal.pone.0046736)
Supplement: Table S2 — Gene ontology altered in third trimester pregnant women and non-pregnant women at week 12 (study end) of the controlled feeding study. Data were analyzed with Gominer. (XLSX) [file pone.0046736.s002.xlsx]

## Sheet: Table S2
Gene Ontology	Total Genes	Altered Genes	P value
GO:0006952 defense response	769	112	< 0.001
GO:0002376 immune system process	1258	137	< 0.001
GO:0006955 immune response	773	95	< 0.001
GO:0006954 inflammatory response	353	53	< 0.001
GO:0050896 response to stimulus	3961	316	< 0.001
GO:0009617 response to bacterium	220	38	< 0.001
GO:0042742 defense response to bacterium	99	23	< 0.001
GO:0032501 multicellular organismal process	4621	349	< 0.001
GO:0042221 response to chemical stimulus	1939	169	< 0.001
GO:0009607 response to biotic stimulus	474	57	< 0.001
GO:0051707 response to other organism	386	49	< 0.001
GO:0045087 innate immune response	267	37	< 0.001
GO:0002252 immune effector process	266	36	< 0.001
GO:0006950 response to stress	2184	179	< 0.001
GO:0009611 response to wounding	823	81	< 0.001
GO:0006909 phagocytosis	68	15	< 0.001
GO:0009595 detection of biotic stimulus	20	8	< 0.001
GO:0002443 leukocyte mediated immunity	141	23	< 0.001
GO:0065008 regulation of biological quality	2056	168	< 0.001
GO:0051704 multi-organism process	813	79	< 0.001
GO:0009620 response to fungus	27	9	< 0.001
GO:0002237 response to molecule of bacterial origin	135	22	< 0.001
GO:0046903 secretion	639	65	< 0.001
GO:0007586 digestion	101	18	< 0.001
GO:0032490 detection of molecule of bacterial origin	8	5	< 0.001
GO:0002460 adaptive immune response based on somatic recombination of immune receptors built from immunoglobulin superfamily domains	122	20	< 0.001
GO:0002274 myeloid leukocyte activation	76	15	< 0.001
GO:0002250 adaptive immune response	124	20	< 0.001
GO:0008063 Toll signaling pathway	5	4	< 0.001
GO:0009605 response to external stimulus	976	88	< 0.001
GO:0051048 negative regulation of secretion	72	14	< 0.001
GO:0048821 erythrocyte development	14	6	< 0.001
GO:0006956 complement activation	40	10	< 0.001
GO:0007166 cell surface receptor linked signaling pathway	1734	141	< 0.001
GO:0006959 humoral immune response	84	15	< 0.001
GO:0007204 elevation of cytosolic calcium ion concentration	133	20	< 0.001
GO:0055065 metal ion homeostasis	254	31	< 0.001
GO:0072376 protein activation cascade	58	12	< 0.001
GO:0001774 microglial cell activation	10	5	< 0.001
GO:0044060 regulation of endocrine process	10	5	< 0.001
GO:0006875 cellular metal ion homeostasis	244	30	< 0.001
GO:0006958 complement activation classical pathway	28	8	< 0.001
GO:0042116 macrophage activation	28	8	< 0.001
GO:0001817 regulation of cytokine production	213	27	< 0.001
GO:0007565 female pregnancy	117	18	< 0.001
GO:0050832 defense response to fungus	16	6	< 0.001
GO:0051239 regulation of multicellular organismal process	1131	97	< 0.001
GO:0048878 chemical homeostasis	576	56	< 0.001
GO:0001816 cytokine production	240	29	< 0.001
GO:0030218 erythrocyte differentiation	62	12	< 0.001
GO:0031640 killing of cells of another organism	23	7	< 0.001
GO:0050764 regulation of phagocytosis	23	7	< 0.001
GO:0002684 positive regulation of immune system process	400	42	< 0.001
GO:0003013 circulatory system process	254	30	< 0.001
GO:0008015 blood circulation	254	30	< 0.001
GO:0051480 cytosolic calcium ion homeostasis	142	20	< 0.001
GO:0002455 humoral immune response mediated by circulating immunoglobulin	38	9	< 0.001
GO:0016064 immunoglobulin mediated immune response	73	13	< 0.001
GO:0002449 lymphocyte mediated immunity	113	17	< 0.001
GO:0023052 signaling	3748	269	< 0.001
GO:0019724 B cell mediated immunity	74	13	< 0.001
GO:0050778 positive regulation of immune response	260	30	< 0.001
GO:0007589 body fluid secretion	66	12	0.00052608
GO:0055082 cellular chemical homeostasis	422	43	0.000537014
GO:0030225 macrophage differentiation	19	6	0.000658494
GO:0050766 positive regulation of phagocytosis	19	6	0.000658494
GO:0060986 endocrine hormone secretion	13	5	0.000682873
GO:0034101 erythrocyte homeostasis	68	12	0.000696471
GO:0010033 response to organic substance	997	85	0.000700179
GO:0043249 erythrocyte maturation	8	4	0.000763041
GO:0072507 divalent inorganic cation homeostasis	220	26	0.000805508
GO:0030099 myeloid cell differentiation	163	21	0.000826221
GO:0046717 acid secretion	20	6	0.000893007
GO:0051180 vitamin transport	20	6	0.000893007
GO:0055074 calcium ion homeostasis	210	25	0.000905676
GO:0032640 tumor necrosis factor production	35	8	0.000941523
GO:0032680 regulation of tumor necrosis factor production	35	8	0.000941523
GO:0006836 neurotransmitter transport	122	17	0.00105067
GO:0006873 cellular ion homeostasis	411	41	0.00108648
GO:0072503 cellular divalent inorganic cation homeostasis	213	25	0.0011112
GO:0050886 endocrine process	36	8	0.00114734
GO:0032496 response to lipopolysaccharide	123	17	0.00115227
GO:0032309 icosanoid secretion	21	6	0.0011869
GO:0071715 icosanoid transport	21	6	0.0011869
GO:0006874 cellular calcium ion homeostasis	203	24	0.00125153
GO:0040011 locomotion	947	80	0.00130821
GO:0030003 cellular cation homeostasis	276	30	0.00131881
GO:0002263 cell activation involved in immune response	83	13	0.00135397
GO:0002366 leukocyte activation involved in immune response	83	13	0.00135397
GO:0002275 myeloid cell activation involved in immune response	29	7	0.00138988
GO:0032675 regulation of interleukin-6 production	46	9	0.00150389
GO:0051241 negative regulation of multicellular organismal process	194	23	0.0015082
GO:0032677 regulation of interleukin-8 production	22	6	0.00154944
GO:0045944 positive regulation of transcription from RNA polymerase II promoter	419	41	0.00156898
GO:0008283 cell proliferation	1197	97	0.00157432
GO:0010817 regulation of hormone levels	317	33	0.00161108
GO:0002444 myeloid leukocyte mediated immunity	30	7	0.00171966
GO:0031960 response to corticosteroid stimulus	106	15	0.00173251
GO:0048731 system development	2689	196	0.00175886
GO:0051240 positive regulation of multicellular organismal process	295	31	0.00189789
GO:0007186 G-protein coupled receptor protein signaling pathway	530	49	0.00193838
GO:0032502 developmental process	3522	249	0.00197237
GO:0071706 tumor necrosis factor superfamily cytokine production	39	8	0.0019867
GO:0001893 maternal placenta development	16	5	0.00199076
GO:0045408 regulation of interleukin-6 biosynthetic process	16	5	0.00199076
GO:0060456 positive regulation of digestive system process	5	3	0.00200826
GO:0032635 interleukin-6 production	48	9	0.00205474
GO:0045414 regulation of interleukin-8 biosynthetic process	10	4	0.00207597
GO:0032940 secretion by cell	534	49	0.00226067
GO:0002682 regulation of immune system process	602	54	0.00226997
GO:0042127 regulation of cell proliferation	881	74	0.00229434
GO:0048872 homeostasis of number of cells	120	16	0.00231886
GO:0003001 generation of a signal involved in cell-cell signaling	262	28	0.00240981
GO:0023061 signal release	262	28	0.00240981
GO:0051384 response to glucocorticoid stimulus	99	14	0.00244958
GO:0071705 nitrogen compound transport	166	20	0.00246032
GO:0032637 interleukin-8 production	24	6	0.00252
GO:0046888 negative regulation of hormone secretion	32	7	0.00255869
GO:0071219 cellular response to molecule of bacterial origin	32	7	0.00255869
GO:0007275 multicellular organismal development	3219	228	0.00303201
GO:0000165 MAPKKK cascade	343	34	0.00309279
GO:0030154 cell differentiation	2000	149	0.00309352
GO:0002467 germinal center formation	11	4	0.00310716
GO:0042228 interleukin-8 biosynthetic process	11	4	0.00310716
GO:0050829 defense response to Gram-negative bacterium	11	4	0.00310716
GO:0051302 regulation of cell division	51	9	0.00317039
GO:0001906 cell killing	61	10	0.00335242
GO:0042089 cytokine biosynthetic process	92	13	0.00346919
GO:0035176 social behavior	18	5	0.00353006
GO:0042226 interleukin-6 biosynthetic process	18	5	0.00353006
GO:0050776 regulation of immune response	372	36	0.00353793
GO:0042592 homeostatic process	882	73	0.0035532
GO:0007155 cell adhesion	811	68	0.00356427
GO:0022610 biological adhesion	811	68	0.00356427
GO:0042035 regulation of cytokine biosynthetic process	82	12	0.00365609
GO:0055080 cation homeostasis	308	31	0.00367349
GO:0042107 cytokine metabolic process	93	13	0.00381584
GO:0006910 phagocytosis recognition	6	3	0.00383615
GO:0010886 positive regulation of cholesterol storage	6	3	0.00383615
GO:0014050 negative regulation of glutamate secretion	6	3	0.00383615
GO:0019322 pentose biosynthetic process	6	3	0.00383615
GO:0051818 disruption of cells of other organism involved in symbiotic interaction	6	3	0.00383615
GO:0051883 killing of cells in other organism involved in symbiotic interaction	6	3	0.00383615
GO:0052033 pathogen-associated molecular pattern dependent induction by symbiont of host innate immunity	6	3	0.00383615
GO:0052166 positive regulation by symbiont of host innate immunity	6	3	0.00383615
GO:0052167 modulation by symbiont of host innate immunity	6	3	0.00383615
GO:0052169 pathogen-associated molecular pattern dependent modulation by symbiont of host innate immunity	6	3	0.00383615
GO:0052257 pathogen-associated molecular pattern dependent induction by organism of innate immunity of other organism involved in symbiotic interaction	6	3	0.00383615
GO:0052305 positive regulation by organism of innate immunity in other organism involved in symbiotic interaction	6	3	0.00383615
GO:0052306 modulation by organism of innate immunity in other organism involved in symbiotic interaction	6	3	0.00383615
GO:0052308 pathogen-associated molecular pattern dependent modulation by organism of innate immunity in other organism involved in symbiotic interaction	6	3	0.00383615
GO:0052552 modulation by organism of immune response of other organism involved in symbiotic interaction	6	3	0.00383615
GO:0052553 modulation by symbiont of host immune response	6	3	0.00383615
GO:0052555 positive regulation by organism of immune response of other organism involved in symbiotic interaction	6	3	0.00383615
GO:0052556 positive regulation by symbiont of host immune response	6	3	0.00383615
GO:0070391 response to lipoteichoic acid	6	3	0.00383615
GO:0071223 cellular response to lipoteichoic acid	6	3	0.00383615
GO:0046942 carboxylic acid transport	173	20	0.00397537
GO:0008285 negative regulation of cell proliferation	388	37	0.00400086
GO:0002526 acute inflammatory response	73	11	0.00420843
GO:0003014 renal system process	35	7	0.00436612
GO:0046504 glycerol ether biosynthetic process	44	8	0.00438371
GO:0010885 regulation of cholesterol storage	12	4	0.00443967
GO:0016045 detection of bacterium	12	4	0.00443967
GO:0046697 decidualization	12	4	0.00443967
GO:0015849 organic acid transport	175	20	0.00452877
GO:0002253 activation of immune response	212	23	0.00469129
GO:0009409 response to cold	27	6	0.00474692
GO:0050801 ion homeostasis	446	41	0.00482737
GO:0048584 positive regulation of response to stimulus	393	37	0.0049285
GO:0048518 positive regulation of biological process	2424	175	0.00493542
GO:0048869 cellular developmental process	2041	150	0.00501498
GO:0050727 regulation of inflammatory response	96	13	0.00502705
GO:0046879 hormone secretion	165	19	0.00513685
GO:0048856 anatomical structure development	2958	209	0.00538409
GO:0009266 response to temperature stimulus	97	13	0.00549317
GO:0003008 system process	1398	107	0.00565349
GO:0051817 modification of morphology or physiology of other organism involved in symbiotic interaction	28	6	0.00573838
GO:0021872 forebrain generation of neurons	20	5	0.00577649
GO:0042088 T-helper 1 type immune response	20	5	0.00577649
GO:0022600 digestive system process	46	8	0.00580315
GO:0001819 positive regulation of cytokine production	109	14	0.00592912
GO:0019432 triglyceride biosynthetic process	37	7	0.00601937
GO:0010878 cholesterol storage	13	4	0.00610936
GO:0010884 positive regulation of lipid storage	13	4	0.00610936
GO:0042533 tumor necrosis factor biosynthetic process	13	4	0.00610936
GO:0042534 regulation of tumor necrosis factor biosynthetic process	13	4	0.00610936
GO:0050482 arachidonic acid secretion	13	4	0.00610936
GO:0002282 microglial cell activation involved in immune response	7	3	0.00641275
GO:0006030 chitin metabolic process	7	3	0.00641275
GO:0006032 chitin catabolic process	7	3	0.00641275
GO:0015884 folic acid transport	7	3	0.00641275
GO:0032229 negative regulation of synaptic transmission GABAergic	7	3	0.00641275
GO:0042756 drinking behavior	7	3	0.00641275
GO:0045064 T-helper 2 cell differentiation	7	3	0.00641275
GO:0045410 positive regulation of interleukin-6 biosynthetic process	7	3	0.00641275
GO:0045416 positive regulation of interleukin-8 biosynthetic process	7	3	0.00641275
GO:0052564 response to immune response of other organism involved in symbiotic interaction	7	3	0.00641275
GO:0052572 response to host immune response	7	3	0.00641275
GO:0060670 branching involved in embryonic placenta morphogenesis	7	3	0.00641275
GO:0009628 response to abiotic stimulus	413	38	0.00641854
GO:0044243 multicellular organismal catabolic process	29	6	0.00687276
GO:0042036 negative regulation of cytokine biosynthetic process	21	5	0.00721074
GO:0042730 fibrinolysis	21	5	0.00721074
GO:0046626 regulation of insulin receptor signaling pathway	21	5	0.00721074
GO:0051702 interaction with symbiont	21	5	0.00721074
GO:0030097 hemopoiesis	336	32	0.00725239
GO:0045321 leukocyte activation	403	37	0.00733711
GO:0009914 hormone transport	171	19	0.00751081
GO:0015908 fatty acid transport	48	8	0.00754755
GO:0007588 excretion	58	9	0.00761858
GO:0008217 regulation of blood pressure	101	13	0.00771401
GO:0046460 neutral lipid biosynthetic process	39	7	0.00809959
GO:0046463 acylglycerol biosynthetic process	39	7	0.00809959
GO:0002446 neutrophil mediated immunity	14	4	0.00814924
GO:0010039 response to iron ion	14	4	0.00814924
GO:0032760 positive regulation of tumor necrosis factor production	14	4	0.00814924
GO:0044110 growth involved in symbiotic interaction	14	4	0.00814924
GO:0044116 growth of symbiont involved in interaction with host	14	4	0.00814924
GO:0044117 growth of symbiont in host	14	4	0.00814924
GO:0044126 regulation of growth of symbiont in host	14	4	0.00814924
GO:0044130 negative regulation of growth of symbiont in host	14	4	0.00814924
GO:0044144 modulation of growth of symbiont involved in interaction with host	14	4	0.00814924
GO:0044146 negative regulation of growth of symbiont involved in interaction with host	14	4	0.00814924
GO:0048512 circadian behavior	14	4	0.00814924
GO:0050830 defense response to Gram-positive bacterium	30	6	0.00816103
GO:0031099 regeneration	91	12	0.0084945
GO:0015850 organic alcohol transport	49	8	0.00855492
GO:0010557 positive regulation of macromolecule biosynthetic process	771	63	0.00859791
GO:0030574 collagen catabolic process	22	5	0.00887583
GO:0045893 positive regulation of transcription DNA-dependent	546	47	0.00898959
GO:0009891 positive regulation of biosynthetic process	831	67	0.00916286
GO:0006006 glucose metabolic process	187	20	0.00934273
GO:0031328 positive regulation of cellular biosynthetic process	819	66	0.0097605
GO:0020027 hemoglobin metabolic process	8	3	0.00980257
GO:0042535 positive regulation of tumor necrosis factor biosynthetic process	8	3	0.00980257
GO:0042832 defense response to protozoan	8	3	0.00980257
GO:0046541 saliva secretion	8	3	0.00980257
GO:0052031 modulation by symbiont of host defense response	8	3	0.00980257
GO:0052255 modulation by organism of defense response of other organism involved in symbiotic interaction	8	3	0.00980257
GO:0052509 positive regulation by symbiont of host defense response	8	3	0.00980257
GO:0052510 positive regulation by organism of defense response of other organism involved in symbiotic interaction	8	3	0.00980257
GO:0006935 chemotaxis	507	44	0.00982433
GO:0042330 taxis	507	44	0.00982433
GO:0009888 tissue development	863	69	0.00989913
GO:0044057 regulation of system process	317	30	0.0099399
